# Supplementary material for: Tailoring the Fe → Pd interaction in cationic Pd(ii) complexesviastructural variation of the ligand scaffold of sterically demanding dppf-analogs and their P,N-counterparts
Source: Royal Society of Chemistry journal article supplement (doi:10.1039/d3qi00576c), 2023-01-01
Supplement: d3qi00576c1.pdf [file d3qi00576c1.pdf]

## Supporting Information (SI) File

# Tailoring the Fe→Pd interaction in cationic Pd (II) complexes via structural variation of the ligand scaffold of sterically demanding dppf-analogs and their P, N-counterparts

Subhayan Dey,<sup>a</sup> Fabian Roesler,<sup>a</sup> Clemens Bruhn,<sup>a</sup> Zsolt Kelemen,<sup>\*b</sup> Rudolf Pietschnig<sup>\*a</sup>

<sup>a</sup> Institut für Chemie und CINSaT, University of Kassel, Heinrich Plett-Straße 40, 34132 Kassel, Germany.  
E-mail: [pietschnig@uni-kassel.de](mailto:pietschnig@uni-kassel.de)

<sup>b</sup> Department of Inorganic and Analytical Chemistry, Budapest University of Technology and Economics, Múgyetem Rkp 3, 1111 Budapest, Hungary.

## Table of Contents

|                                                                                                                                                            |     |
|------------------------------------------------------------------------------------------------------------------------------------------------------------|-----|
| <b>Table S1.</b> Molecular parameters of cationic Pd(II) complexes of dppf and its diphospha- and azaphospha-analogs with Fe→Pd bonding interactions.....  | S5  |
| <b>Table S2.</b> Molecular parameters for two independent molecules of <b>10<sup>A</sup></b> and <b>10<sup>B</sup></b> in the unit cell of <b>10</b> ..... | S6  |
| <b>Fig S1.</b> Cyclic voltammetry of Fc(PPh <sub>2</sub> ), Fc(PMes <sub>2</sub> ), <b>1-3</b> , <b>7</b> , <b>8</b> , <b>10</b> and <b>13-15</b> . ....   | S7  |
| <b>Fig S2.</b> <sup>1</sup> H and <sup>13</sup> C NMR of Fc'(NH <sub>2</sub> )Br ( <b>1</b> ), measured in C <sub>6</sub> D <sub>6</sub> . ....            | S8  |
| <b>Fig S3.</b> <sup>1</sup> H NMR of Fc'(NMe <sub>2</sub> )Br ( <b>2</b> ), measured in C <sub>6</sub> D <sub>6</sub> . ....                               | S9  |
| <b>Fig S4.</b> <sup>13</sup> C NMR of Fc'(NMe <sub>2</sub> )Br ( <b>2</b> ), measured in C <sub>6</sub> D <sub>6</sub> . ....                              | S9  |
| <b>Fig S5.</b> <sup>1</sup> H NMR of Fc'(NMe <sub>2</sub> )(PPh <sub>2</sub> ) ( <b>3a</b> ), measured in TolueneD <sub>8</sub> . ....                     | S10 |
| <b>Fig S6.</b> <sup>13</sup> C NMR of Fc'(NMe <sub>2</sub> )(PPh <sub>2</sub> ) ( <b>3a</b> ), measured in Toluene D <sub>8</sub> . ....                   | S10 |
| <b>Fig S7.</b> <sup>31</sup> P { <sup>1</sup> H} NMR of Fc'(NMe <sub>2</sub> )(PPh <sub>2</sub> ) ( <b>3a</b> ), measured in Toluene D <sub>8</sub> . .... | S11 |
| <b>Fig S8.</b> <sup>1</sup> H NMR of Fc'(NMe <sub>2</sub> )(PMes <sub>2</sub> ) ( <b>3b</b> ), measured in Toluene D <sub>8</sub> . ....                   | S11 |
| <b>Fig S9.</b> <sup>13</sup> C NMR of Fc'(NMe <sub>2</sub> )(PMes <sub>2</sub> ) ( <b>3b</b> ), measured in Toluene D <sub>8</sub> . ....                  | S12 |
| <b>Fig S10.</b> <sup>31</sup> P NMR of Fc'(NMe <sub>2</sub> )(PMes <sub>2</sub> ) ( <b>3b</b> ), measured in Toluene D <sub>8</sub> . ....                 | S12 |
| <b>Fig S11.</b> <sup>1</sup> H NMR of Fc'(NMe <sub>2</sub> )(PSePh <sub>2</sub> ) ( <b>4a</b> ), measured in Toluene D <sub>8</sub> . ....                 | S13 |
| <b>Fig S12.</b> <sup>13</sup> C NMR of Fc'(NMe <sub>2</sub> )(PSePh <sub>2</sub> ) ( <b>4a</b> ), measured in Toluene D <sub>8</sub> . ....                | S13 |
| <b>Fig S13.</b> <sup>31</sup> P NMR of Fc'(NMe <sub>2</sub> )(PSePh <sub>2</sub> ) ( <b>4a</b> ), measured in Toluene D <sub>8</sub> . ....                | S14 |

|                                                                                                                                                                                                                                                                            |     |
|----------------------------------------------------------------------------------------------------------------------------------------------------------------------------------------------------------------------------------------------------------------------------|-----|
| <b>Fig S14.</b> <sup>77</sup> Se NMR of Fc'(NMe <sub>2</sub> )(PSePh <sub>2</sub> ) ( <b>4a</b> ), measured in Toluene D <sub>8</sub> .....                                                                                                                                | S14 |
| <b>Fig S15.</b> <sup>1</sup> H NMR of Fc'(NMe <sub>2</sub> )(PSeMes <sub>2</sub> ) ( <b>4b</b> ), measured in Toluene D <sub>8</sub> .....                                                                                                                                 | S15 |
| <b>Fig S16.</b> <sup>13</sup> C NMR of Fc'(NMe <sub>2</sub> )(PSeMes <sub>2</sub> ) ( <b>4b</b> ), measured in Toluene D <sub>8</sub> .....                                                                                                                                | S15 |
| <b>Fig S17.</b> <sup>31</sup> P NMR of Fc'(NMe <sub>2</sub> )(PSeMes <sub>2</sub> ) ( <b>4b</b> ), measured in Toluene D <sub>8</sub> .....                                                                                                                                | S16 |
| <b>Fig S18.</b> <sup>77</sup> Se NMR of Fc'(NMe <sub>2</sub> )(PSeMes <sub>2</sub> ) ( <b>4b</b> ), measured in Toluene D <sub>8</sub> .....                                                                                                                               | S16 |
| <b>Fig S19.</b> <sup>1</sup> H NMR of [Fc'(PMes <sub>2</sub> )(PPh <sub>2</sub> )·PdCl <sub>2</sub> ] ( <b>7</b> ), measured in CD <sub>2</sub> Cl <sub>2</sub> .....                                                                                                      | S17 |
| <b>Fig S20.</b> <sup>13</sup> C NMR of [Fc'(PMes <sub>2</sub> )(PPh <sub>2</sub> )·PdCl <sub>2</sub> ] ( <b>7</b> ), measured in CD <sub>2</sub> Cl <sub>2</sub> .....                                                                                                     | S17 |
| <b>Fig S21.</b> <sup>31</sup> P { <sup>1</sup> H} NMR of [Fc'(PMes <sub>2</sub> )(PPh <sub>2</sub> )·PdCl <sub>2</sub> ] ( <b>7</b> ), measured in CD <sub>2</sub> Cl <sub>2</sub> .....                                                                                   | S18 |
| <b>Fig S22.</b> <sup>1</sup> H NMR of [Fc'(PMes <sub>2</sub> )(P <sup>t</sup> Bu <sub>2</sub> )·PdCl <sub>2</sub> ] ( <b>8</b> ), measured in CD <sub>2</sub> Cl <sub>2</sub> .....                                                                                        | S18 |
| <b>Fig S23.</b> <sup>31</sup> P NMR{ <sup>1</sup> H} of [Fc'(PMes <sub>2</sub> )(P <sup>t</sup> Bu <sub>2</sub> )·PdCl <sub>2</sub> ] ( <b>8</b> ), measured in CD <sub>2</sub> Cl <sub>2</sub> .....                                                                      | S19 |
| <b>Fig S24.</b> <sup>1</sup> H NMR of [Fc'(NMe <sub>2</sub> )(PPh <sub>2</sub> )·0.5PdCl <sub>2</sub> ] ( <b>9</b> ), measured in Toluene D <sub>8</sub> .....                                                                                                             | S19 |
| <b>Fig S25.</b> <sup>13</sup> C NMR of [Fc'(NMe <sub>2</sub> )(PPh <sub>2</sub> )·0.5PdCl <sub>2</sub> ] ( <b>9</b> ), measured in Toluene D <sub>8</sub> .....                                                                                                            | S20 |
| <b>Fig S26.</b> <sup>31</sup> P{ <sup>1</sup> H} NMR of [Fc'(NMe <sub>2</sub> )(PPh <sub>2</sub> )·0.5PdCl <sub>2</sub> ] ( <b>9</b> ), measured in Toluene D <sub>8</sub> .....                                                                                           | S20 |
| <b>Fig S27.</b> <sup>1</sup> H NMR of [Fc'(PMes <sub>2</sub> )(P <sup>t</sup> Bu <sub>2</sub> )·PdCl][SbF <sub>6</sub> ] ( <b>10</b> ), measured in CD <sub>2</sub> Cl <sub>2</sub> .....                                                                                  | S21 |
| <b>Fig S28.</b> <sup>13</sup> C NMR of [Fc'(PMes <sub>2</sub> )(P <sup>t</sup> Bu <sub>2</sub> )·PdCl][SbF <sub>6</sub> ] ( <b>10</b> ), measured in CD <sub>2</sub> Cl <sub>2</sub> .....                                                                                 | S21 |
| <b>Fig S29.</b> <sup>31</sup> P{ <sup>1</sup> H} NMR of Fc'(PMes <sub>2</sub> )(P <sup>t</sup> Bu <sub>2</sub> )[PdCl][SbF <sub>6</sub> ] ( <b>10</b> ), measured in CD <sub>2</sub> Cl <sub>2</sub> .....                                                                 | S22 |
| <b>Fig S30.</b> <sup>19</sup> F NMR of [Fc'(PMes <sub>2</sub> )(P <sup>t</sup> Bu <sub>2</sub> )·PdCl][SbF <sub>6</sub> ] ( <b>10</b> ), measured in CD <sub>2</sub> Cl <sub>2</sub> .....                                                                                 | S22 |
| <b>Fig S32.</b> <sup>13</sup> C NMR of [Fc'(NMe <sub>2</sub> )(PPh <sub>2</sub> )·PdCl][SbF <sub>6</sub> ] <sub>2</sub> ( <b>11</b> ), measured in CD <sub>2</sub> Cl <sub>2</sub> .....                                                                                   | S23 |
| <b>Fig S33.</b> <sup>31</sup> P{ <sup>1</sup> H} NMR of [Fc'(NMe <sub>2</sub> )(PPh <sub>2</sub> )·PdCl][SbF <sub>6</sub> ] <sub>2</sub> ( <b>11</b> ), measured in CD <sub>2</sub> Cl <sub>2</sub> .....                                                                  | S24 |
| <b>Fig S34.</b> <sup>19</sup> F NMR of [Fc'(NMe <sub>2</sub> )(PPh <sub>2</sub> )·PdCl][SbF <sub>6</sub> ] <sub>2</sub> ( <b>11</b> ), measured in CD <sub>2</sub> Cl <sub>2</sub> .....                                                                                   | S24 |
| <b>Fig S35.</b> <sup>1</sup> H NMR of [Fc'(NMe <sub>2</sub> )(PPh <sub>2</sub> )·PdPPh <sub>2</sub> (C <sub>5</sub> H <sub>5</sub> )] [SbF <sub>6</sub> ] <sub>2</sub> ( <b>12</b> ), measured in CD <sub>2</sub> Cl <sub>2</sub> .....                                    | S25 |
| <b>Fig S36.</b> <sup>13</sup> C NMR of [Fc'(NMe <sub>2</sub> )(PPh <sub>2</sub> )·PdPPh <sub>2</sub> (C <sub>5</sub> H <sub>5</sub> )] [SbF <sub>6</sub> ] <sub>2</sub> ( <b>12</b> ), measured in CD <sub>2</sub> Cl <sub>2</sub> .....                                   | S25 |
| <b>Fig S37.</b> <sup>31</sup> P{ <sup>1</sup> H} NMR of [Fc'(NMe <sub>2</sub> )(PPh <sub>2</sub> )·PdPPh <sub>2</sub> (C <sub>5</sub> H <sub>5</sub> )] [SbF <sub>6</sub> ] <sub>2</sub> ( <b>12</b> ), measured in CD <sub>2</sub> Cl <sub>2</sub> .....                  | S26 |
| <b>Fig S38.</b> <sup>1</sup> H NMR of [Fc'(NMe <sub>2</sub> )(PPh <sub>2</sub> )·PdPPh <sub>3</sub> ][BF <sub>4</sub> ] <sub>2</sub> ( <b>13</b> ), measured in CD <sub>2</sub> Cl <sub>2</sub> .....                                                                      | S26 |
| <b>Fig S39.</b> <sup>13</sup> C NMR of [Fc'(NMe <sub>2</sub> )(PPh <sub>2</sub> )·PdPPh <sub>3</sub> ][BF <sub>4</sub> ] <sub>2</sub> ( <b>13</b> ), measured in CD <sub>2</sub> Cl <sub>2</sub> .....                                                                     | S27 |
| <b>Fig S40.</b> <sup>31</sup> P{ <sup>1</sup> H} NMR of [Fc'(NMe <sub>2</sub> )(PPh <sub>2</sub> )·PdPPh <sub>3</sub> ][BF <sub>4</sub> ] <sub>2</sub> ( <b>13</b> ), measured in CD <sub>2</sub> Cl <sub>2</sub> .....                                                    | S27 |
| <b>Fig S41.</b> <sup>11</sup> B NMR of [Fc'(NMe <sub>2</sub> )(PPh <sub>2</sub> )·PdPPh <sub>3</sub> ][BF <sub>4</sub> ] <sub>2</sub> ( <b>13</b> ), measured in CD <sub>2</sub> Cl <sub>2</sub> .....                                                                     | S28 |
| <b>Fig S42.</b> <sup>19</sup> F NMR of [Fc'(NMe <sub>2</sub> )(PPh <sub>2</sub> )·PdPPh <sub>3</sub> ][BF <sub>4</sub> ] <sub>2</sub> ( <b>13</b> ), measured in CD <sub>2</sub> Cl <sub>2</sub> .....                                                                     | S28 |
| <b>Fig S43.</b> <sup>1</sup> H and <sup>31</sup> P NMR for failed synthesis of [Fc'(NMe <sub>2</sub> )(PPh <sub>2</sub> )·PdMes <sub>3</sub> ][BF <sub>4</sub> ] <sub>2</sub> , measured in CD <sub>2</sub> Cl <sub>2</sub> .....                                          | S29 |
| <b>Fig S44.</b> <sup>1</sup> H and <sup>31</sup> P{ <sup>1</sup> H} NMR for failed synthesis of [Fc'(NMe <sub>2</sub> )(PPh <sub>2</sub> )·Pd( <i>o</i> -Tol) <sub>3</sub> ][BF <sub>4</sub> ] <sub>2</sub> , measured in CD <sub>2</sub> Cl <sub>2</sub> .....            | S30 |
| <b>Fig S45.</b> <sup>1</sup> H and <sup>31</sup> P NMR for selective synthesis of [Fc'(NMe <sub>2</sub> )(PPh <sub>2</sub> )·Pd(PPh <sub>2</sub> )Fc'(NMe <sub>2</sub> )] [BF <sub>4</sub> ] <sub>2</sub> ( <b>14</b> ), measured in CD <sub>2</sub> Cl <sub>2</sub> ..... | S31 |
| <b>Fig S46.</b> <sup>11</sup> B NMR of [Fc'(NMe <sub>2</sub> )(PPh <sub>2</sub> )·Pd(PPh <sub>2</sub> )Fc'(NMe <sub>2</sub> )] [BF <sub>4</sub> ] <sub>2</sub> ( <b>14</b> ), measured in CD <sub>2</sub> Cl <sub>2</sub> .....                                            | S32 |
| <b>Fig S47.</b> <sup>19</sup> F NMR of [Fc'(NMe <sub>2</sub> )(PPh <sub>2</sub> )·Pd(PPh <sub>2</sub> )Fc'(NMe <sub>2</sub> )] [BF <sub>4</sub> ] <sub>2</sub> ( <b>14</b> ), measured in CD <sub>2</sub> Cl <sub>2</sub> .....                                            | S32 |
| <b>Fig S48.</b> <sup>31</sup> P{ <sup>1</sup> H} NMR of the reaction mixture of <b>13</b> and P( <i>p</i> -OMe-C <sub>6</sub> H <sub>4</sub> ) <sub>3</sub> , measured after 5 mins at RT in non-deuterated Acetone.....                                                   | S33 |
| <b>Fig S49.</b> <sup>31</sup> P{ <sup>1</sup> H} NMR of the reaction mixture of <b>13</b> and P( <i>p</i> -OMe-C <sub>6</sub> H <sub>4</sub> ) <sub>3</sub> , measured after 1 hr at 50 °C in non-deuterated Acetone.....                                                  | S33 |

|                                                                                                                                                                                                                              |     |
|------------------------------------------------------------------------------------------------------------------------------------------------------------------------------------------------------------------------------|-----|
| <b>Fig S50.</b> $^{31}\text{P}\{^1\text{H}\}$ NMR of the reaction mixture of <b>13</b> and $\text{P}(p\text{-OMe-C}_6\text{H}_4)_3$ , measured after 15 hrs at 50 °C in non-deuterated Acetone. ....                         | S34 |
| <b>Fig S51.</b> $^{31}\text{P}\{^1\text{H}\}$ NMR of the reaction mixture of <b>13</b> and $\text{P}(p\text{-OMe-C}_6\text{H}_4)_3$ , measured after 39 hrs at 50 °C in non-deuterated Acetone. ....                         | S34 |
| <b>Fig S52.</b> $^{31}\text{P}\{^1\text{H}\}$ NMR of the reaction mixture of <b>13</b> and $\text{P}(p\text{-OMe-C}_6\text{H}_4)_3$ , measured after 50 hrs at 50 °C in non-deuterated Acetone. ....                         | S35 |
| <b>Fig S53.</b> $^1\text{H}$ NMR of $[\text{Fc}'(\text{NMe}_2)(\text{PPh}_2)]\text{Pd}[\text{P}(p\text{-OMe-C}_6\text{H}_4)_3][\text{BF}_4]_2$ ( <b>15</b> ), measured in $\text{CD}_2\text{Cl}_2$ . ....                    | S35 |
| <b>Fig S54.</b> $^{13}\text{C}$ NMR of $[\text{Fc}'(\text{NMe}_2)(\text{PPh}_2)]\text{Pd}[\text{P}(p\text{-OMe-C}_6\text{H}_4)_3][\text{BF}_4]_2$ ( <b>15</b> ), measured in $\text{CD}_2\text{Cl}_2$ . ....                 | S36 |
| <b>Fig S55.</b> $^{31}\text{P}\{^1\text{H}\}$ NMR of $[\text{Fc}'(\text{NMe}_2)(\text{PPh}_2)]\text{Pd}[\text{P}(p\text{-OMe-C}_6\text{H}_4)_3][\text{BF}_4]_2$ ( <b>15</b> ), measured in $\text{CD}_2\text{Cl}_2$ . ....   | S36 |
| <b>Fig S56.</b> $^{11}\text{B}$ NMR of $[\text{Fc}'(\text{NMe}_2)(\text{PPh}_2)]\text{Pd}[\text{P}(p\text{-OMe-C}_6\text{H}_4)_3][\text{BF}_4]_2$ ( <b>15</b> ), measured in $\text{CD}_2\text{Cl}_2$ . ....                 | S37 |
| <b>Fig S57.</b> $^{19}\text{F}$ NMR of $[\text{Fc}'(\text{NMe}_2)(\text{PPh}_2)]\text{Pd}[\text{P}(p\text{-OMe-C}_6\text{H}_4)_3][\text{BF}_4]_2$ ( <b>15</b> ), measured in $\text{CD}_2\text{Cl}_2$ . ....                 | S37 |
| <b>Fig S58.</b> $^1\text{H}$ and $^{31}\text{P}\{^1\text{H}\}$ NMR for unsuccessful synthesis of $[\text{Fc}'(\text{NMe}_2)(\text{PMe}_2)\cdot\text{Pd}][\text{BF}_4]_2$ , measured in $\text{CD}_2\text{Cl}_2$ . ....       | S38 |
| <b>Fig S59.</b> $^1\text{H}$ and $^{31}\text{P}\{^1\text{H}\}$ NMR for unsuccessful synthesis of $[\text{Fc}'(\text{NMe}_2)(\text{PMe}_2)\cdot\text{PdCl}_2]$ , measured in Toluene D8. ....                                 | S39 |
| <b>Fig S60.</b> $^1\text{H}$ and $^{31}\text{P}\{^1\text{H}\}$ NMR for unsuccessful synthesis of $[\text{Fc}'(\text{NMe}_2)(\text{PMe}_2)\cdot\text{PdCl}_2]$ , measured in Toluene D8 after heating at 50°C for 2 hrs. .... | S40 |
| <b>Fig S61.</b> $^{13}\text{C}$ NMR of $[\text{Fc}'(\text{PMe}_2)(\text{P}^t\text{Bu}_2)\cdot\text{PdCl}_2]$ ( <b>8</b> ), measured in $\text{CD}_2\text{Cl}_2$ . ....                                                       | S41 |
| <b>Fig S62.</b> Isomer of $[\text{dtbpf}\cdot\text{PdCl}]^+$ with Fe-Pd interaction and dimer with T-shaped geometry around Pd center. ....                                                                                  | S41 |
| <b>Table S3.</b> Crystal Refinement data of Compounds <b>1</b> , <b>3</b> and <b>4a</b> . ....                                                                                                                               | S42 |
| <b>Table S4.</b> Crystal Refinement data of Compounds <b>7-9</b> . ....                                                                                                                                                      | S43 |
| <b>Table S5.</b> Crystal Refinement data of Compounds <b>10-15</b> . ....                                                                                                                                                    | S44 |
| <b>Table S6:</b> Bond lengths and angles for compound <b>1</b> ....                                                                                                                                                          | S45 |
| <b>Table S7:</b> Bond lengths and angles for compound <b>3a</b> ....                                                                                                                                                         | S46 |
| <b>Table S8:</b> Bond lengths and angles for compound <b>3b</b> ....                                                                                                                                                         | S49 |
| <b>Table S9:</b> Bond lengths and angles for compound <b>4a</b> ....                                                                                                                                                         | S51 |
| <b>Table S10:</b> Bond lengths and angles for compound <b>7</b> ....                                                                                                                                                         | S52 |
| <b>Table S11:</b> Bond lengths and angles for compound <b>8</b> ....                                                                                                                                                         | S55 |
| <b>Table S12:</b> Bond lengths and angles for compound <b>9</b> ....                                                                                                                                                         | S57 |
| <b>Table S13:</b> Bond lengths and angles for compound <b>10</b> ....                                                                                                                                                        | S59 |
| <b>Table S14:</b> Bond lengths and angles for compound <b>11</b> ....                                                                                                                                                        | S63 |
| <b>Table S15:</b> Bond lengths and angles for compound <b>12</b> ....                                                                                                                                                        | S65 |
| <b>Table S16:</b> Bond lengths and angles for compound <b>13</b> ....                                                                                                                                                        | S67 |
| <b>Table S17:</b> Bond lengths and angles for compound <b>14</b> ....                                                                                                                                                        | S70 |
| <b>Table S18:</b> Bond lengths and angles for compound <b>15</b> ....                                                                                                                                                        | S73 |
| <b>Computational details</b> ....                                                                                                                                                                                            | S76 |
| <b>Table S19:</b> Experimental and DFT calculated Fe-Pd distances (in Å). For C, N, O, H, Cl, P 6-311+G** and for Pd Def2TZVP basis sets were applied ....                                                                   | S76 |
| <b>Table S20:</b> Electron density in the bond critical point and Wiberg index for Fe-Pd bond at $\omega\text{B97X-D}/6\text{-311+G}^{**}$ (for Pd Def2TZVP) ....                                                            | S77 |
| <b>Fig S63</b> Selected Kohn-Sham orbitals of the investigated systems. These orbitals can be responsible for the Fe->Pd interaction.....                                                                                    | S77 |

|                                                                                                                                           |     |
|-------------------------------------------------------------------------------------------------------------------------------------------|-----|
| <b>Table S21.</b> Tabulated data of the PES scans of compounds <b>10-15</b> .....                                                         | S78 |
| <b>Table S22.</b> Results of the PES scan of <b>16</b> and the electron density in the bond critical points and Wiberg bond indices ..... | S79 |
| <b>Table S23.</b> Results of the PES scan of <b>17</b> and the electron density in the bond critical points and Wiberg bond indices ..... | S79 |
| <b>Table S24.</b> Results of the PES scan of <b>18</b> and the electron density in the bond critical points and Wiberg bond indices ..... | S79 |
| <b>References</b> .....                                                                                                                   | S80 |

**Table S1.** Molecular parameters of cationic Pd(II) complexes of dppf and its diphospha- and azaphospha-analogs with Fe→Pd bonding interactions.

| Entry | DPPF Analogs                                                                          | Square-planar Pd(II) complexes                                                                                                                                    | Avg. C <sup><i>ipso</i></sup> ,Cp-E Bond Length (Å) <sup>#</sup>                                                                                                                                  | Avg. Pd-P/N Bond Length (Å) <sup>#</sup>                                                                                                                                                                  | Pd-PR <sub>3</sub> /anion Bond Length (Å) <sup>#</sup>                                                  | Pd-Fe distance (Å)                                                            | Tilt Angle α (°) <sup>*</sup> | Bite Angle β <sub>n</sub> (°)                                                                         | Torsion Angle τ (°) <sup>*</sup>                                  |
|-------|---------------------------------------------------------------------------------------|-------------------------------------------------------------------------------------------------------------------------------------------------------------------|---------------------------------------------------------------------------------------------------------------------------------------------------------------------------------------------------|-----------------------------------------------------------------------------------------------------------------------------------------------------------------------------------------------------------|---------------------------------------------------------------------------------------------------------|-------------------------------------------------------------------------------|-------------------------------|-------------------------------------------------------------------------------------------------------|-------------------------------------------------------------------|
| 1     | dppf                                                                                  | [dppf·Pd(PPh <sub>3</sub> )] [BF <sub>4</sub> ] <sub>2</sub> <sup>1,2</sup>                                                                                       | 1.787 <sup>a</sup> (E = P) <sup>1,2</sup>                                                                                                                                                         | 2.2958 (E = P)                                                                                                                                                                                            | 2.2783 (PR <sub>3</sub> = PPh <sub>3</sub> ) <sup>1,2</sup>                                             | 2.8934 <sup>a</sup>                                                           | 19.7 <sup>a</sup>             | 156.79 <sup>a</sup>                                                                                   | 41.1                                                              |
|       |                                                                                       | [dppf·PdP(C <sub>5</sub> H <sub>4</sub> - <i>p</i> -F) <sub>3</sub> ] [BF <sub>4</sub> ] <sub>2</sub> <sup>3</sup>                                                | 1.784 (E = P) <sup>3</sup>                                                                                                                                                                        | 2.293 (E = P)                                                                                                                                                                                             | 2.2835(7) (PR <sub>3</sub> = P(C <sub>5</sub> H <sub>4</sub> - <i>p</i> -F) <sub>3</sub> ) <sup>3</sup> | 3.0014(4) <sup>3</sup>                                                        | 22.1                          | 157.54(3) <sup>3</sup>                                                                                | 26.9                                                              |
| 2     | Fc'(P <sup>t</sup> Bu <sub>2</sub> )(PPh <sub>2</sub> )                               | [Fc'(P <sup>t</sup> Bu <sub>2</sub> )(PPh <sub>2</sub> )·Pd(PPh <sub>3</sub> )] [BF <sub>4</sub> ] <sub>2</sub> <sup>1</sup>                                      | 1.785(3) (E = P <sup>t</sup> Bu), 1.777(3) (E = P <sup>Ph</sup> ) <sup>1</sup>                                                                                                                    | 2.342(1) (E = P <sup>t</sup> Bu), 2.307(1) (E = P <sup>Ph</sup> ) <sup>1</sup>                                                                                                                            | 2.2953(9) (PR <sub>3</sub> = PPh <sub>3</sub> ) <sup>1</sup>                                            | 2.9310(5) <sup>1</sup>                                                        | 19.7                          | 156.11(3) <sup>1</sup>                                                                                | 42.6                                                              |
| 3     | Fc'(P <sup>t</sup> Bu <sub>2</sub> ) <sub>2</sub>                                     | [Fc'(P <sup>t</sup> Bu <sub>2</sub> ) <sub>2</sub> ·PdCl] [SbCl <sub>6</sub> ] <sup>1</sup>                                                                       | 1.797 (E = P) <sup>1</sup>                                                                                                                                                                        | 2.275 (E = P) <sup>1</sup>                                                                                                                                                                                | 2.316(2) (anion = Cl <sup>-</sup> ) <sup>1</sup>                                                        | 2.9389(4) <sup>1</sup>                                                        | 19.8                          | 162.34(2) <sup>1</sup>                                                                                | 30.5                                                              |
|       |                                                                                       | [Fc'(P <sup>t</sup> Bu <sub>2</sub> ) <sub>2</sub> ·Pd] [I] <sup>1,4</sup>                                                                                        | 1.823 <sup>a</sup> (E = P) <sup>1,4</sup>                                                                                                                                                         | 2.3296 <sup>a</sup> (E = P)                                                                                                                                                                               | 2.6402 <sup>a</sup> (anion = I <sup>-</sup> )                                                           | 2.9390 <sup>a</sup>                                                           | 18.0 <sup>a</sup>             | 161.88 <sup>a</sup>                                                                                   | 34.6                                                              |
|       |                                                                                       | [Fc'(P <sup>t</sup> Bu <sub>2</sub> ) <sub>2</sub> ·PdBr] [TFAB] <sup>‡4</sup>                                                                                    | 1.829 (E = P) <sup>4</sup>                                                                                                                                                                        | 2.296 (E = P)                                                                                                                                                                                             | 2.449(1) (anion = Br <sup>-</sup> )                                                                     | 2.9395(18)                                                                    | 19.2                          | 163.04(5)                                                                                             | 31.0                                                              |
|       |                                                                                       | [Fc'(P <sup>t</sup> Bu <sub>2</sub> ) <sub>2</sub> ·Pd(C <sub>6</sub> H <sub>4</sub> - <i>p</i> -CN)] [BF <sub>4</sub> ] <sub>2</sub> <sup>5</sup>                | 1.808 (E = P) <sup>5</sup>                                                                                                                                                                        | 2.307 (E = P)                                                                                                                                                                                             | 2.001 (anion = (C <sub>6</sub> H <sub>4</sub> - <i>p</i> -CN) <sup>-</sup> )                            | 2.9988(8)                                                                     | 16.3                          | 159.75(4)                                                                                             | 35.9                                                              |
| 4     | Fc'[P(C <sub>6</sub> H <sub>11</sub> ) <sub>2</sub> ] <sub>2</sub>                    | [Fc'[P(C <sub>6</sub> H <sub>11</sub> ) <sub>2</sub> ] <sub>2</sub> ·Pd(PPh <sub>3</sub> )] [BF <sub>4</sub> ] <sub>2</sub> <sup>1</sup>                          | 1.782 (E = P) <sup>1</sup>                                                                                                                                                                        | 2.3134 (E = P)                                                                                                                                                                                            | 2.2860(7) (PR <sub>3</sub> = PPh <sub>3</sub> ) <sup>1</sup>                                            | 2.9339(5) <sup>1</sup>                                                        | 18.9                          | 156.63(3) <sup>1</sup>                                                                                | 38.2                                                              |
|       |                                                                                       | [Fc'[P(C <sub>6</sub> H <sub>11</sub> ) <sub>2</sub> ] <sub>2</sub> ·Pd(PMe <sub>3</sub> )] [BF <sub>4</sub> ] <sub>2</sub> <sup>1</sup>                          | 1.783 (E = P) <sup>1</sup>                                                                                                                                                                        | 2.302 (E = P)                                                                                                                                                                                             | 2.271(2) (PR <sub>3</sub> = PMe <sub>3</sub> ) <sup>1</sup>                                             | 2.9567(10) <sup>1</sup>                                                       | 20.4                          | 157.20(6) <sup>1</sup>                                                                                | 41.7                                                              |
| 5     | Fc'(CpP <sup>i</sup> Pr <sub>2</sub> ) <sub>2</sub>                                   | [Fc'(CpP <sup>i</sup> Pr <sub>2</sub> ) <sub>2</sub> ·Pd(PMe <sub>3</sub> )] [BF <sub>4</sub> ] <sub>2</sub> <sup>1</sup>                                         | 1.786 (E = P) <sup>1</sup>                                                                                                                                                                        | 2.2924 (E = P)                                                                                                                                                                                            | 2.2590(5) (PR <sub>3</sub> = PMe <sub>3</sub> ) <sup>1</sup>                                            | 3.0168(4) <sup>1</sup>                                                        | 19.1                          | 158.09(2) <sup>1</sup>                                                                                | 32.6                                                              |
| 6     | Fc'(PMe <sub>3</sub> ) <sub>2</sub> (P <sup>t</sup> Bu <sub>2</sub> )<br>( <b>8</b> ) | [Fc'(PMe <sub>3</sub> ) <sub>2</sub> (P <sup>t</sup> Bu <sub>2</sub> )·PdCl] [SbF <sub>6</sub> ] ( <b>10<sup>A</sup></b> and <b>10<sup>B</sup></b> ) <sup>a</sup> | 1.792(5) (E = P <sup>t</sup> Bu) and 1.785(5) (E = P <sup>Mes</sup> ) for <b>10<sup>A</sup></b> ; 1.797(5) (E = P <sup>t</sup> Bu) and 1.790(5) (E = P <sup>Mes</sup> ) for <b>10<sup>B</sup></b> | 2.2751(16) (E = P <sup>t</sup> Bu) and 2.3404(14) (E = P <sup>Mes</sup> ) for <b>10<sup>A</sup></b> ; 2.2931(15) (E = P <sup>t</sup> Bu) and 2.3289(15) (E = P <sup>Mes</sup> ) for <b>10<sup>B</sup></b> | 2.3278(13) ( <b>10<sup>A</sup></b> ) and 2.3278(13) ( <b>10<sup>B</sup></b> )                           | 2.8369(10) ( <b>10<sup>A</sup></b> ) and 2.7974(10) ( <b>10<sup>B</sup></b> ) | 21.5 <sup>a</sup>             | 161.60(5) <sup>o</sup> ( <b>10<sup>A</sup></b> ) and 161.46(5) <sup>o</sup> ( <b>10<sup>B</sup></b> ) | 40.5 ( <b>10<sup>A</sup></b> ) and 46.2 ( <b>10<sup>B</sup></b> ) |
| 7     | Fc'[NC(NHR) <sub>2</sub> ]<br>(PPh <sub>2</sub> )                                     | [Fc'[NC(NH <sup>i</sup> Pr) <sub>2</sub> ](PPh <sub>2</sub> )·PdCl] [SbF <sub>6</sub> ] <sup>6</sup>                                                              | 1.775(2) (E = P) and 1.379(3) (E = N) <sup>6</sup>                                                                                                                                                | 2.1947(6) (E = P) and 2.084(2) (E = N) <sup>6</sup>                                                                                                                                                       | 2.3755(7) <sup>6</sup>                                                                                  | 2.7590(5) <sup>6</sup>                                                        | 24.6                          | 163.01(5) <sup>6</sup>                                                                                | 1.9                                                               |
|       |                                                                                       | [Fc'[NC(NHCy) <sub>2</sub> ](PPh <sub>2</sub> )·PdCl] [SbF <sub>6</sub> ] <sup>c6</sup>                                                                           | 1.773(2) (E = P) and 1.388(2) (E = N) <sup>6</sup>                                                                                                                                                | 2.1822(7) (E = P) and 2.051(2) (E = N) <sup>6</sup>                                                                                                                                                       | 2.3352(5) <sup>6</sup>                                                                                  | 2.7956(5) <sup>6</sup>                                                        | 22.8                          | 162.46(5) <sup>6</sup>                                                                                | 5.7                                                               |
|       |                                                                                       | [Fc'[NC(NHXyl) <sub>2</sub> ](PPh <sub>2</sub> )·PdCl] [SbF <sub>6</sub> ] <sup>d6</sup>                                                                          | 1.770(2) (E = P) and 1.384(2) (E = N) <sup>6</sup>                                                                                                                                                | 2.1850(6) (E = P) and 2.065(2) (E = N) <sup>6</sup>                                                                                                                                                       | 2.3514(5) <sup>6</sup>                                                                                  | 2.7821(4) <sup>6</sup>                                                        | 23.0                          | 163.15(5) <sup>6</sup>                                                                                | 5.9                                                               |
| 8     | Fc'[NH(CH <sub>2</sub> ) <sub>2</sub> PPh <sub>2</sub> ]<br>(PPh <sub>2</sub> )       | [Fc'[NH(CH <sub>2</sub> ) <sub>2</sub> PPh <sub>2</sub> ](PPh <sub>2</sub> )·Pd] [SbF <sub>6</sub> ] <sub>2</sub> <sup>7</sup>                                    | 1.790(7) (E = P) and 1.419(9) (E = N) <sup>7</sup>                                                                                                                                                | 2.212(2) (E = P) and 2.083(4) (E = N) <sup>7</sup>                                                                                                                                                        | 2.261(2) (PR <sub>3</sub> = PPh <sub>2</sub> C <sub>2</sub> H <sub>4</sub> Fc) <sup>7</sup>             | 2.7889(9) <sup>7</sup>                                                        | 21.3                          | 164.4(2) <sup>7</sup>                                                                                 | 9.8                                                               |
|       |                                                                                       | [Fc'(PPh <sub>2</sub> )(NMe <sub>2</sub> )·PdCl] [SbF <sub>6</sub> ] <sub>2</sub> ( <b>11</b> )                                                                   | 1.783(11) (E = P) and 1.389(15) (E = N)                                                                                                                                                           | 2.190(3) (E = P) and 2.118(8) (E = N)                                                                                                                                                                     | 2.315(3) (anion = Cl <sup>-</sup> )                                                                     | 2.738(2)                                                                      | 22.9                          | 163.6(3)                                                                                              | 1.7                                                               |
|       |                                                                                       | [Fc'(PPh <sub>2</sub> )(NMe <sub>2</sub> )·Pd(PPh <sub>2</sub> C <sub>5</sub> H <sub>5</sub> )] [SbF <sub>6</sub> ] <sub>2</sub> ( <b>12</b> )                    | 1.788(8) (E = P) and 1.420(9) (E = N)                                                                                                                                                             | 2.236(3) (E = P) and 2.140(6) (E = N)                                                                                                                                                                     | 2.310(3) (PR <sub>3</sub> = PPh <sub>2</sub> C <sub>5</sub> H <sub>5</sub> )                            | 2.811(3)                                                                      | 21.9                          | 159.11(19)                                                                                            | 22.3                                                              |
| 9     | Fc'(NMe <sub>2</sub> )(PPh <sub>2</sub> )<br>( <b>3a</b> )                            | [Fc'(PPh <sub>2</sub> )(NMe <sub>2</sub> )·Pd(PPh <sub>3</sub> )] [BF <sub>4</sub> ] <sub>2</sub> ( <b>13</b> )                                                   | 1.773(12) (E = P) and 1.427(15) (E = N)                                                                                                                                                           | 2.253(3) (E = P) and 2.157(9) (E = N)                                                                                                                                                                     | 2.298(3) (PR <sub>3</sub> = PPh <sub>3</sub> )                                                          | 2.8289(19)                                                                    | 20.9                          | 158.9(3)                                                                                              | 20.4                                                              |
|       |                                                                                       | [Fc'(PPh <sub>2</sub> )(NMe <sub>2</sub> )·Pd(PPh <sub>2</sub> )Fc'(NMe <sub>2</sub> )] [BF <sub>4</sub> ] <sub>2</sub> ( <b>14</b> )                             | 1.766(6) (E = P) and 1.427(7) (E = N)                                                                                                                                                             | 2.2297(15) (E = P) and 2.138(5) (E = N)                                                                                                                                                                   | 2.3022(14) (PR <sub>3</sub> = (PPh <sub>2</sub> )Fc'(NMe <sub>2</sub> ))                                | 2.8184(9)                                                                     | 19.5                          | 158.79(13)                                                                                            | 30.7                                                              |
|       |                                                                                       | [Fc'(PPh <sub>2</sub> )(NMe <sub>2</sub> )·PdP( <i>p</i> -OMe-C <sub>6</sub> H <sub>4</sub> ) <sub>3</sub> ] [BF <sub>4</sub> ] <sub>2</sub> ( <b>15</b> )        | 1.770(7) (E = P) and 1.408(9) (E = N)                                                                                                                                                             | 2.2468(14) (E = P) and 2.146(5) (E = N)                                                                                                                                                                   | 2.2996(17) (PR <sub>3</sub> = P( <i>p</i> -OMe-C <sub>6</sub> H <sub>4</sub> ) <sub>3</sub> )           | 2.8349(11)                                                                    | 22.5                          | 160.45(16)                                                                                            | 11.1                                                              |

<sup>#</sup> Averages of two identical bonds from a single molecule (standard deviations are excluded)<sup>\*</sup> Angles were calculated using Mercury as crystallographic software<sup>8,9</sup><sup>‡</sup> TFAB = tetrakis(pentafluorophenyl)borate, [B(C<sub>6</sub>F<sub>5</sub>)<sub>4</sub>]<sup>-</sup><sup>a</sup> Averages from all crystallographically independent entities in the unit cell (standard deviations are excluded)<sup>b</sup> Im = 1,3-di(propan-2-yl)-1,3-dihydro-2H-imidazol-2-ylidene<sup>c</sup> Cy = C<sub>6</sub>H<sub>11</sub>; <sup>d</sup> Xyl = 2,4,6-Me<sub>3</sub>-C<sub>6</sub>H<sub>2</sub>

**Table S2.** Molecular parameters for two independent molecules of **10<sup>A</sup>** and **10<sup>B</sup>** in the unit cell of **10**

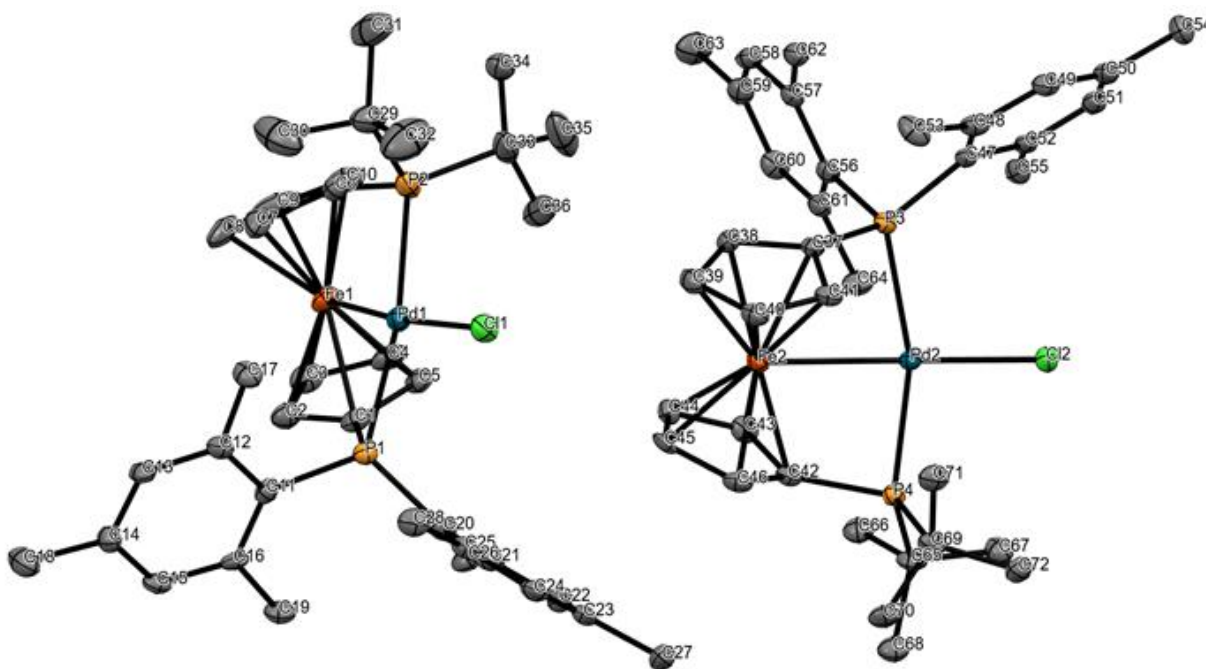

## Molecule 1

## Molecule 2

| Parameters                                                                | Molecule 1 ( <b>10<sup>A</sup></b> ) | Molecule 2 ( <b>10<sup>B</sup></b> ) |
|---------------------------------------------------------------------------|--------------------------------------|--------------------------------------|
| Fe-Pd distance                                                            | 2.8369(10) Å                         | 2.7974(10) Å                         |
| Pd-Cl                                                                     | 2.3278(13) Å                         | 2.3278(13) Å                         |
| pMes_C <sub>ipso</sub> ,Cp,Fc                                             | 1.785(5) Å                           | 1.790(5) Å                           |
| p <sup>t</sup> Bu_C <sub>ipso</sub> ,Cp,Fc                                | 1.792(5) Å                           | 1.797(5) Å                           |
| P-C <sub>ipso</sub> ,Mes                                                  | 1.828(5) Å, 1.829(5) Å               | 1.828(5) Å, 1.832(5) Å               |
| P-C <sub>ipso</sub> , <sup>t</sup> Bu                                     | 1.888(6) Å, 1.868(6) Å               | 1.887(5) Å, 1.873(5) Å               |
| Pd-P <sup>Mes</sup>                                                       | 2.3404(14) Å                         | 2.3289(15) Å                         |
| Pd-P <sup>t</sup> Bu                                                      | 2.2751(16) Å                         | 2.2931(15) Å                         |
| Tilt Angle                                                                | 21.32°                               | 21.63°                               |
| Torsion Angle                                                             | 40.46°                               | 46.17°                               |
| C <sub>ipso</sub> ,Mes-p-C <sub>ipso</sub> ,Mes                           | 113.2(2)°                            | 108.7(2)°                            |
| C <sub>ipso</sub> , <sup>t</sup> Bu-p-C <sub>ipso</sub> , <sup>t</sup> Bu | 111.8(3)°                            | 111.7(2)°                            |
| Bite angle                                                                | 161.60(5)°                           | 161.46(5)                            |
| Pd-P-C <sub>ipso</sub> , <sup>t</sup> Bu                                  | 117.84(19)° and 115.7(2)°            | 117.66(16)° and 117.96(16)°          |
| Pd-P-C <sub>ipso</sub> ,Mes                                               | 120.16(16)° and 118.34(17)°          | 117.18(16)° and 123.59(16)°          |
| C <sub>ipso</sub> , <sup>t</sup> Bu-p-C <sub>ipso</sub> , <sup>t</sup> Bu | 111.8(3)°                            | 111.7(2)°                            |
| C <sub>ipso</sub> ,Fc-p-C <sub>ipso</sub> , <sup>t</sup> Bu               | 108.6(3)° and 110.3(3)°              | 109.6(2)° and 109.7(2)°              |
| Cumulative Angle around P <sup>t</sup> Bu                                 | 330.7(3)°                            | 331.0(2)°                            |
| C <sub>ipso</sub> ,Mes-p-C <sub>ipso</sub> ,Mes                           | 113.2(2)°                            | 108.7(2)°                            |
| C <sub>ipso</sub> ,Fc-p-C <sub>ipso</sub> ,Mes                            | 105.0(2) and 111.3(2)°               | 115.3(2)° and 104.2(2)°              |
| Cumulative Angle around P <sup>Mes</sup>                                  | 329.5(2)°                            | 328.2(2)°                            |

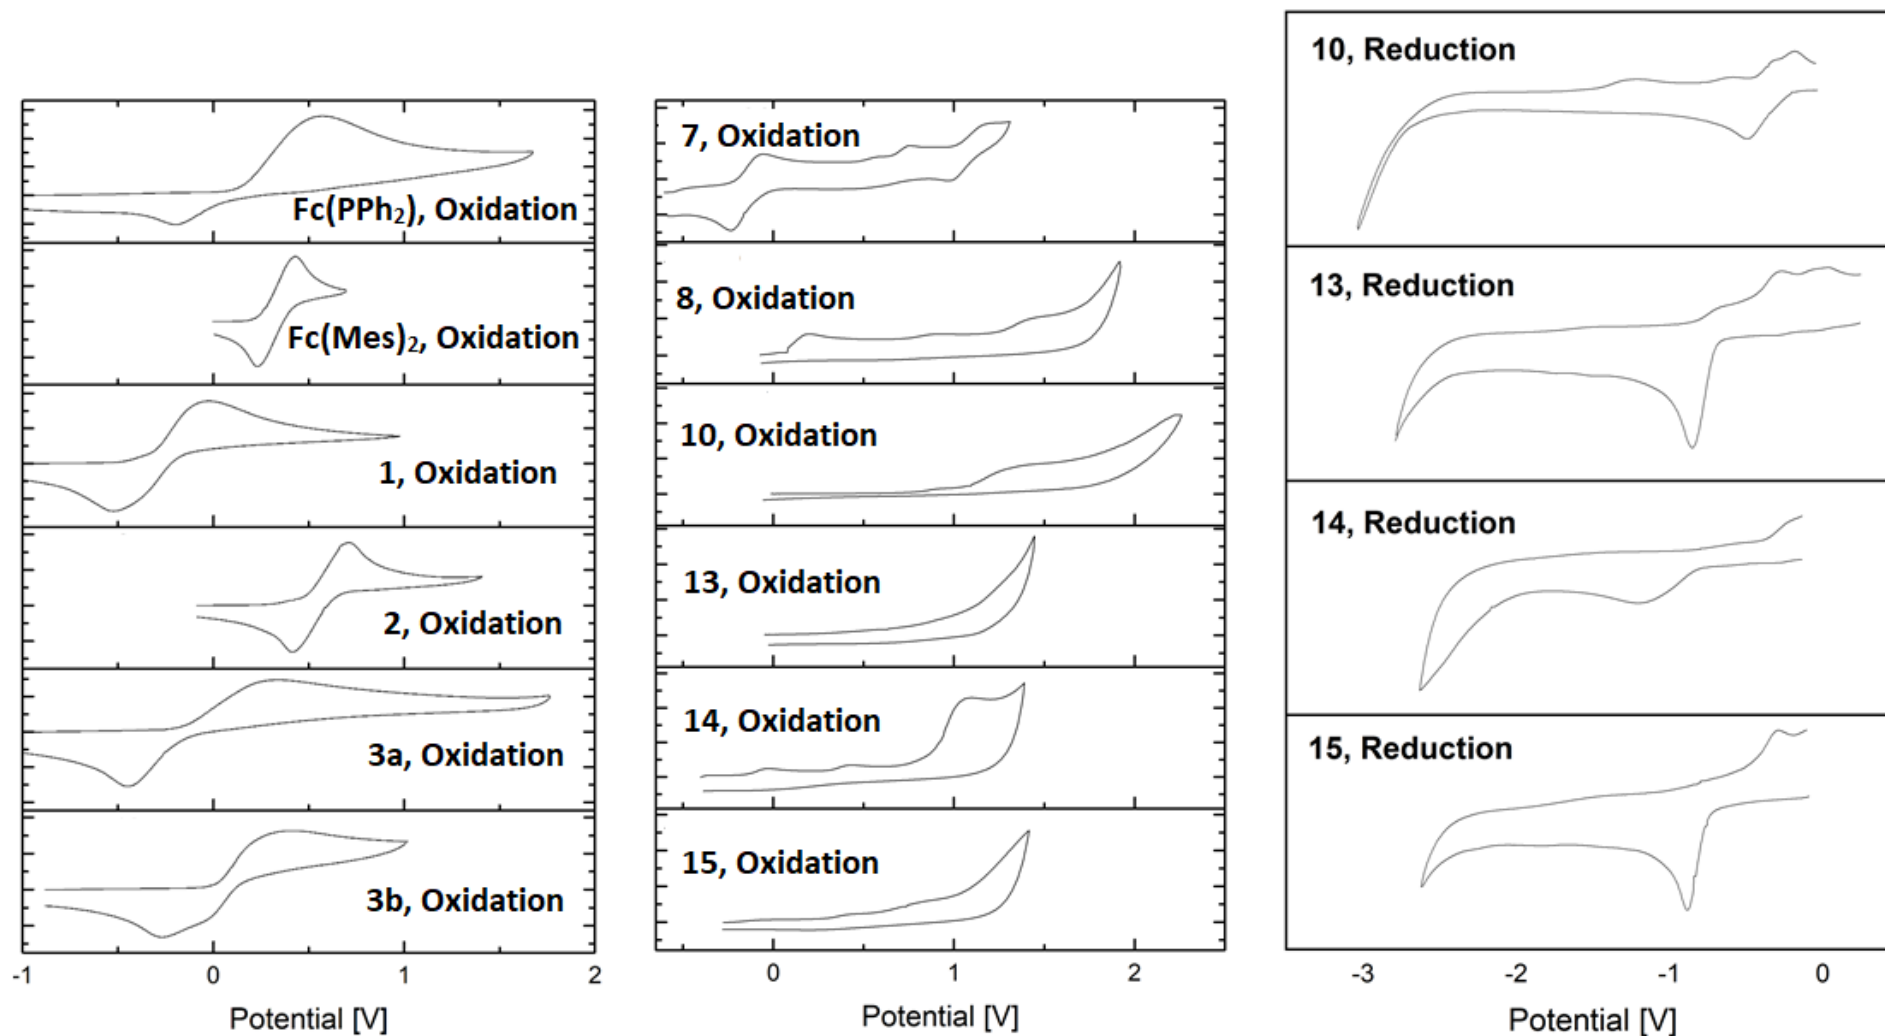

**Fig S1.** Cyclic voltammetry of Fc(PPh<sub>2</sub>), Fc(PMes<sub>2</sub>), **1-3**, **7**, **8**, **10** and **13-15**.

The oxidation and reduction potentials were measured with voltage sweep 250 mV/s in DCM and thf, respectively. The oxidation and reduction potentials are 0.573 and -0.202 V for Fc(PPh<sub>2</sub>);<sup>10</sup> 0.434 and 0.230 V for Fc(PMes<sub>2</sub>); 0.022 and -0.522 V for **1**; 0.712 and -0.413 V for **2**; 0.340 and -0.454 V for **3a**; 0.408 and -0.267 V for **3b**; -0.085 and -0.239 V for **7**. The potential for irreversible oxidation for compounds **8** and **14** are 0.147 V and 1.102 V, respectively. The reductions potentials for **10**, **13**, **14**, and **15** are -0.495 V, -0.849 V, -1.204 V and -0.885 V, respectively. All the measurements were referenced versus FcMe<sub>10</sub>/FcMe<sub>10</sub><sup>+</sup>. As compounds **11** and **12** could not be obtained as analytically pure forms no cyclovoltammetry were performed on them.

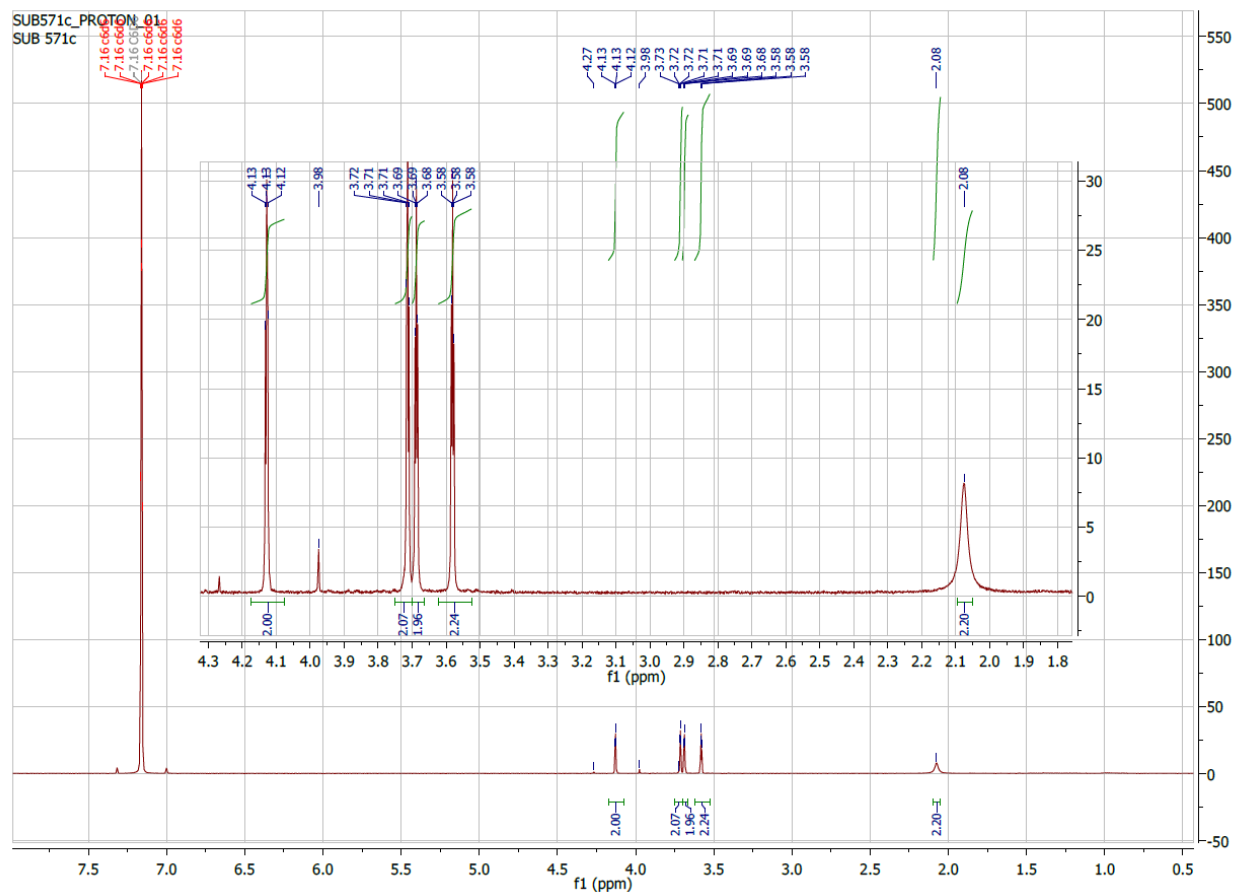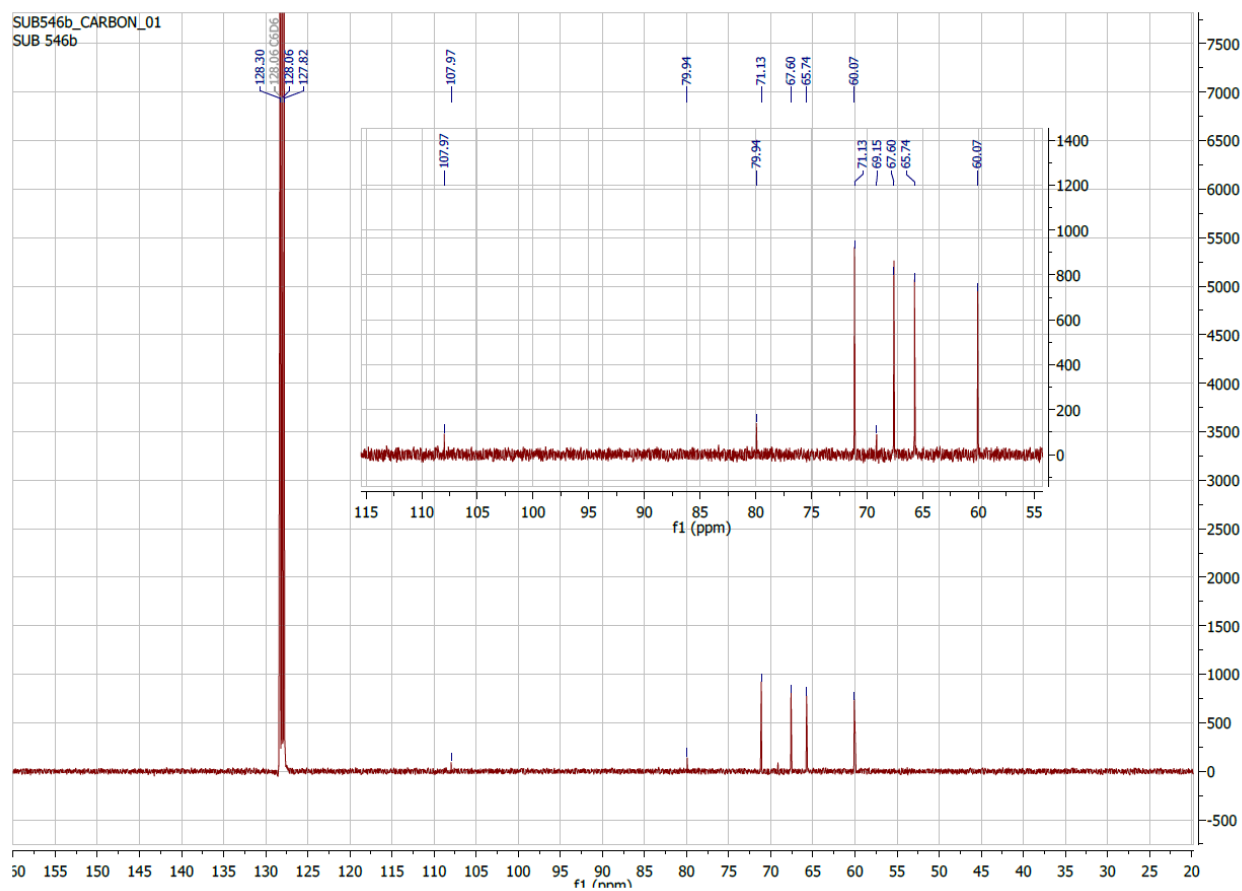

**Fig S2.**  $^1\text{H}$  and  $^{13}\text{C}$  NMR of  $\text{Fc}'(\text{NH}_2)\text{Br}$  (**1**), measured in  $\text{C}_6\text{D}_6$ .

The peak at  $\delta$  3.98 ppm is resulting from free cyclopentadienyl (Cp) ring of aminoferrocene, which is an impurity (varies between ca. 1-3%) present in this compound.



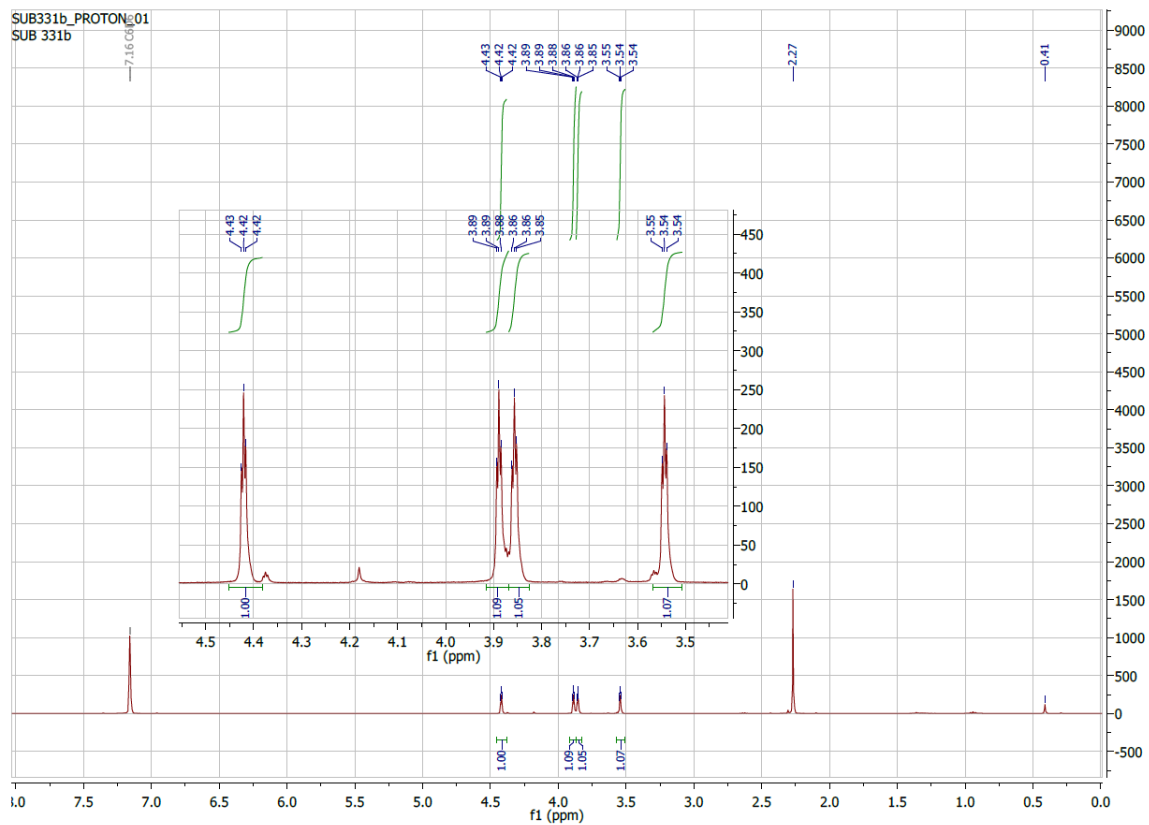

Fig S3.  $^1\text{H}$  NMR of  $\text{Fc}'(\text{NMe}_2)\text{Br}$  (**2**), measured in  $\text{C}_6\text{D}_6$ .

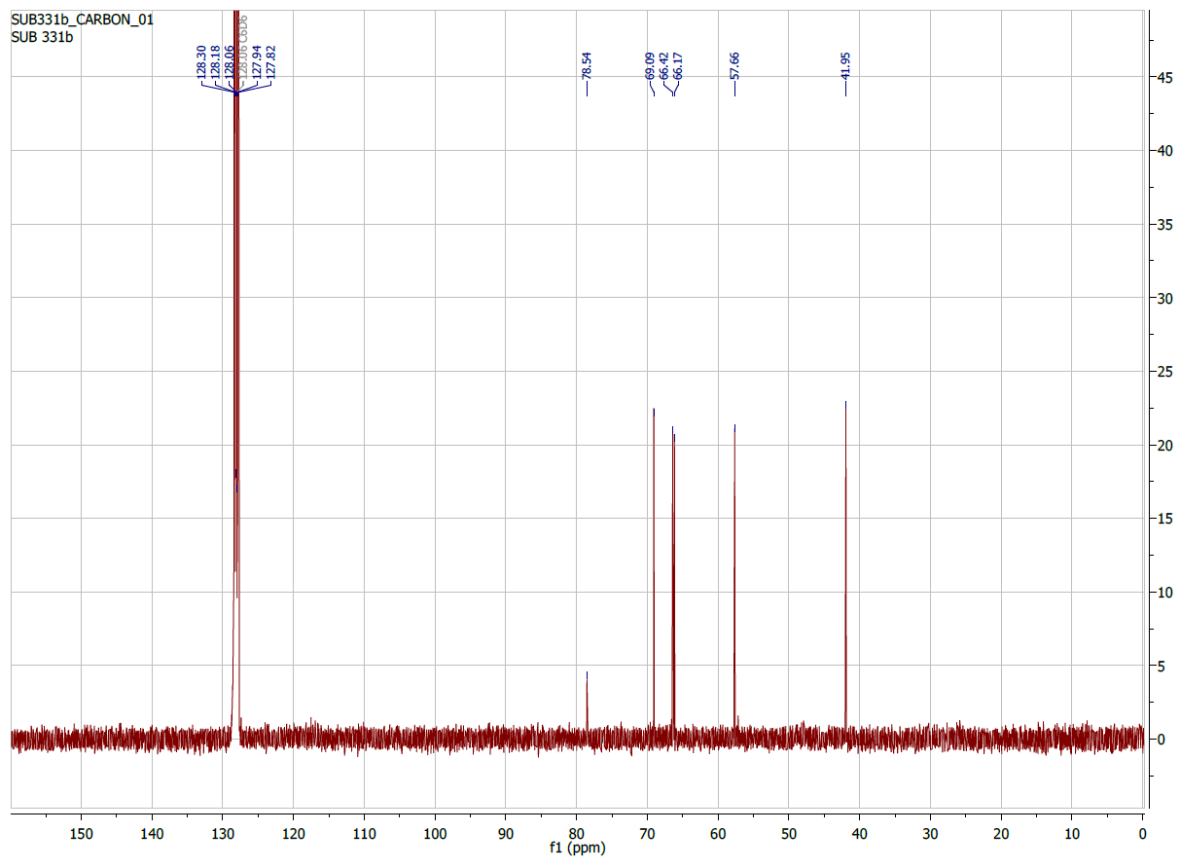

Fig S4.  $^{13}\text{C}$  NMR of  $\text{Fc}'(\text{NMe}_2)\text{Br}$  (**2**), measured in  $\text{C}_6\text{D}_6$ .

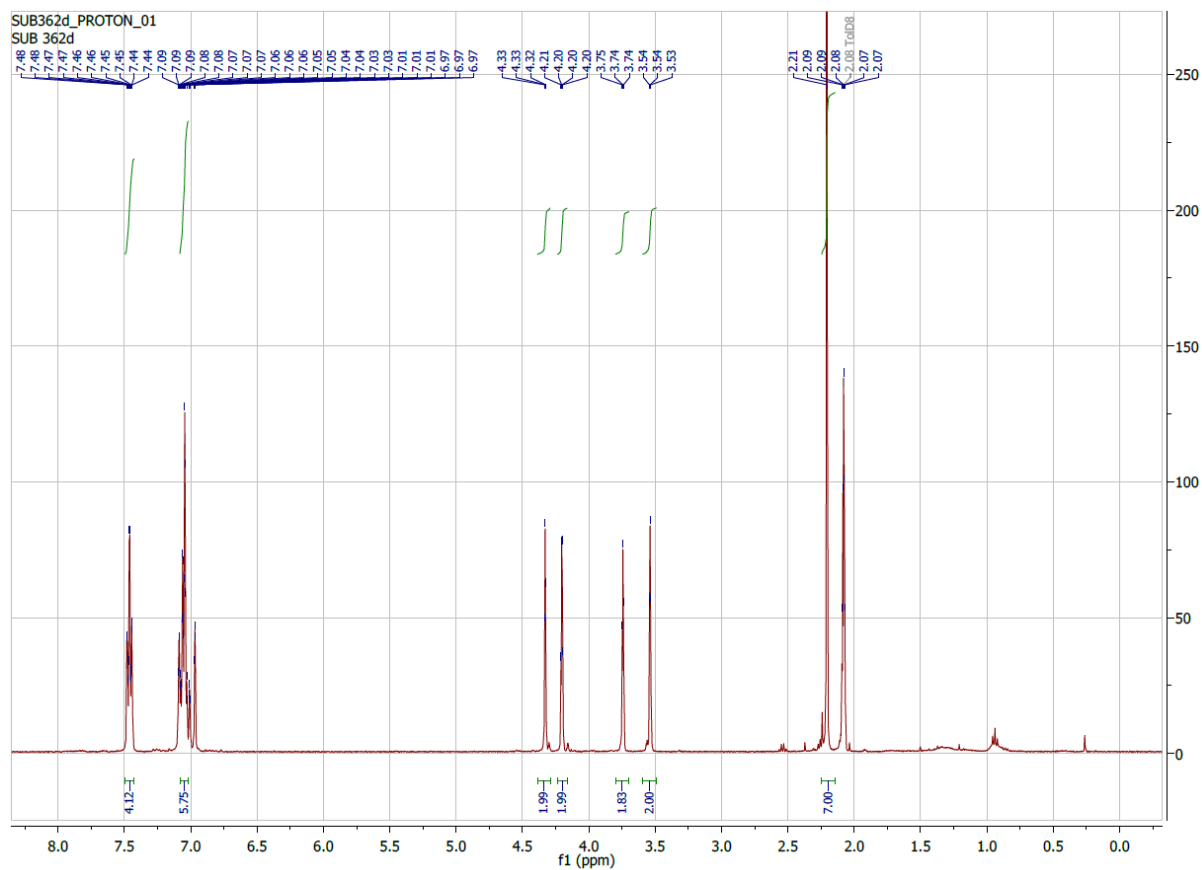

Fig S5.  $^1\text{H}$  NMR of  $\text{Fc}'(\text{NMe}_2)(\text{PPh}_2)$  (**3a**), measured in  $\text{Toluene-D}_8$ .

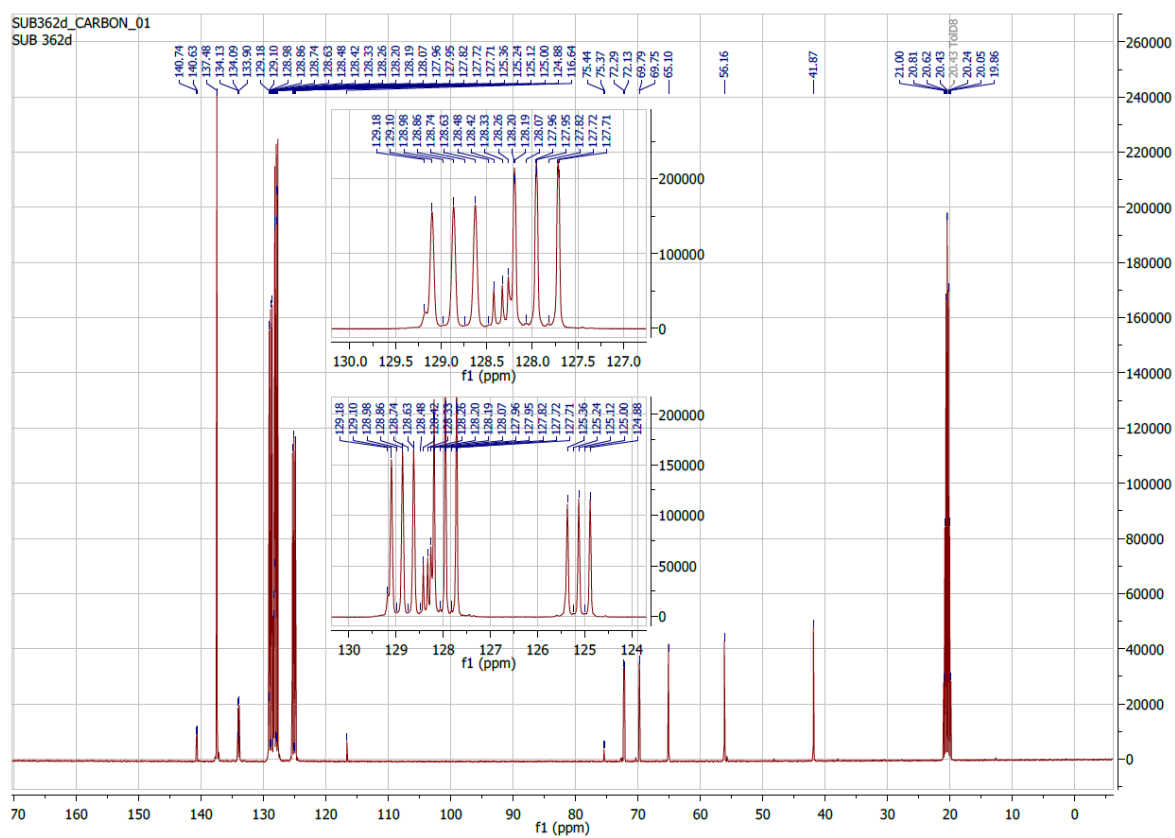

Fig S6.  $^{13}\text{C}$  NMR of  $\text{Fc}'(\text{NMe}_2)(\text{PPh}_2)$  (**3a**), measured in  $\text{Toluene-D}_8$ .

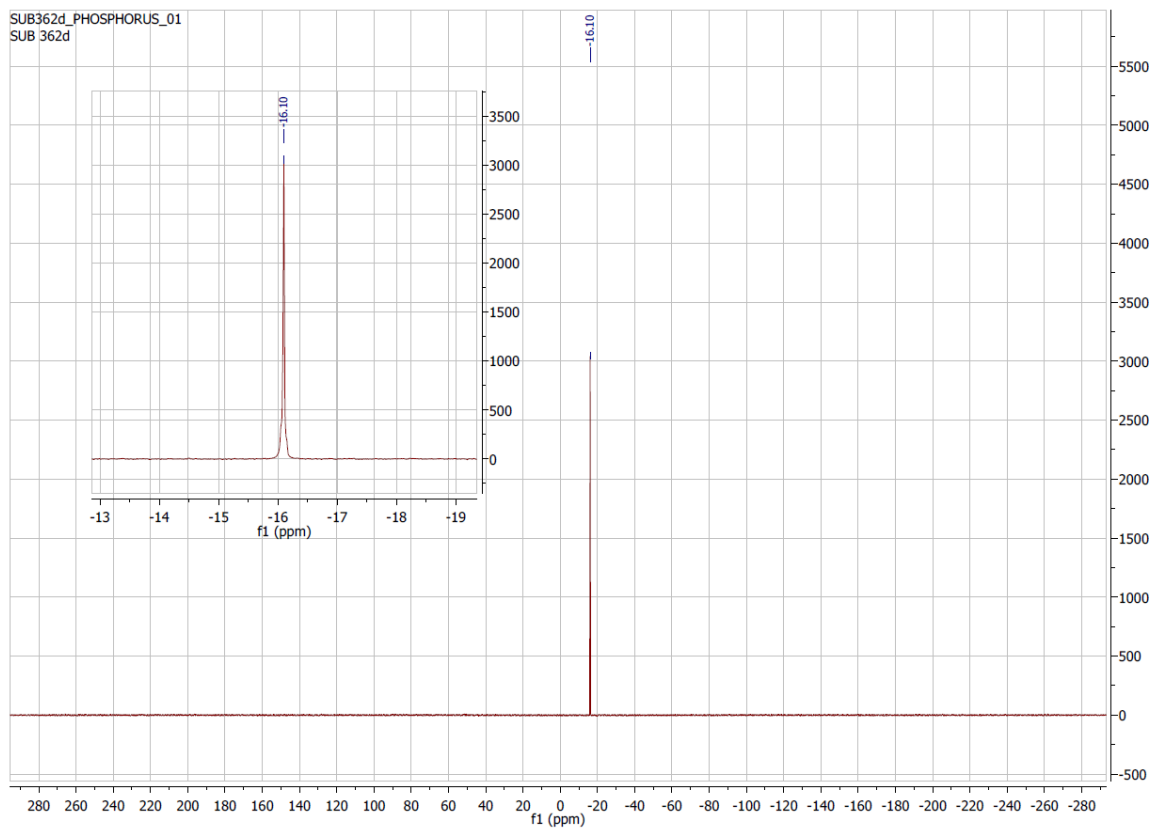

Fig S7.  $^{31}\text{P}$   $\{^1\text{H}\}$  NMR of  $\text{Fc}'(\text{NMe}_2)(\text{PPh}_2)$  (**3a**), measured in Toluene  $\text{D}_8$ .

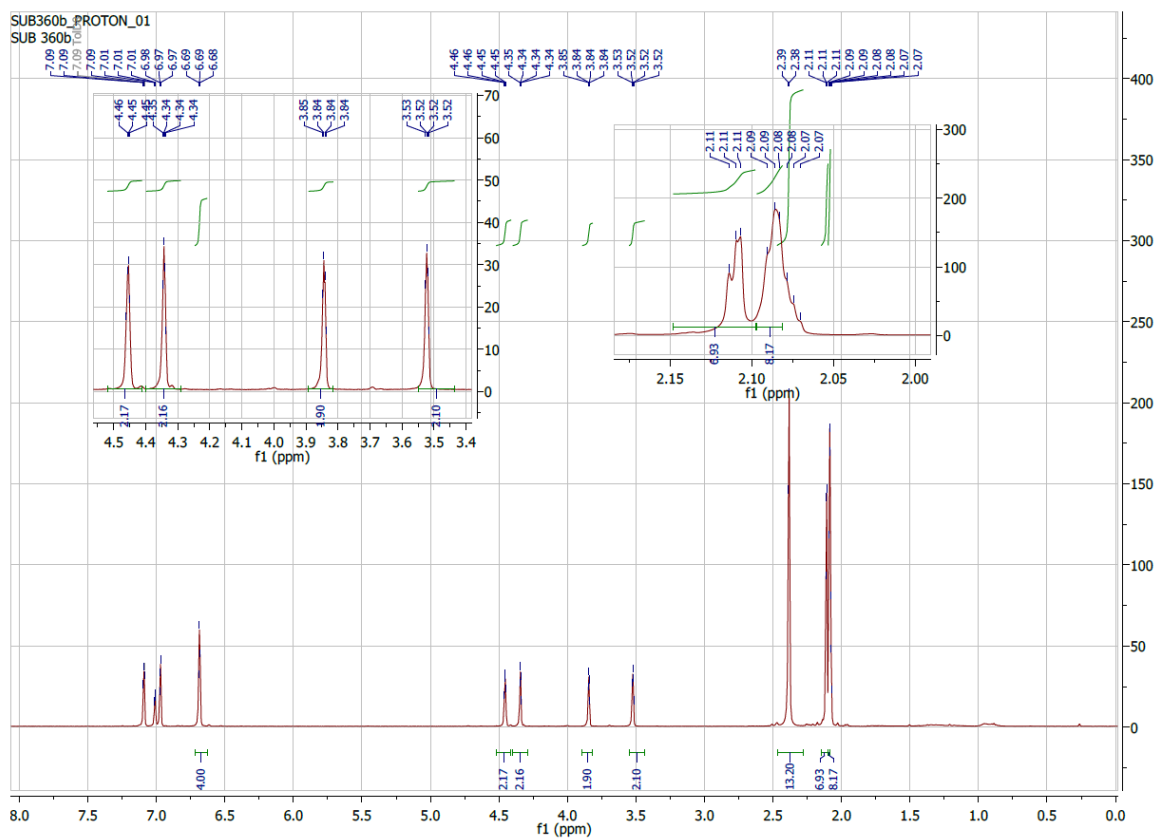

Fig S8.  $^1\text{H}$  NMR of  $\text{Fc}'(\text{NMe}_2)(\text{PMe}_2)$  (**3b**), measured in Toluene  $\text{D}_8$ .

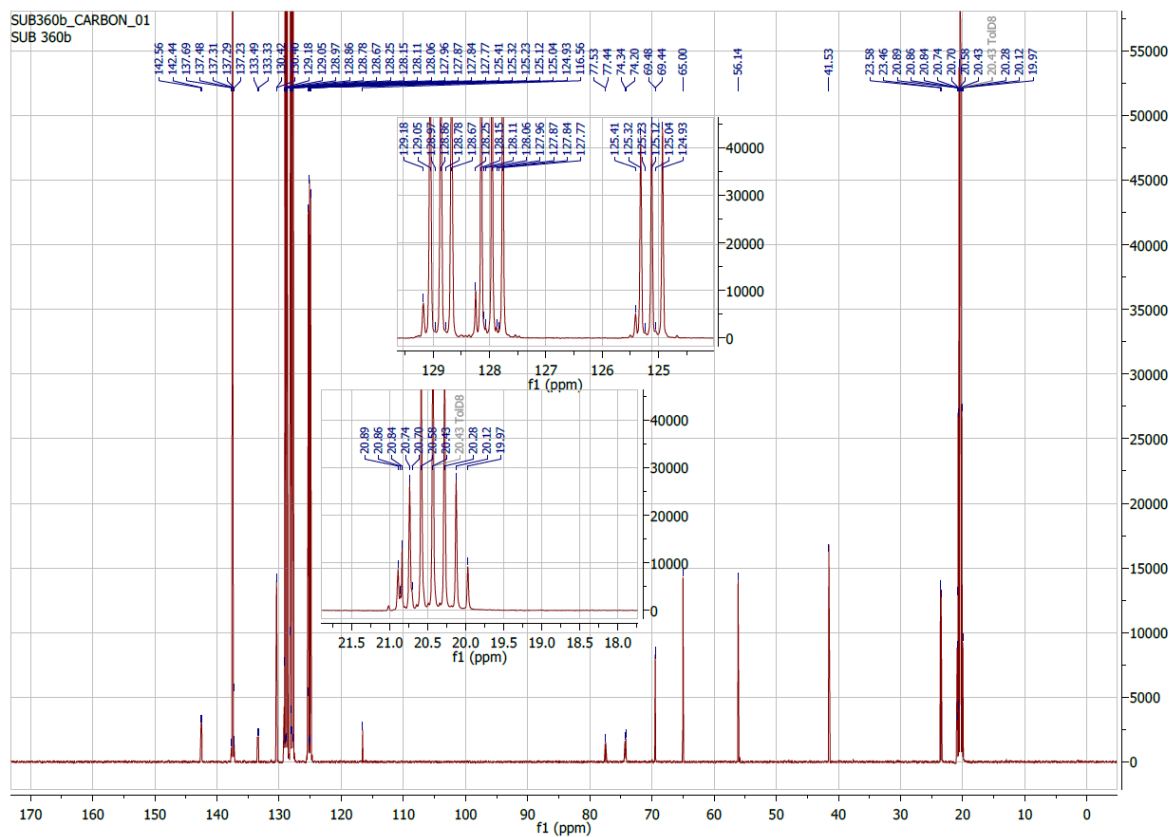

Fig S9.  $^{13}\text{C}$  NMR of  $\text{Fc}'(\text{NMe}_2)(\text{PMe}_2)$  (**3b**), measured in Toluene  $\text{D}_8$ .

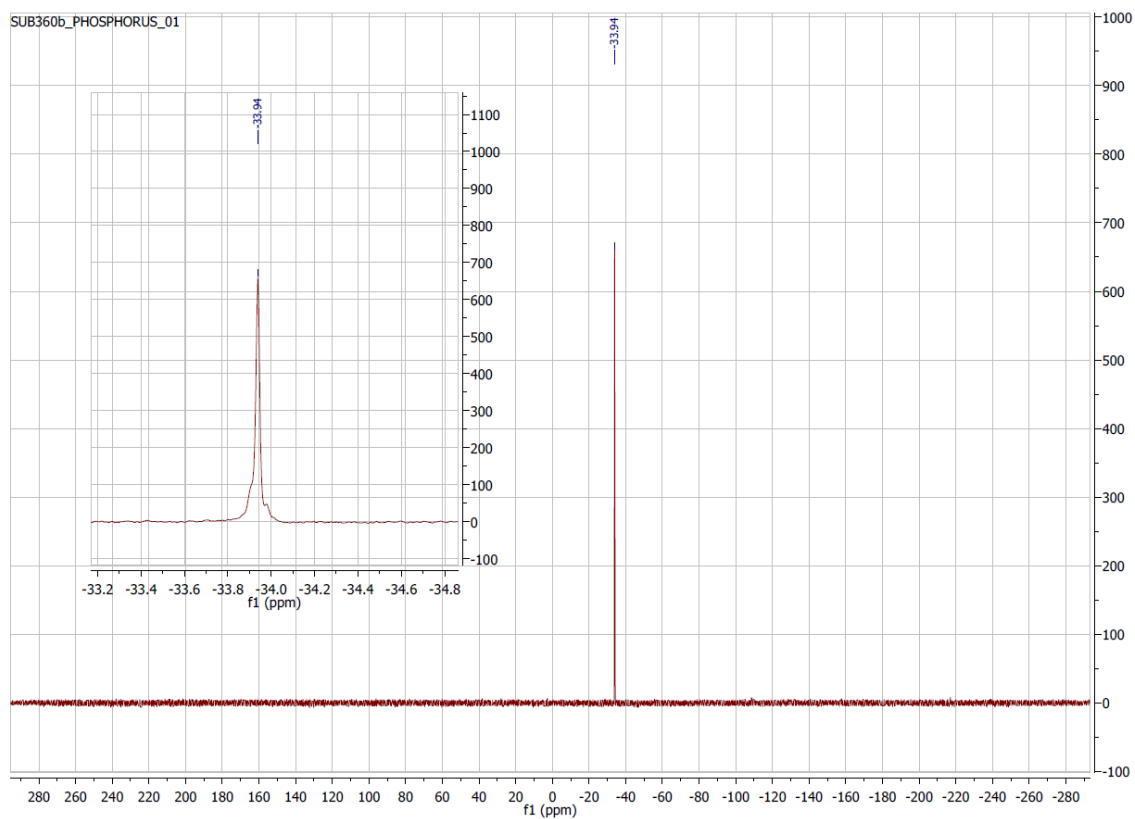

Fig S10.  $^{31}\text{P}$  NMR of  $\text{Fc}'(\text{NMe}_2)(\text{PMe}_2)$  (**3b**), measured in Toluene  $\text{D}_8$ .

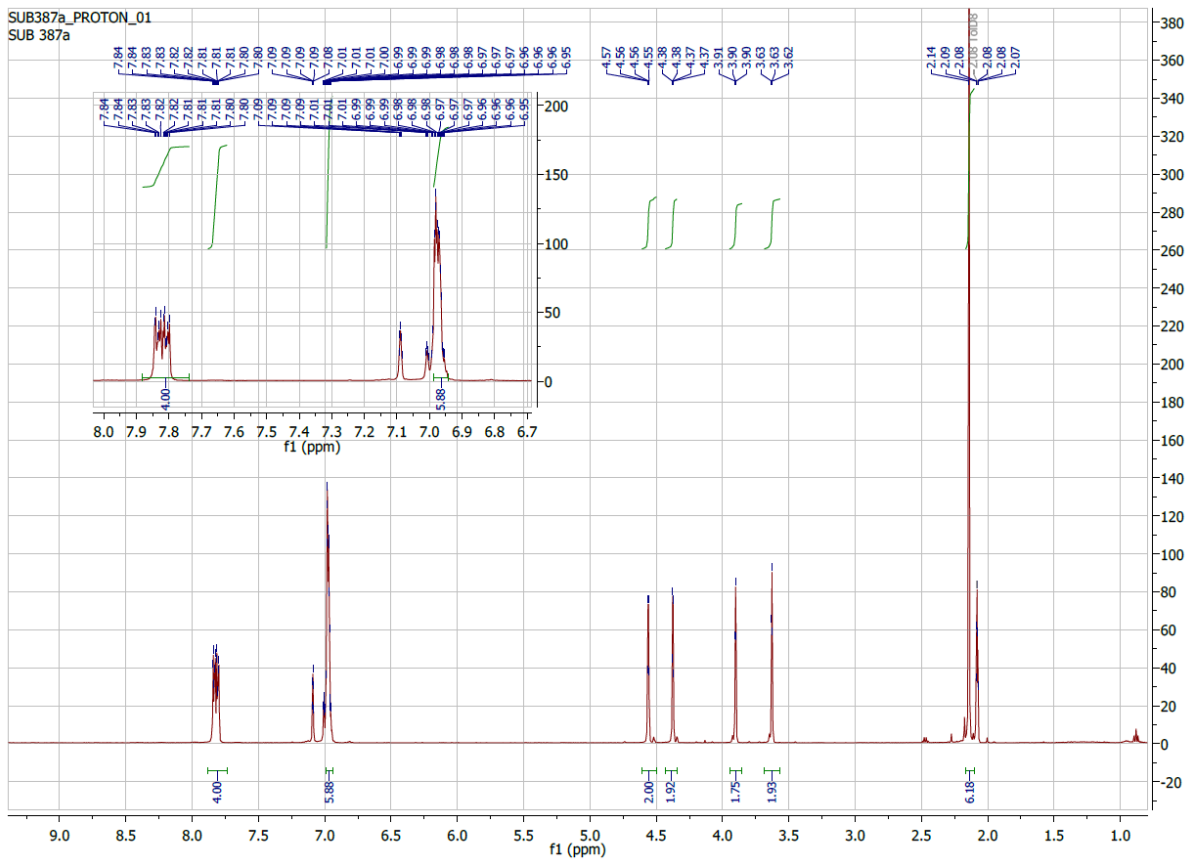

Fig S11.  $^1\text{H}$  NMR of  $\text{Fc}'(\text{NMe}_2)(\text{PSePh}_2)$  (**4a**), measured in Toluene  $\text{D}_8$ .

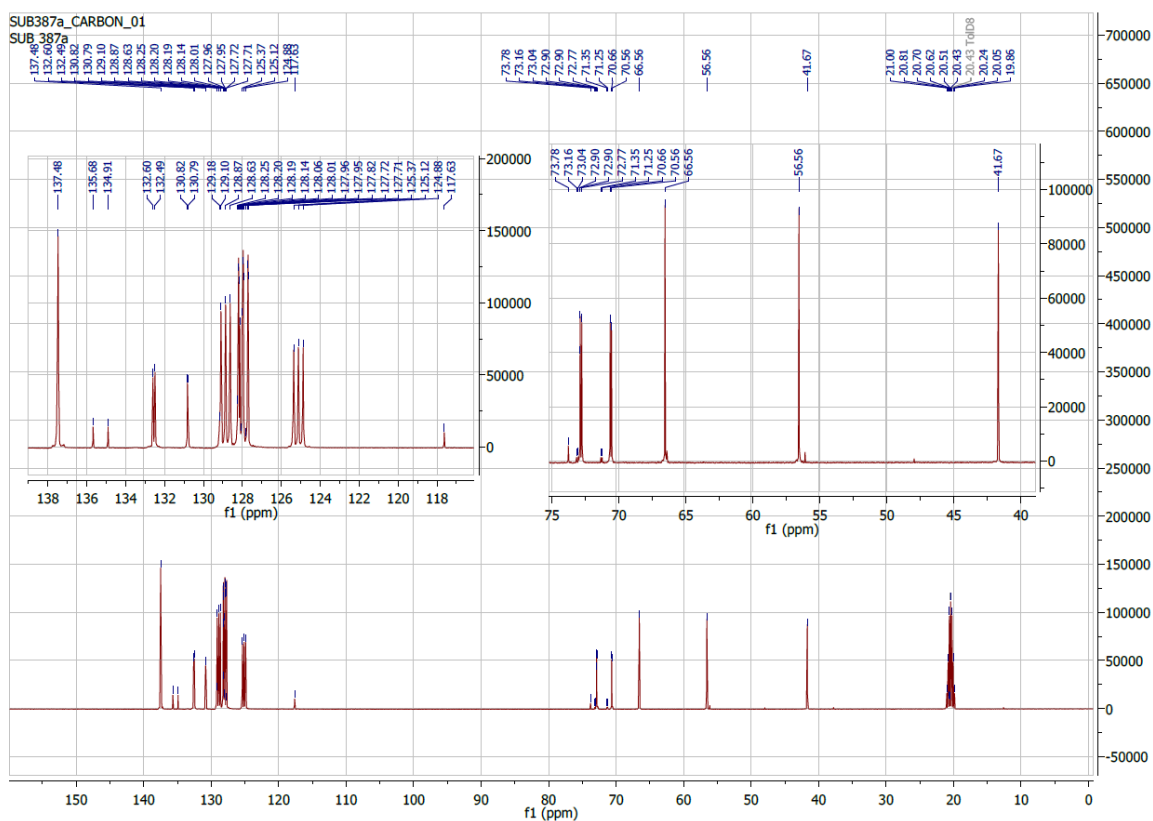

Fig S12.  $^{13}\text{C}$  NMR of  $\text{Fc}'(\text{NMe}_2)(\text{PSePh}_2)$  (**4a**), measured in Toluene  $\text{D}_8$ .

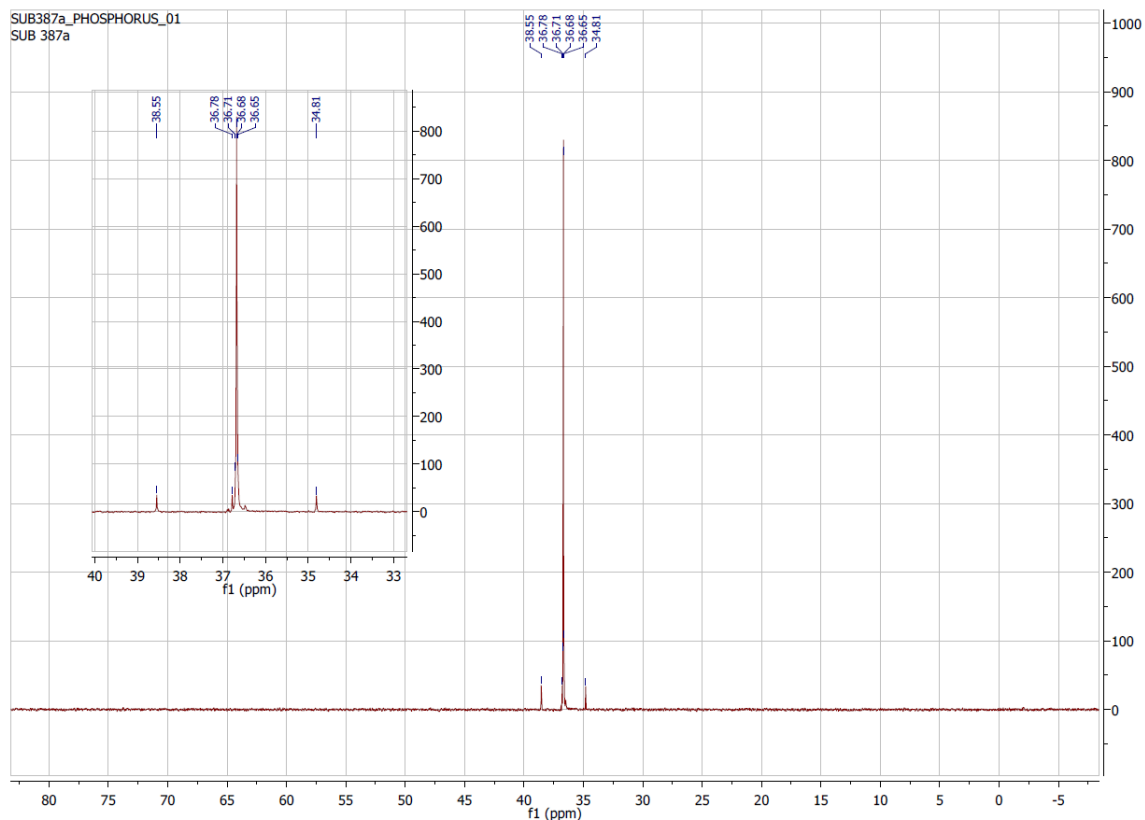

**Fig S13.**  $^{31}\text{P}$  NMR of  $\text{Fc}'(\text{NMe}_2)(\text{PSePh}_2)$  (**4a**), measured in Toluene  $\text{D}_8$ .

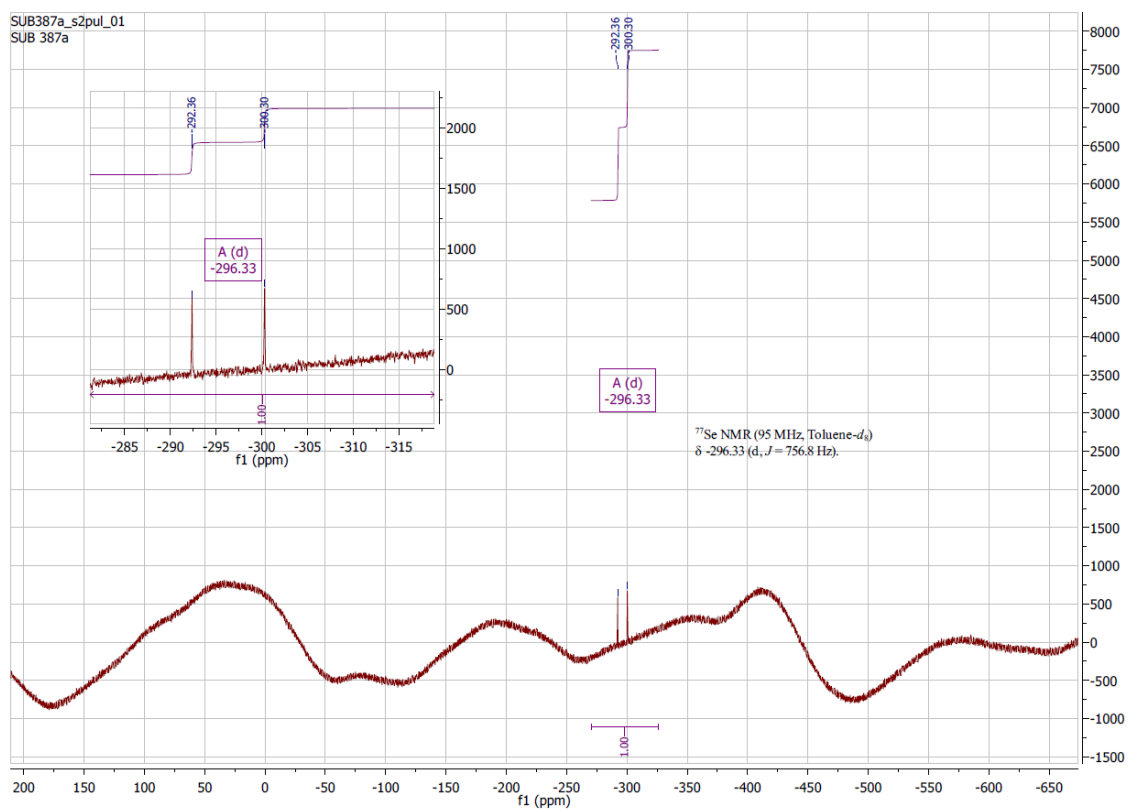

**Fig S14.**  $^{77}\text{Se}$  NMR of  $\text{Fc}'(\text{NMe}_2)(\text{PSePh}_2)$  (**4a**), measured in Toluene  $\text{D}_8$ .



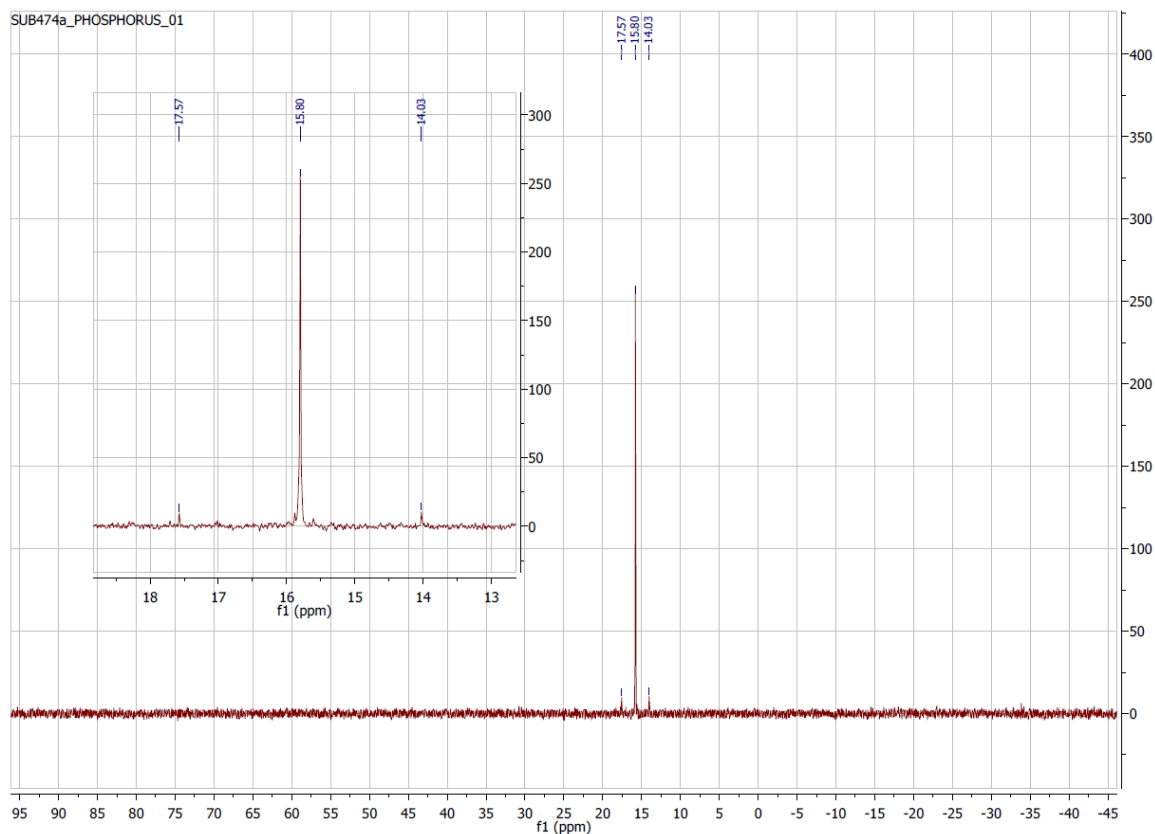

**Fig S17.**  $^{31}\text{P}$  NMR of  $\text{Fc}'(\text{NMe}_2)(\text{PSeMe}_2)$  (**4b**), measured in Toluene  $\text{D}_8$ .

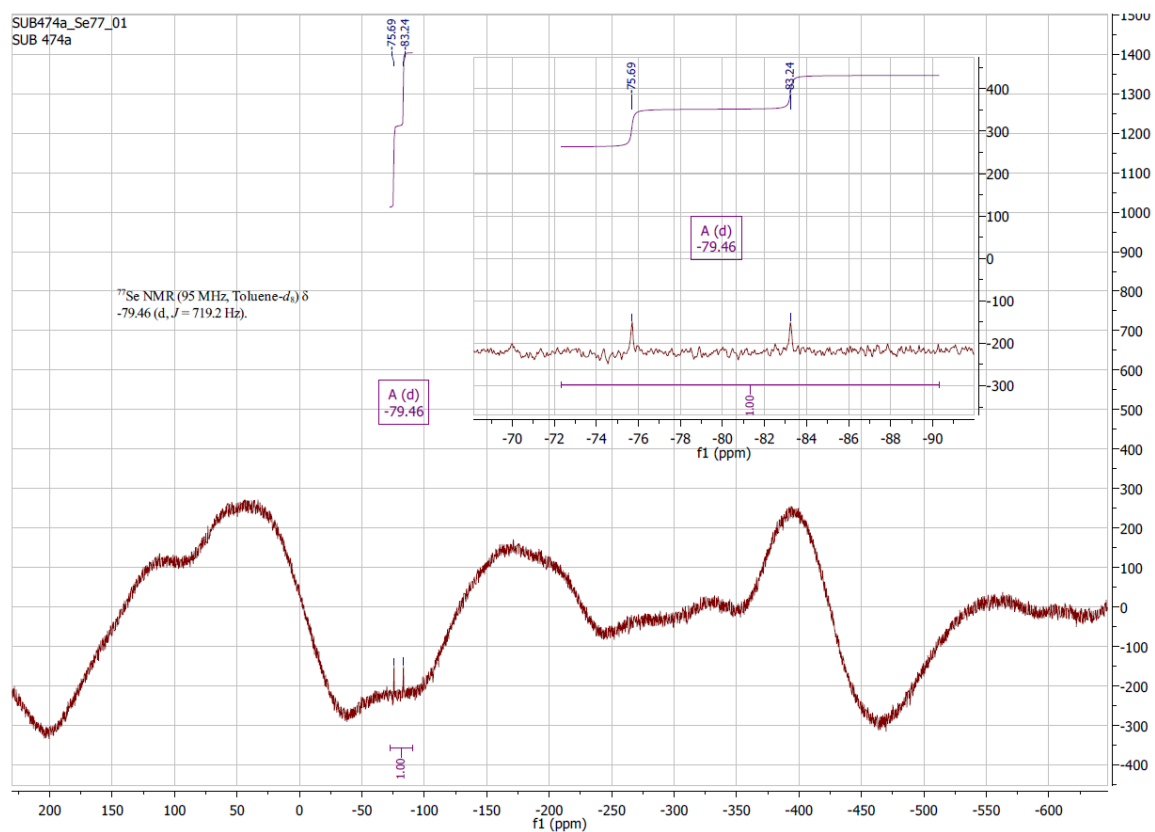

**Fig S18.**  $^{77}\text{Se}$  NMR of  $\text{Fc}'(\text{NMe}_2)(\text{PSeMe}_2)$  (**4b**), measured in Toluene  $\text{D}_8$ .



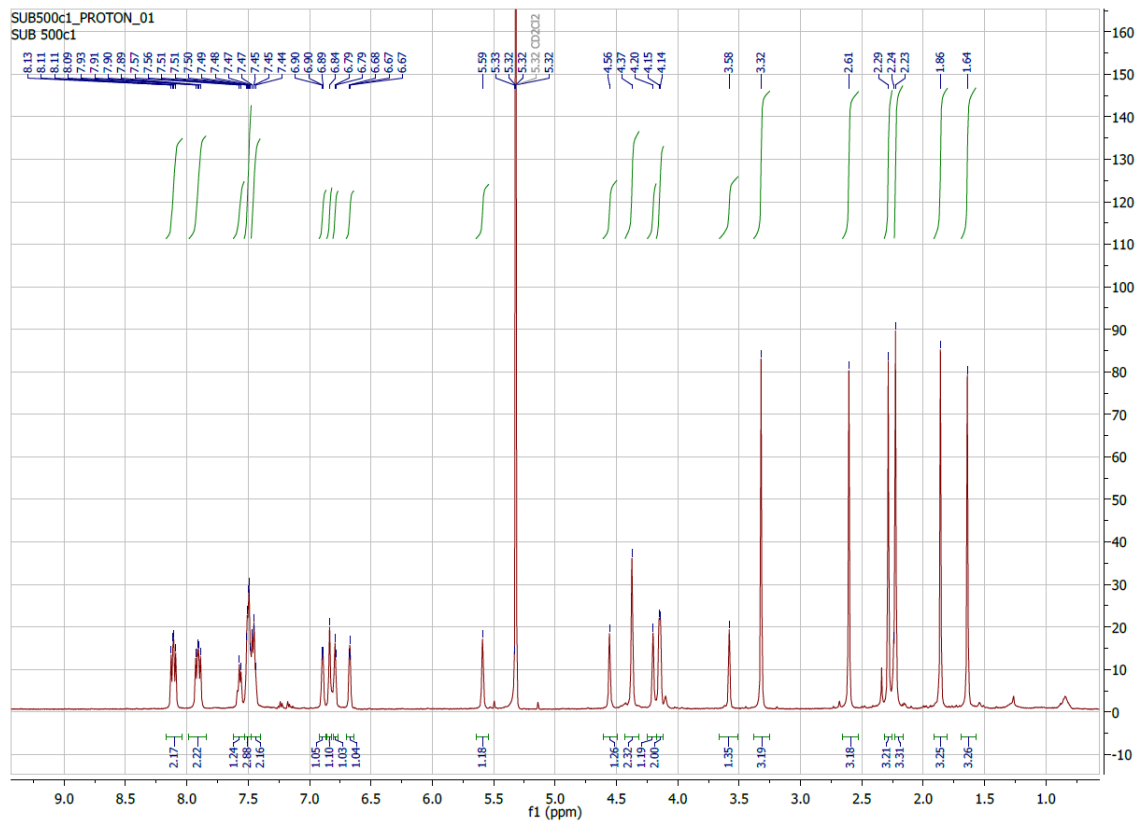

Fig S19.  $^1\text{H}$  NMR of  $[\text{Fc}'(\text{PMe}_2)(\text{PPh}_2) \cdot \text{PdCl}_2]$  (**7**), measured in  $\text{CD}_2\text{Cl}_2$ .

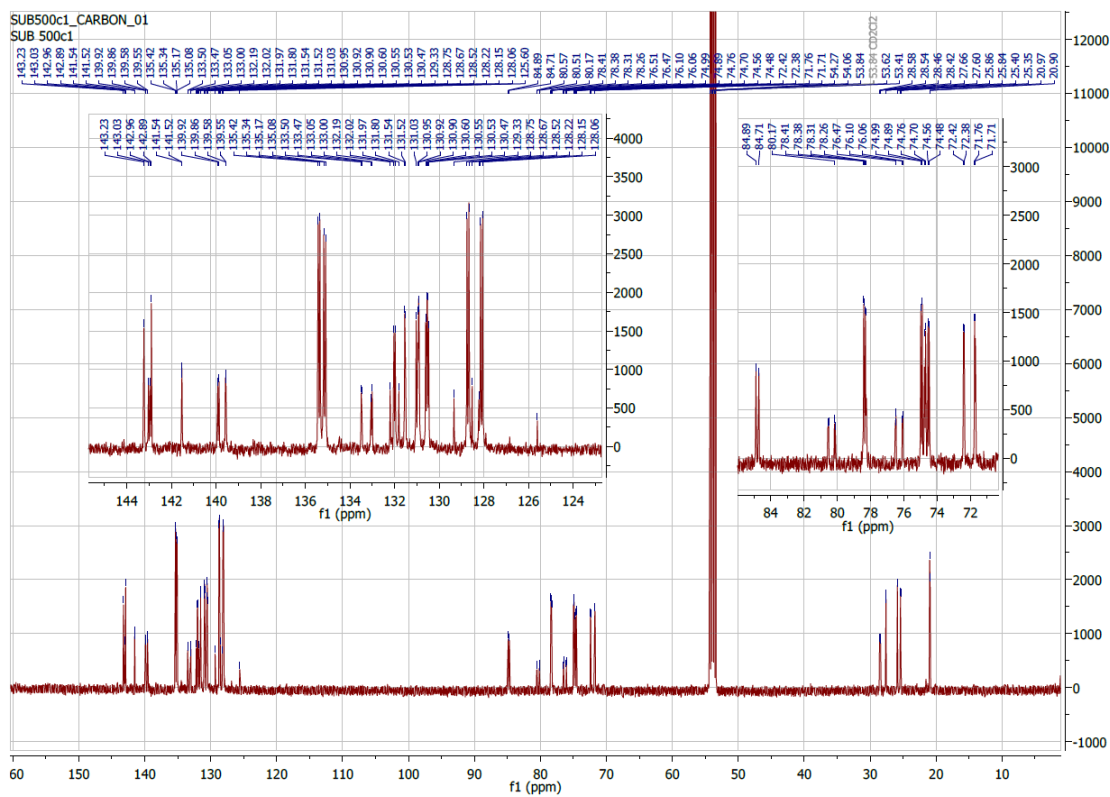

Fig S20.  $^{13}\text{C}$  NMR of  $[\text{Fc}'(\text{PMe}_2)(\text{PPh}_2) \cdot \text{PdCl}_2]$  (**7**), measured in  $\text{CD}_2\text{Cl}_2$ .

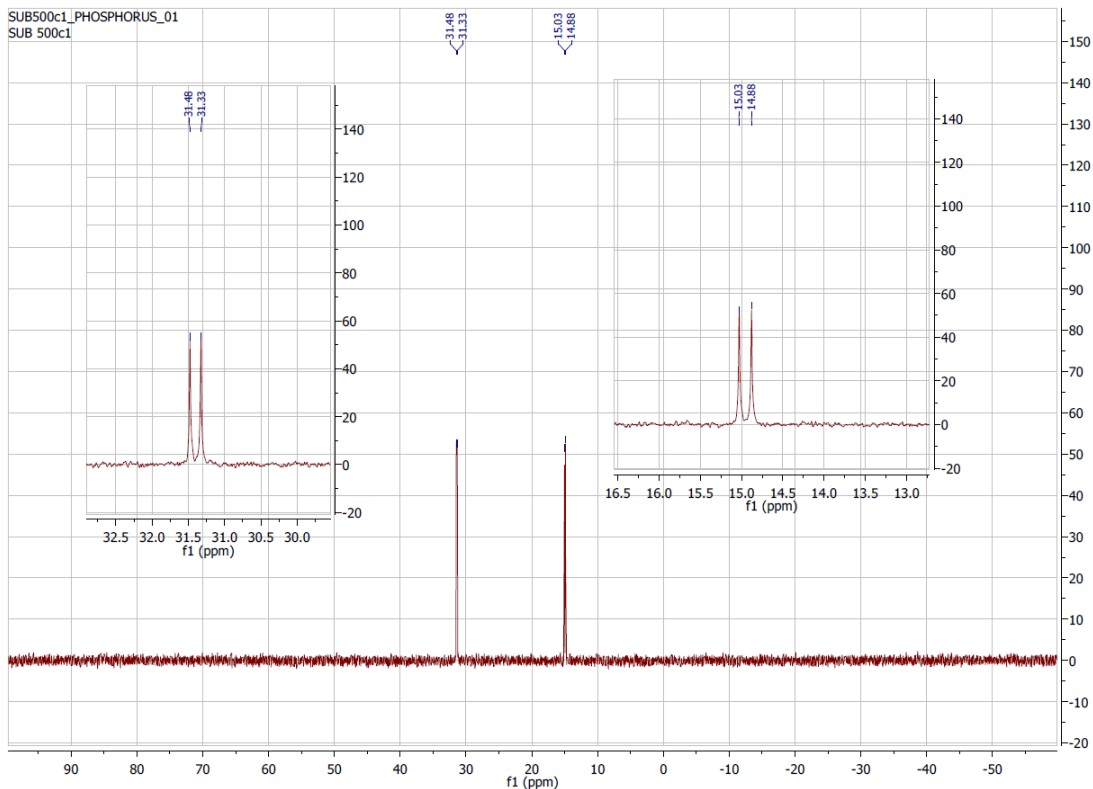

Fig S21.  $^{31}\text{P}$   $\{^1\text{H}\}$  NMR of  $[\text{Fc}'(\text{PMe}_2)(\text{PPh}_2) \cdot \text{PdCl}_2]$  (**7**), measured in  $\text{CD}_2\text{Cl}_2$ .

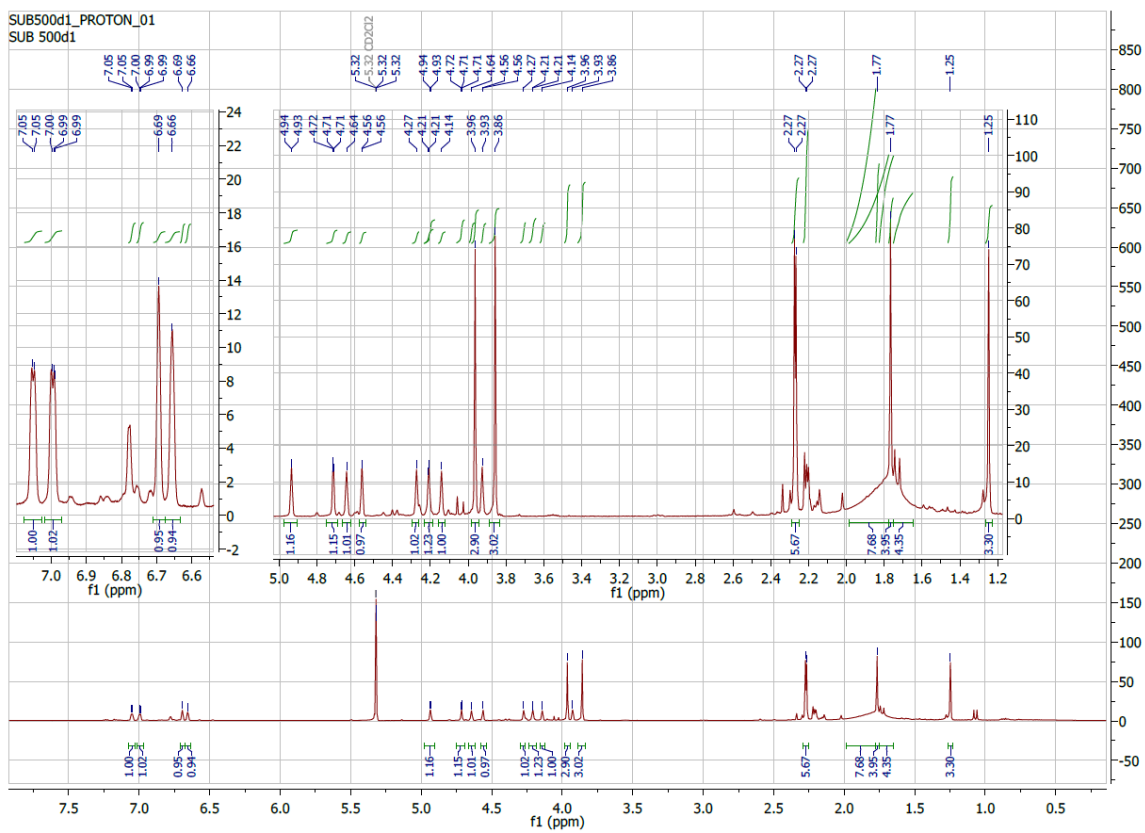

Fig S22.  $^1\text{H}$  NMR of  $[\text{Fc}'(\text{PMe}_2)(\text{P}^t\text{Bu}_2) \cdot \text{PdCl}_2]$  (**8**), measured in  $\text{CD}_2\text{Cl}_2$ .

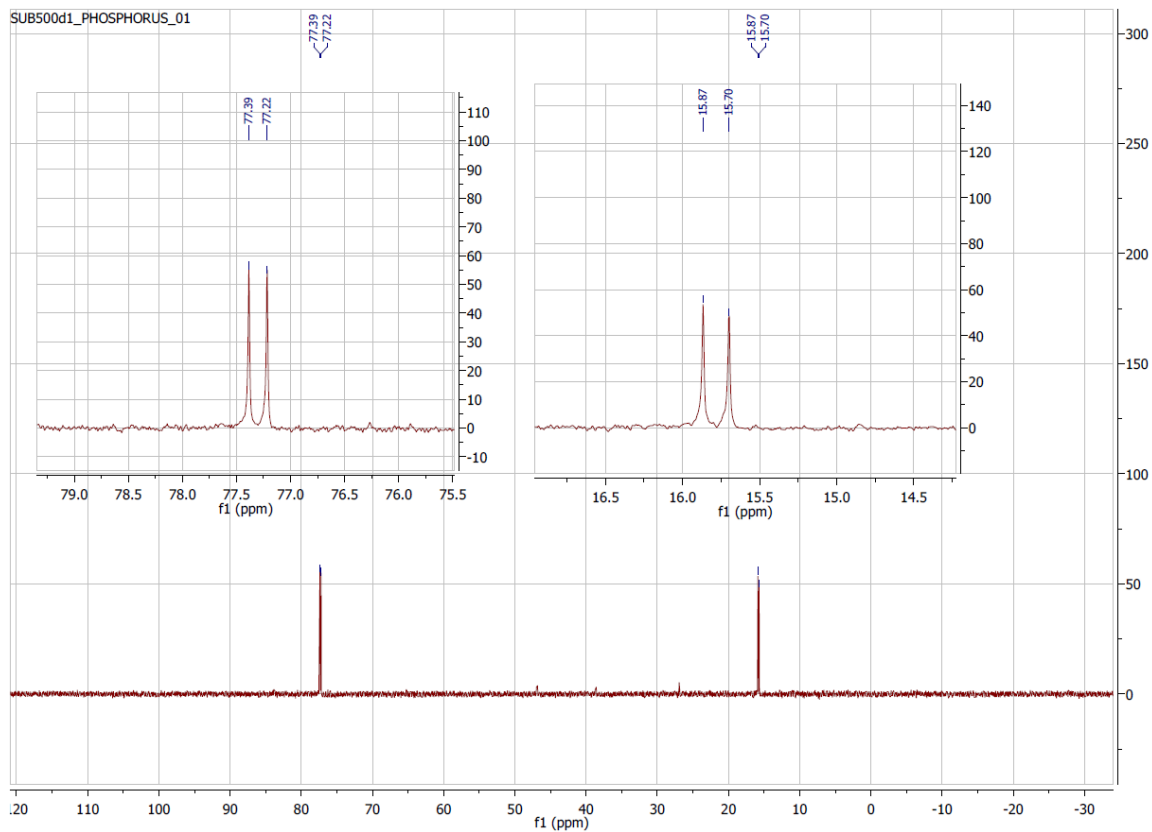

Fig S23.  $^{31}\text{P}$  NMR $\{^1\text{H}\}$  of  $[\text{Fc}'(\text{PMes}_2)(\text{P}^t\text{Bu}_2) \cdot \text{PdCl}_2]$  (**8**), measured in  $\text{CD}_2\text{Cl}_2$ .

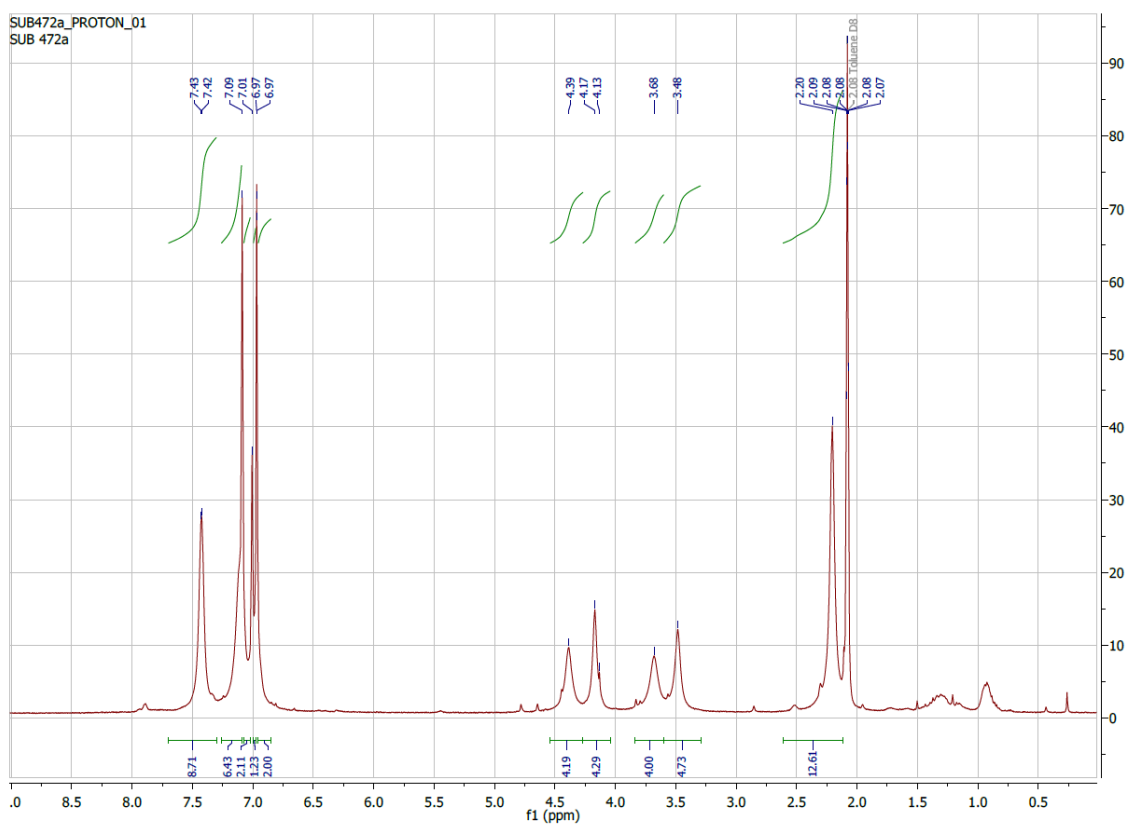

Fig S24.  $^1\text{H}$  NMR of  $[\text{Fc}'(\text{NMe}_2)(\text{PPh}_2) \cdot 0.5\text{PdCl}_2]$  (**9**), measured in Toluene  $\text{D}_8$ .

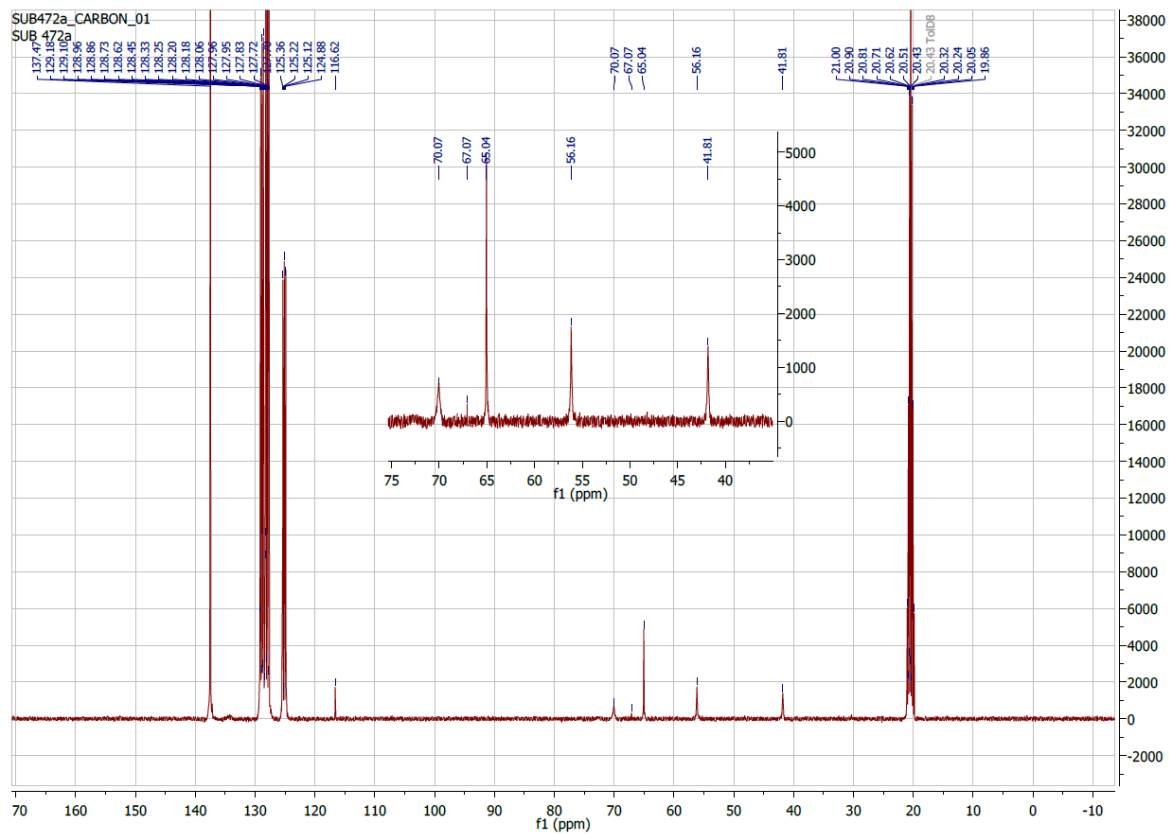

Fig S25.  $^{13}\text{C}$  NMR of  $[\text{Fc}'(\text{NMe}_2)(\text{PPh}_2) \cdot 0.5\text{PdCl}_2]$  (**9**), measured in Toluene  $\text{D}_8$ .

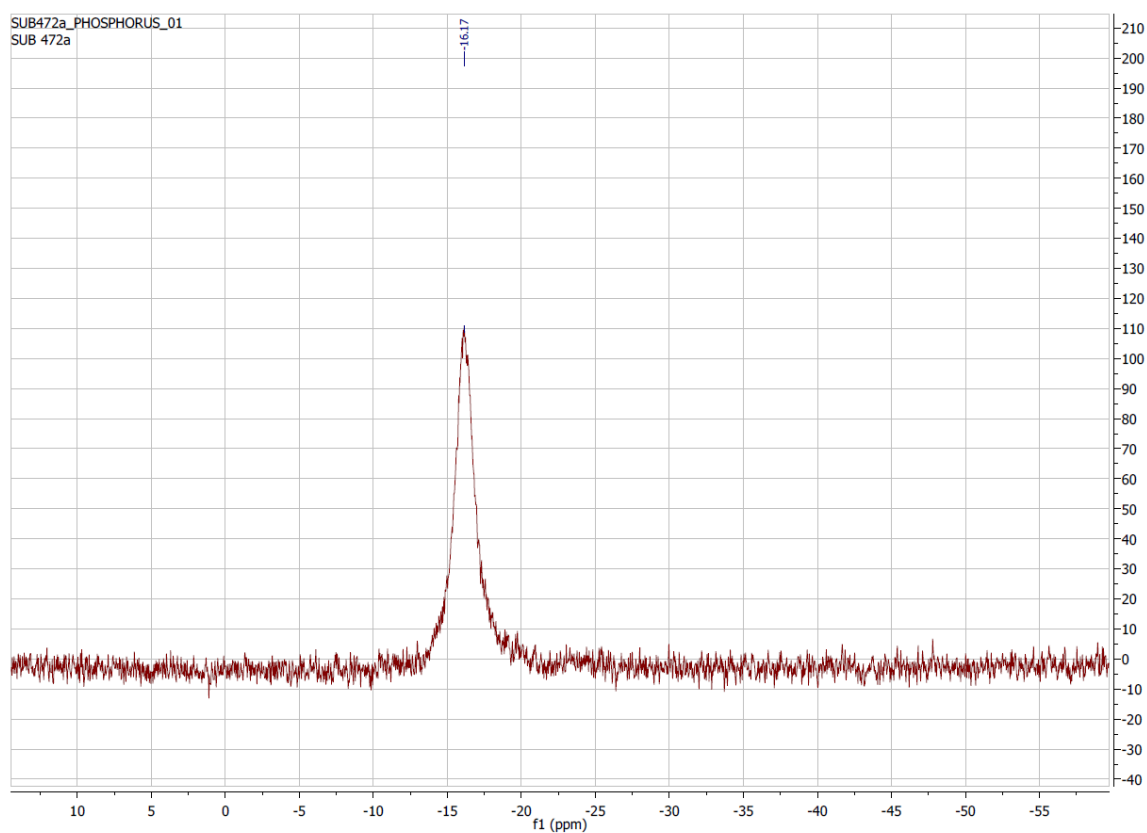

Fig S26.  $^{31}\text{P}\{^1\text{H}\}$  NMR of  $[\text{Fc}'(\text{NMe}_2)(\text{PPh}_2) \cdot 0.5\text{PdCl}_2]$  (**9**), measured in Toluene  $\text{D}_8$ .

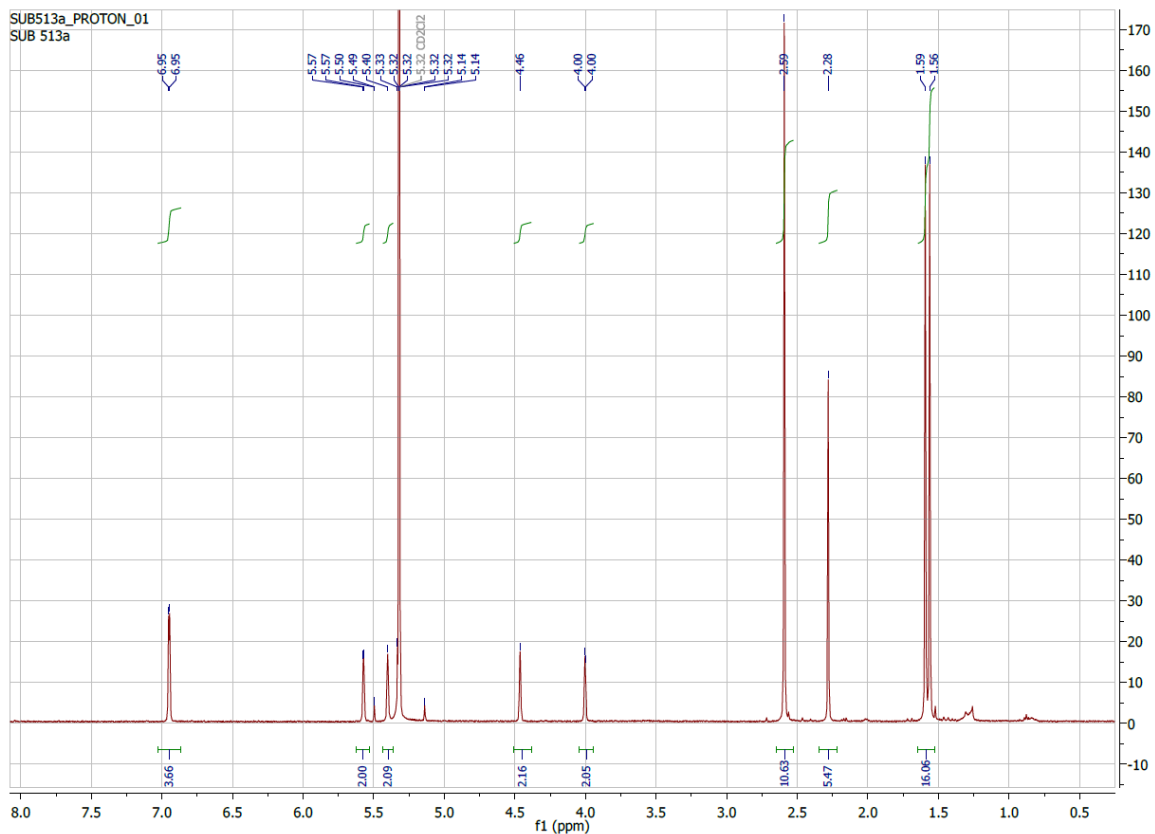

Fig S27.  $^1\text{H}$  NMR of  $[\text{Fc}'(\text{PMes}_2)(\text{P}^t\text{Bu}_2) \cdot \text{PdCl}][\text{SbF}_6]$  (**10**), measured in  $\text{CD}_2\text{Cl}_2$ .

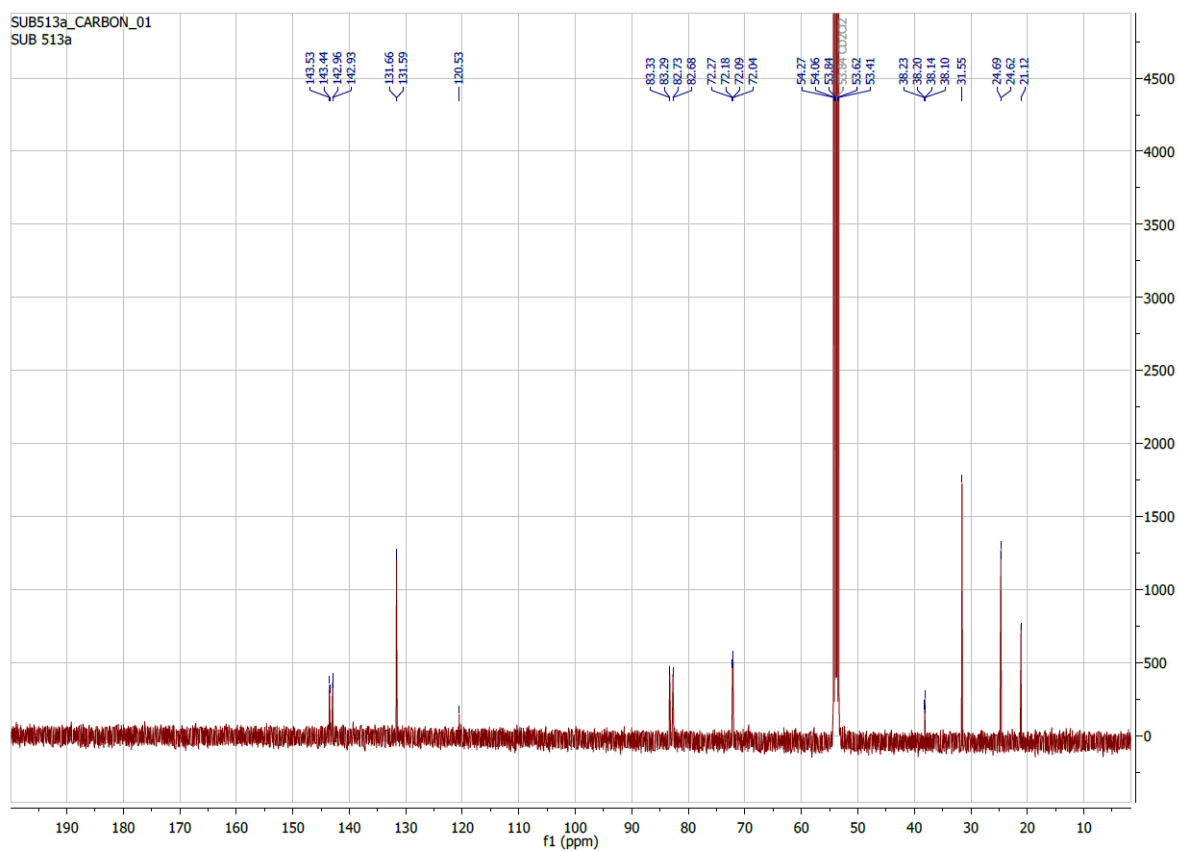

Fig S28.  $^{13}\text{C}$  NMR of  $[\text{Fc}'(\text{PMes}_2)(\text{P}^t\text{Bu}_2) \cdot \text{PdCl}][\text{SbF}_6]$  (**10**), measured in  $\text{CD}_2\text{Cl}_2$ .

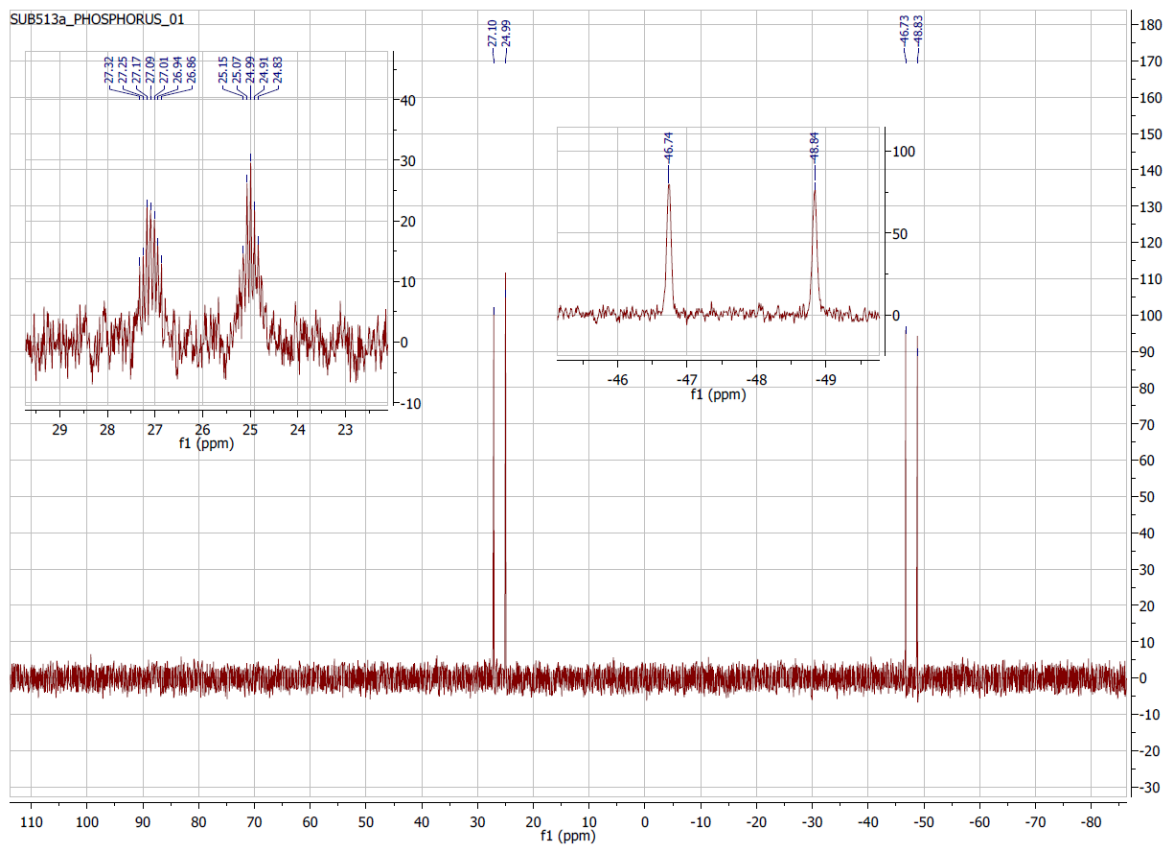

**Fig S29.**  $^{31}\text{P}\{^1\text{H}\}$  NMR of  $\text{Fc}^i(\text{PMe}_2)(\text{P}^t\text{Bu}_2)[\text{PdCl}][\text{SbF}_6]$  (**10**), measured in  $\text{CD}_2\text{Cl}_2$ . Corresponding peaks in  $^1\text{H}$  coupled  $^{31}\text{P}$  NMR are shown in insets.

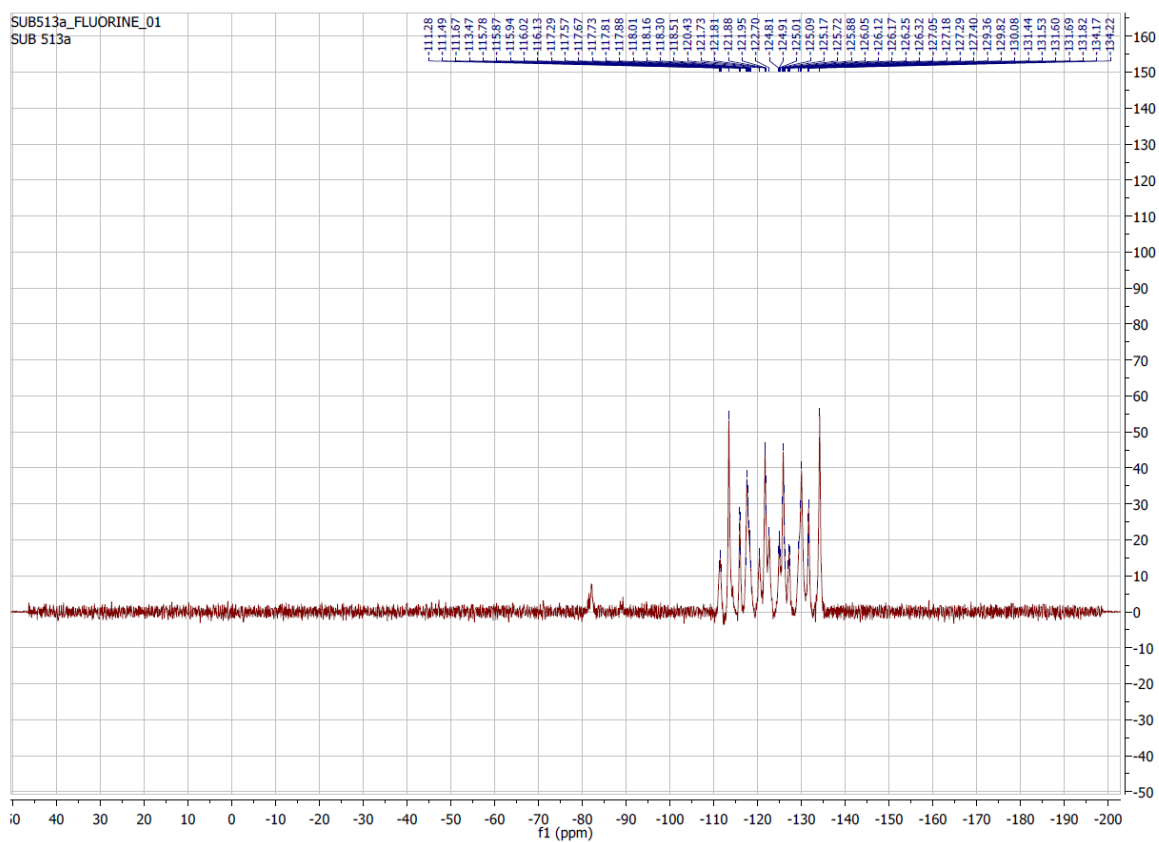

**Fig S30.**  $^{19}\text{F}$  NMR of  $[\text{Fc}^i(\text{PMe}_2)(\text{P}^t\text{Bu}_2) \cdot \text{PdCl}][\text{SbF}_6]$  (**10**), measured in  $\text{CD}_2\text{Cl}_2$ .

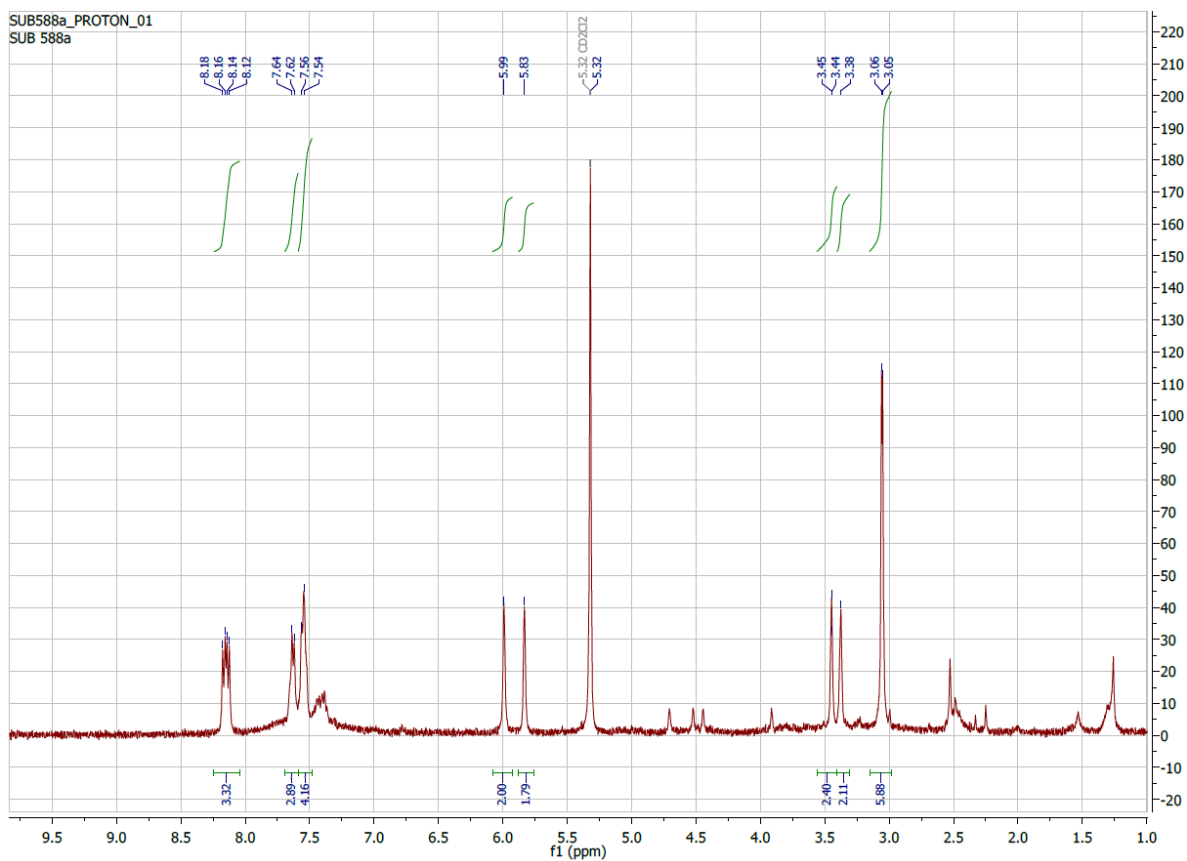

**Fig S31.** <sup>1</sup>H NMR of [Fc'(NMe<sub>2</sub>)(PPh<sub>2</sub>)·PdCl][SbF<sub>6</sub>]<sub>2</sub> (**11**), measured in CD<sub>2</sub>Cl<sub>2</sub>. Compound **11** contains impurities which could not be removed after several recrystallization attempts.

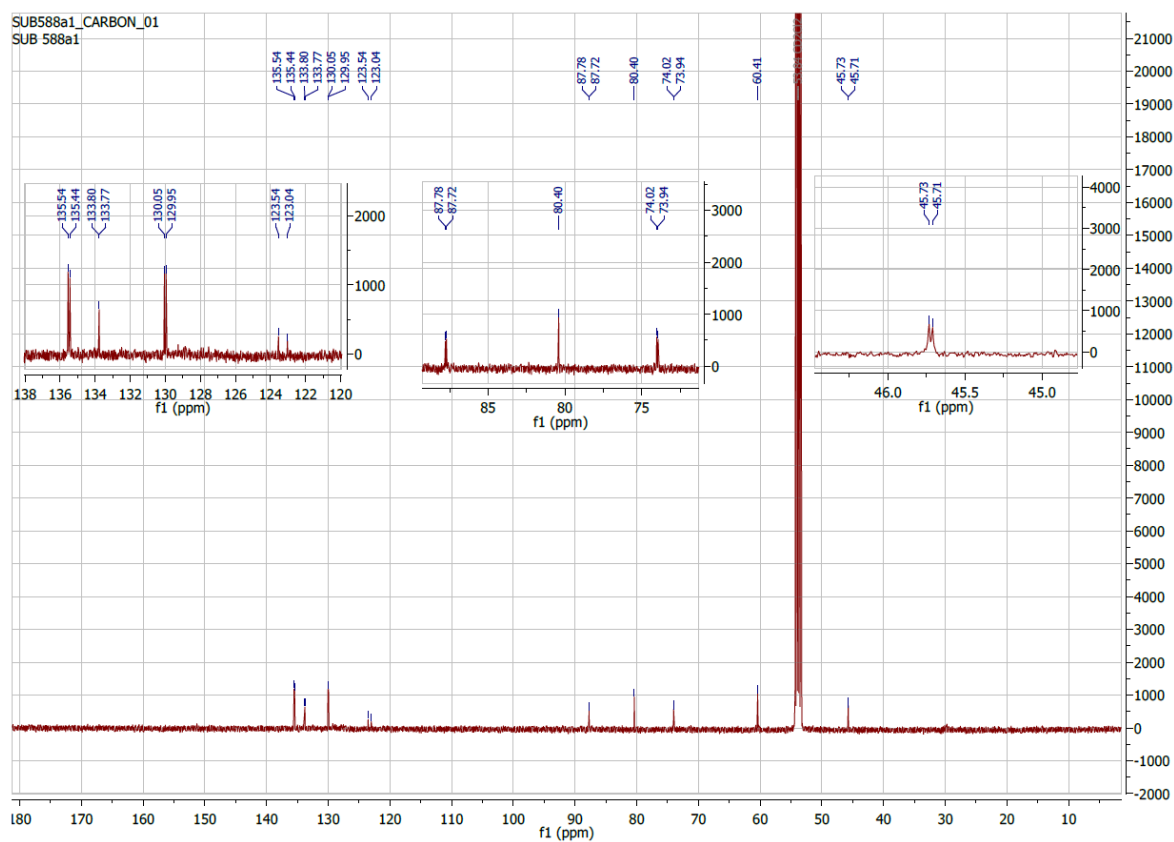

**Fig S32.** <sup>13</sup>C NMR of [Fc'(NMe<sub>2</sub>)(PPh<sub>2</sub>)·PdCl][SbF<sub>6</sub>]<sub>2</sub> (**11**), measured in CD<sub>2</sub>Cl<sub>2</sub>.

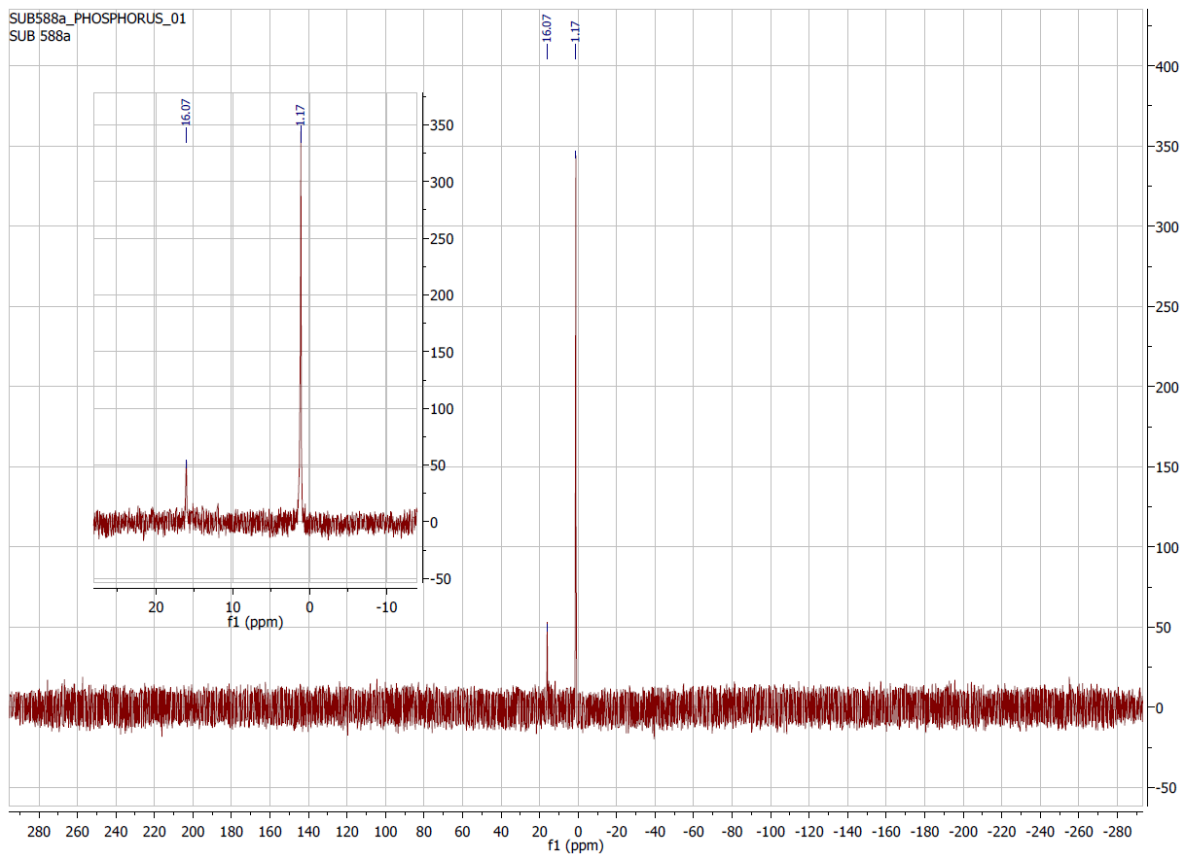

**Fig S33.**  $^{31}\text{P}\{^1\text{H}\}$  NMR of  $[\text{Fc}'(\text{NMe}_2)(\text{PPh}_2) \cdot \text{PdCl}][\text{SbF}_6]_2$  (**11**), measured in  $\text{CD}_2\text{Cl}_2$ .

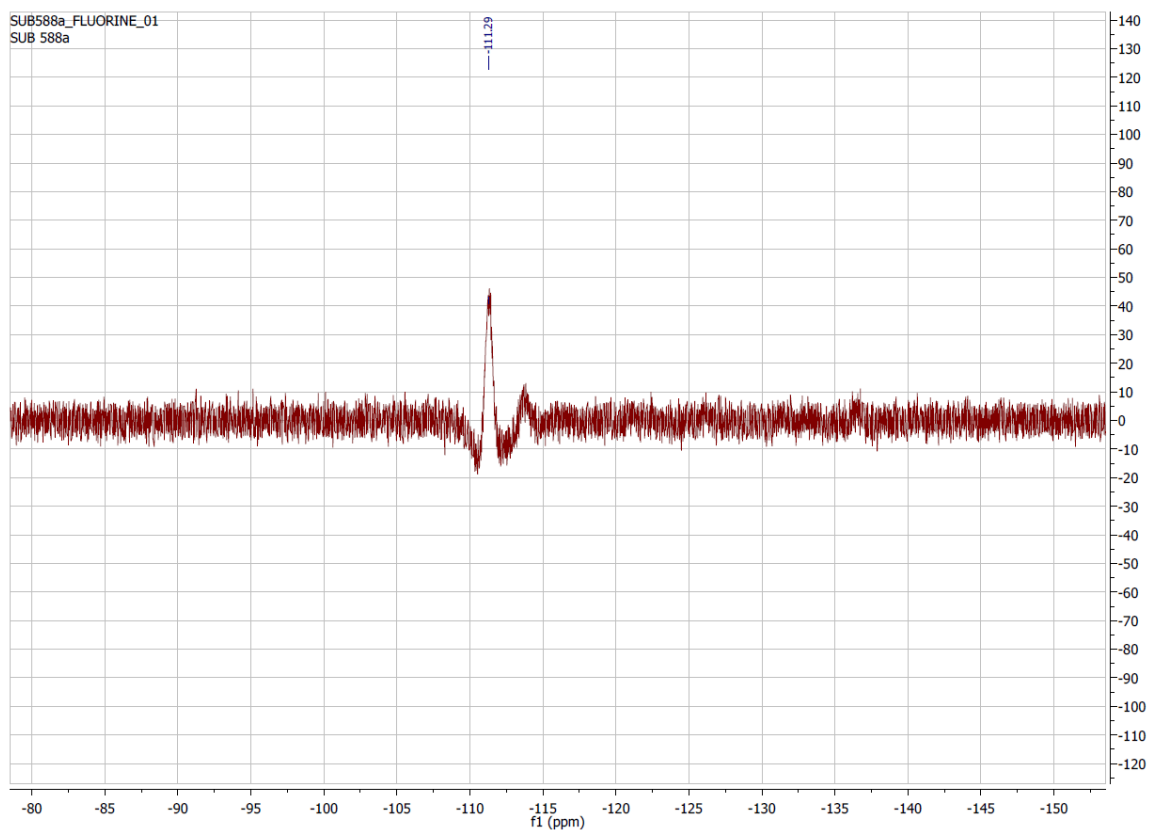

**Fig S34.**  $^{19}\text{F}$  NMR of  $[\text{Fc}'(\text{NMe}_2)(\text{PPh}_2) \cdot \text{PdCl}][\text{SbF}_6]_2$  (**11**), measured in  $\text{CD}_2\text{Cl}_2$ .



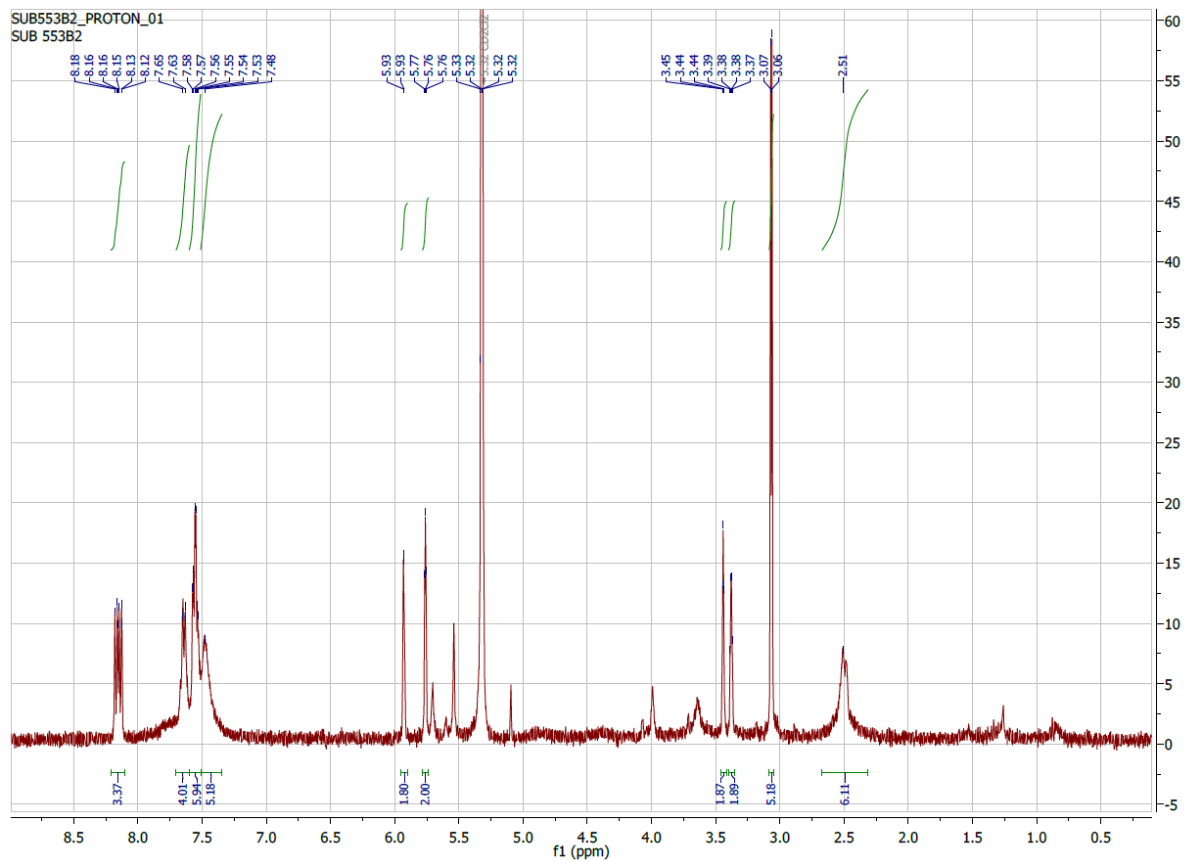

Fig S35.  $^1\text{H}$  NMR of  $[\text{Fc}'(\text{NMe}_2)(\text{PPh}_2)\cdot\text{PdPPh}_2(\text{C}_5\text{H}_5)][\text{SbF}_6]_2$  (**12**), measured in  $\text{CD}_2\text{Cl}_2$ .

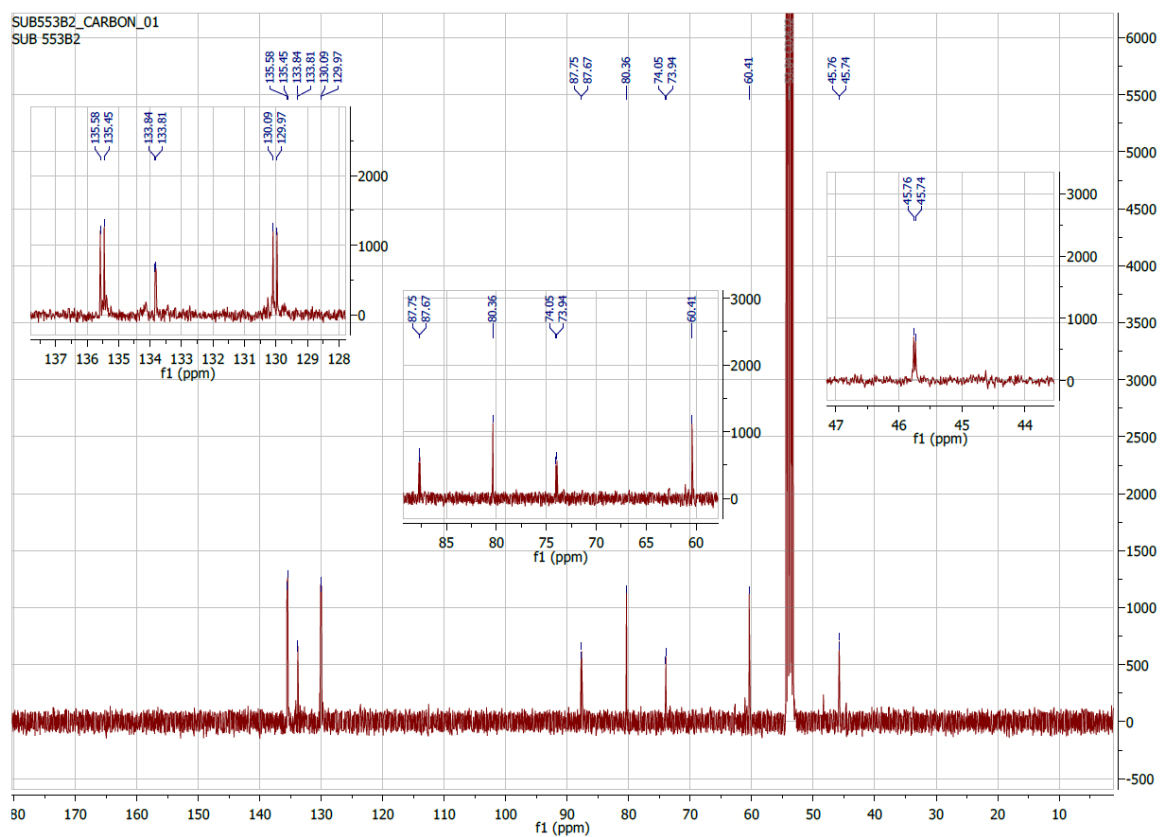

Fig S36.  $^{13}\text{C}$  NMR of  $[\text{Fc}'(\text{NMe}_2)(\text{PPh}_2)\cdot\text{PdPPh}_2(\text{C}_5\text{H}_5)][\text{SbF}_6]_2$  (**12**), measured in  $\text{CD}_2\text{Cl}_2$ .

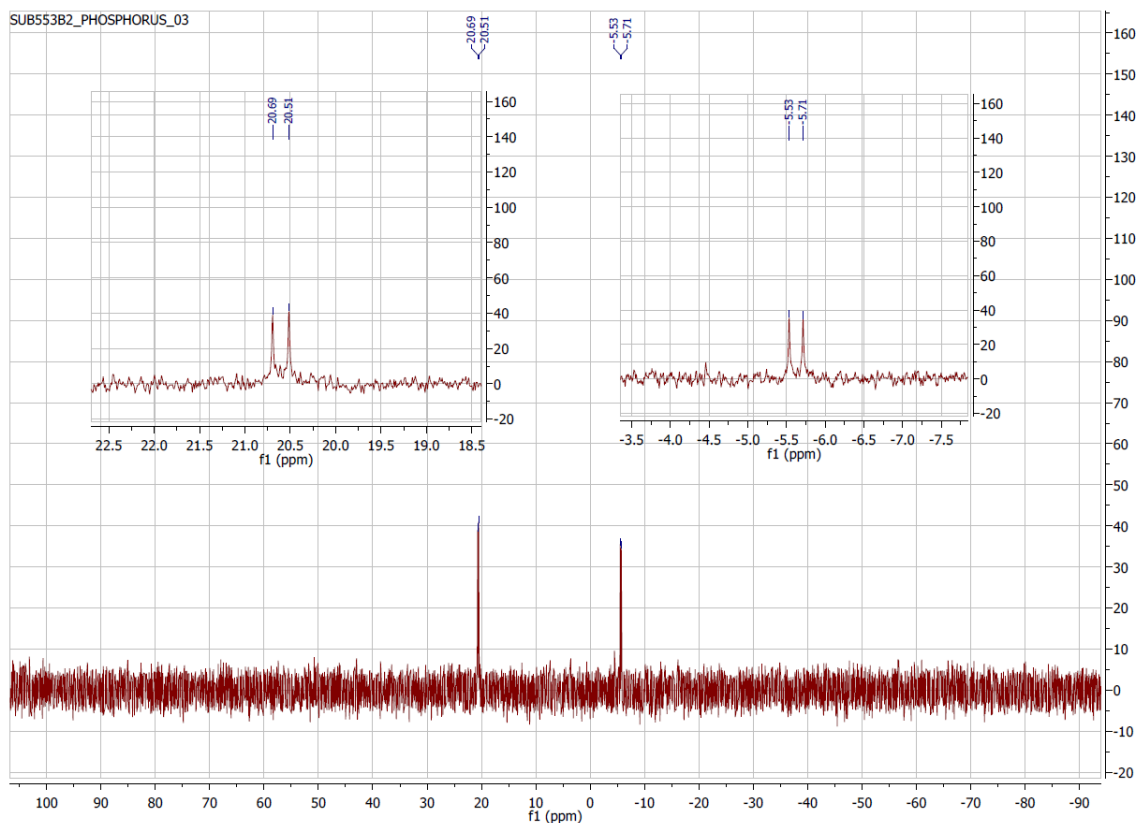

Fig S37.  $^{31}\text{P}\{^1\text{H}\}$  NMR of  $[\text{Fc}'(\text{NMe}_2)(\text{PPh}_2)\cdot\text{PdPPh}_2(\text{C}_5\text{H}_5)][\text{SbF}_6]_2$  (**12**), measured in  $\text{CD}_2\text{Cl}_2$ .

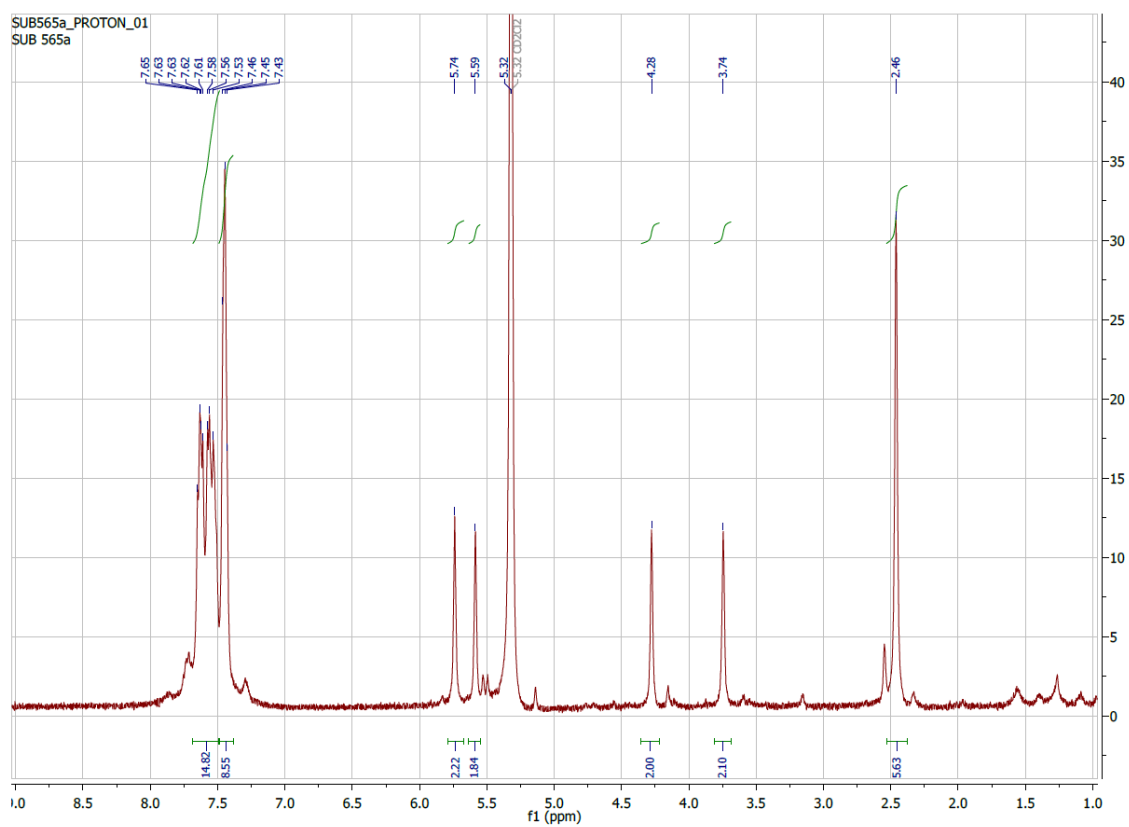

Fig S38.  $^1\text{H}$  NMR of  $[\text{Fc}'(\text{NMe}_2)(\text{PPh}_2)\cdot\text{PdPPh}_3][\text{BF}_4]_2$  (**13**), measured in  $\text{CD}_2\text{Cl}_2$ .

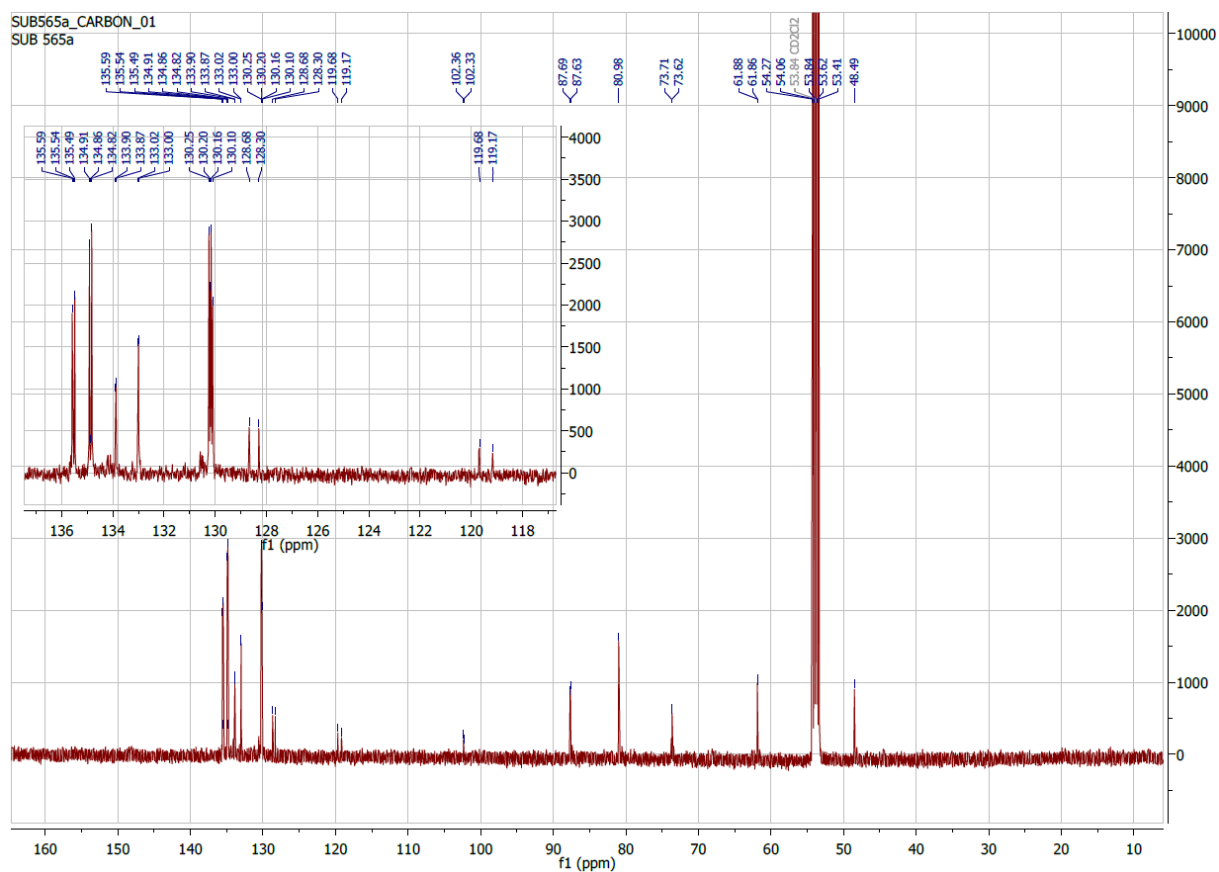

**Fig S39.**  $^{13}\text{C}$  NMR of  $[\text{Fc}'(\text{NMe}_2)(\text{PPh}_2)\cdot\text{PdPPh}_3][\text{BF}_4]_2$  (**13**), measured in  $\text{CD}_2\text{Cl}_2$ .

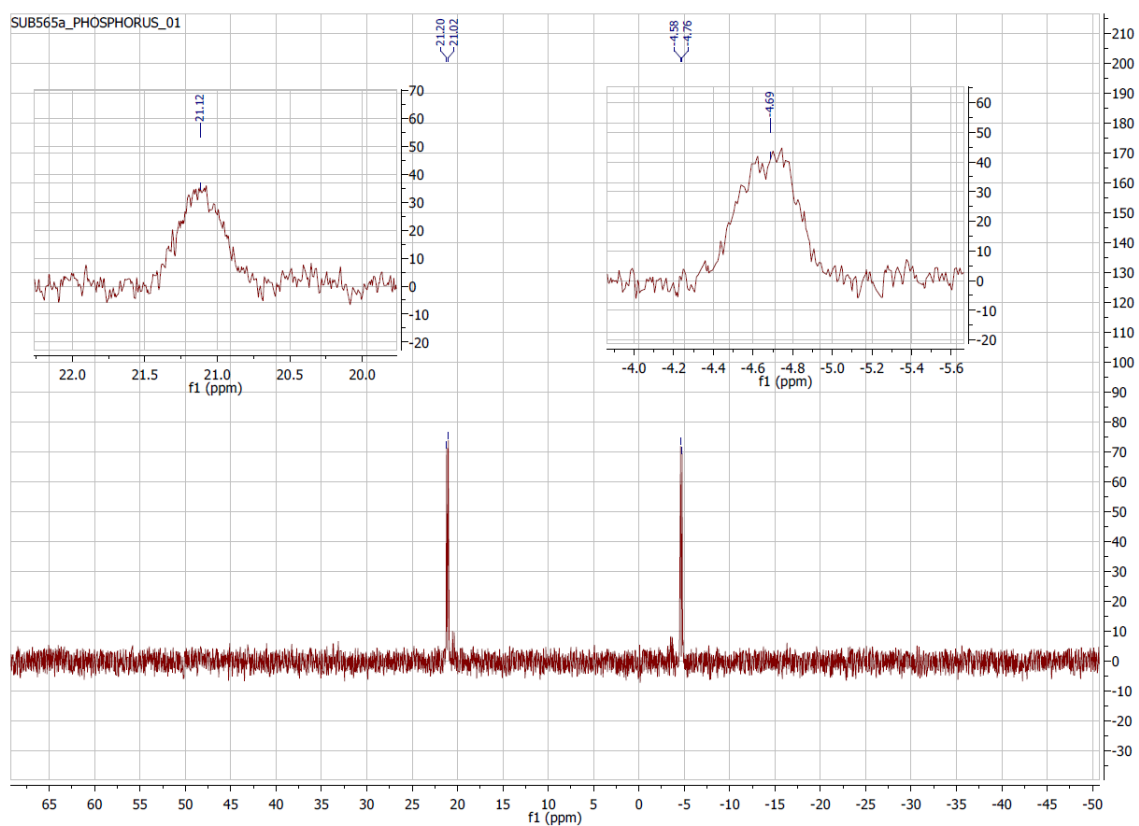

**Fig S40.**  $^{31}\text{P}\{^1\text{H}\}$  NMR of  $[\text{Fc}'(\text{NMe}_2)(\text{PPh}_2)\cdot\text{PdPPh}_3][\text{BF}_4]_2$  (**13**), measured in  $\text{CD}_2\text{Cl}_2$ . Corresponding peaks in  $^1\text{H}$  coupled  $^{31}\text{P}$  NMR are shown in insets.

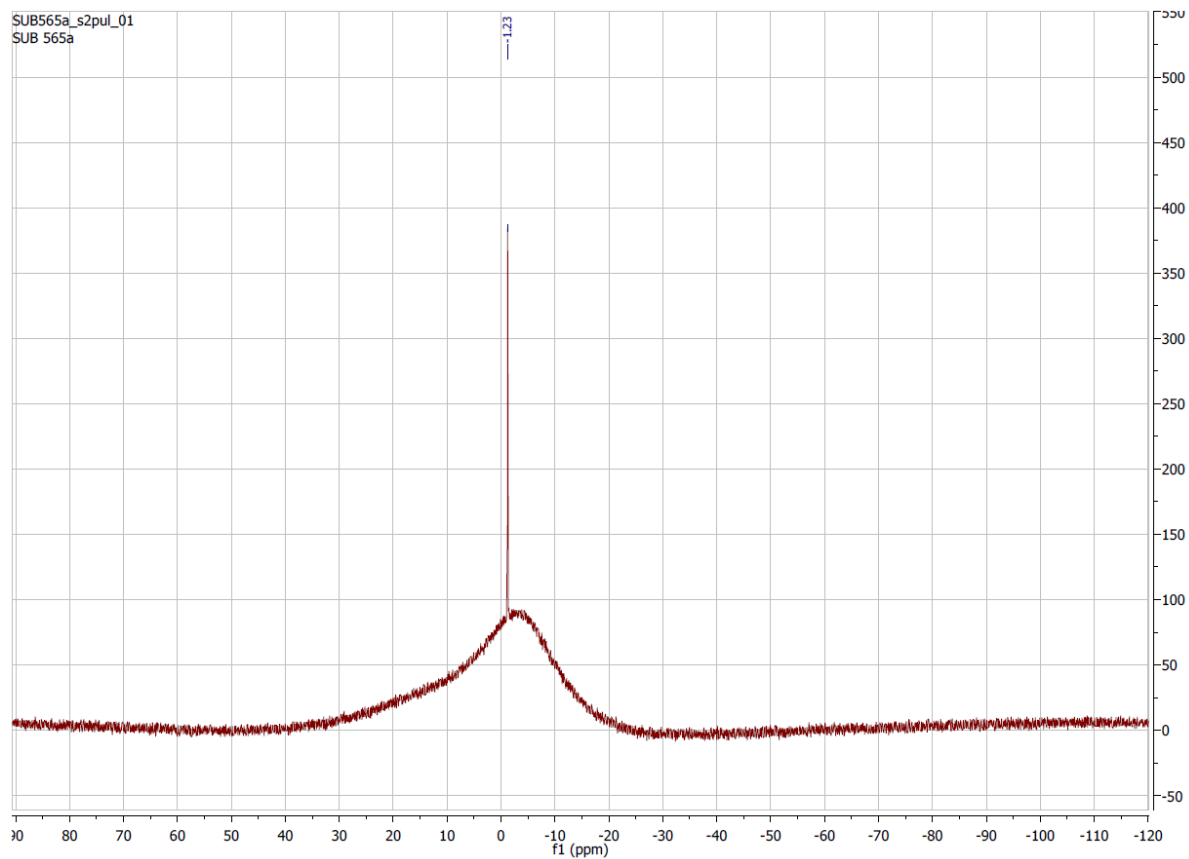

**Fig S41.**  $^{11}\text{B}$  NMR of  $[\text{Fc}'(\text{NMe}_2)(\text{PPh}_2)\cdot\text{PdPPh}_3][\text{BF}_4]_2$  (**13**), measured in  $\text{CD}_2\text{Cl}_2$ .

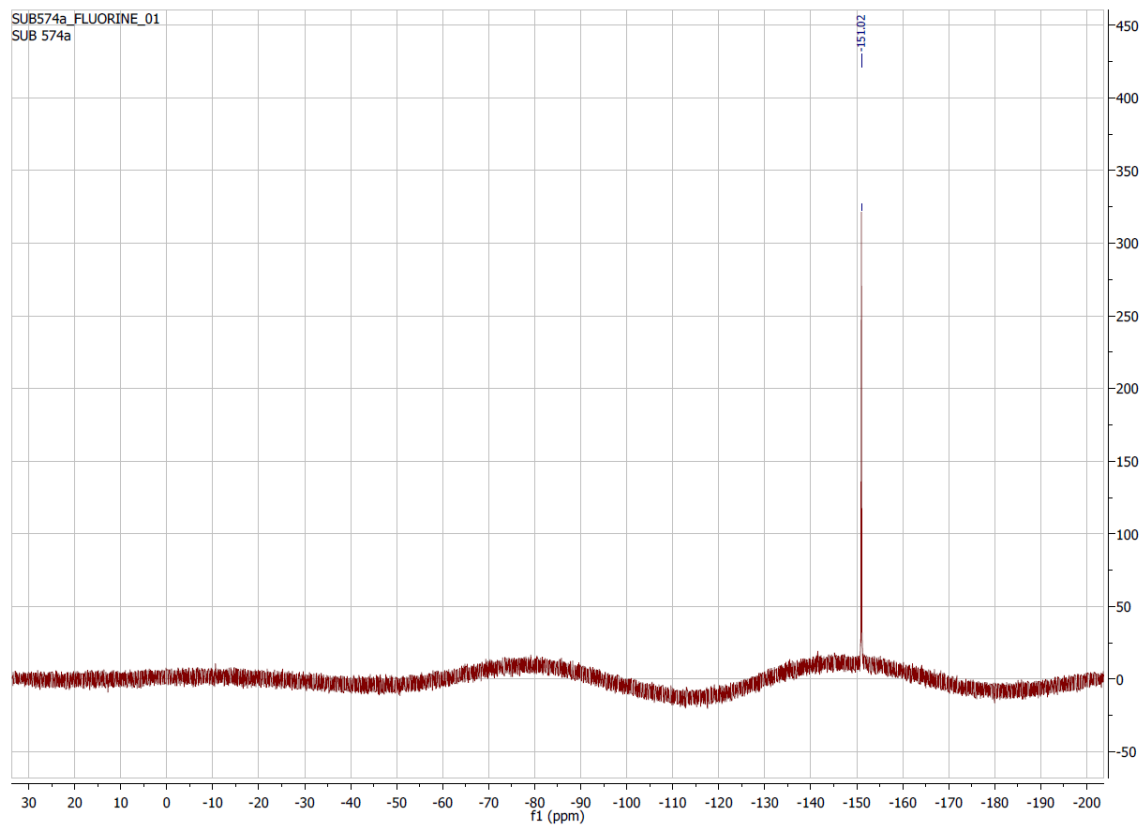

**Fig S42.**  $^{19}\text{F}$  NMR of  $[\text{Fc}'(\text{NMe}_2)(\text{PPh}_2)\cdot\text{PdPPh}_3][\text{BF}_4]_2$  (**13**), measured in  $\text{CD}_2\text{Cl}_2$ .

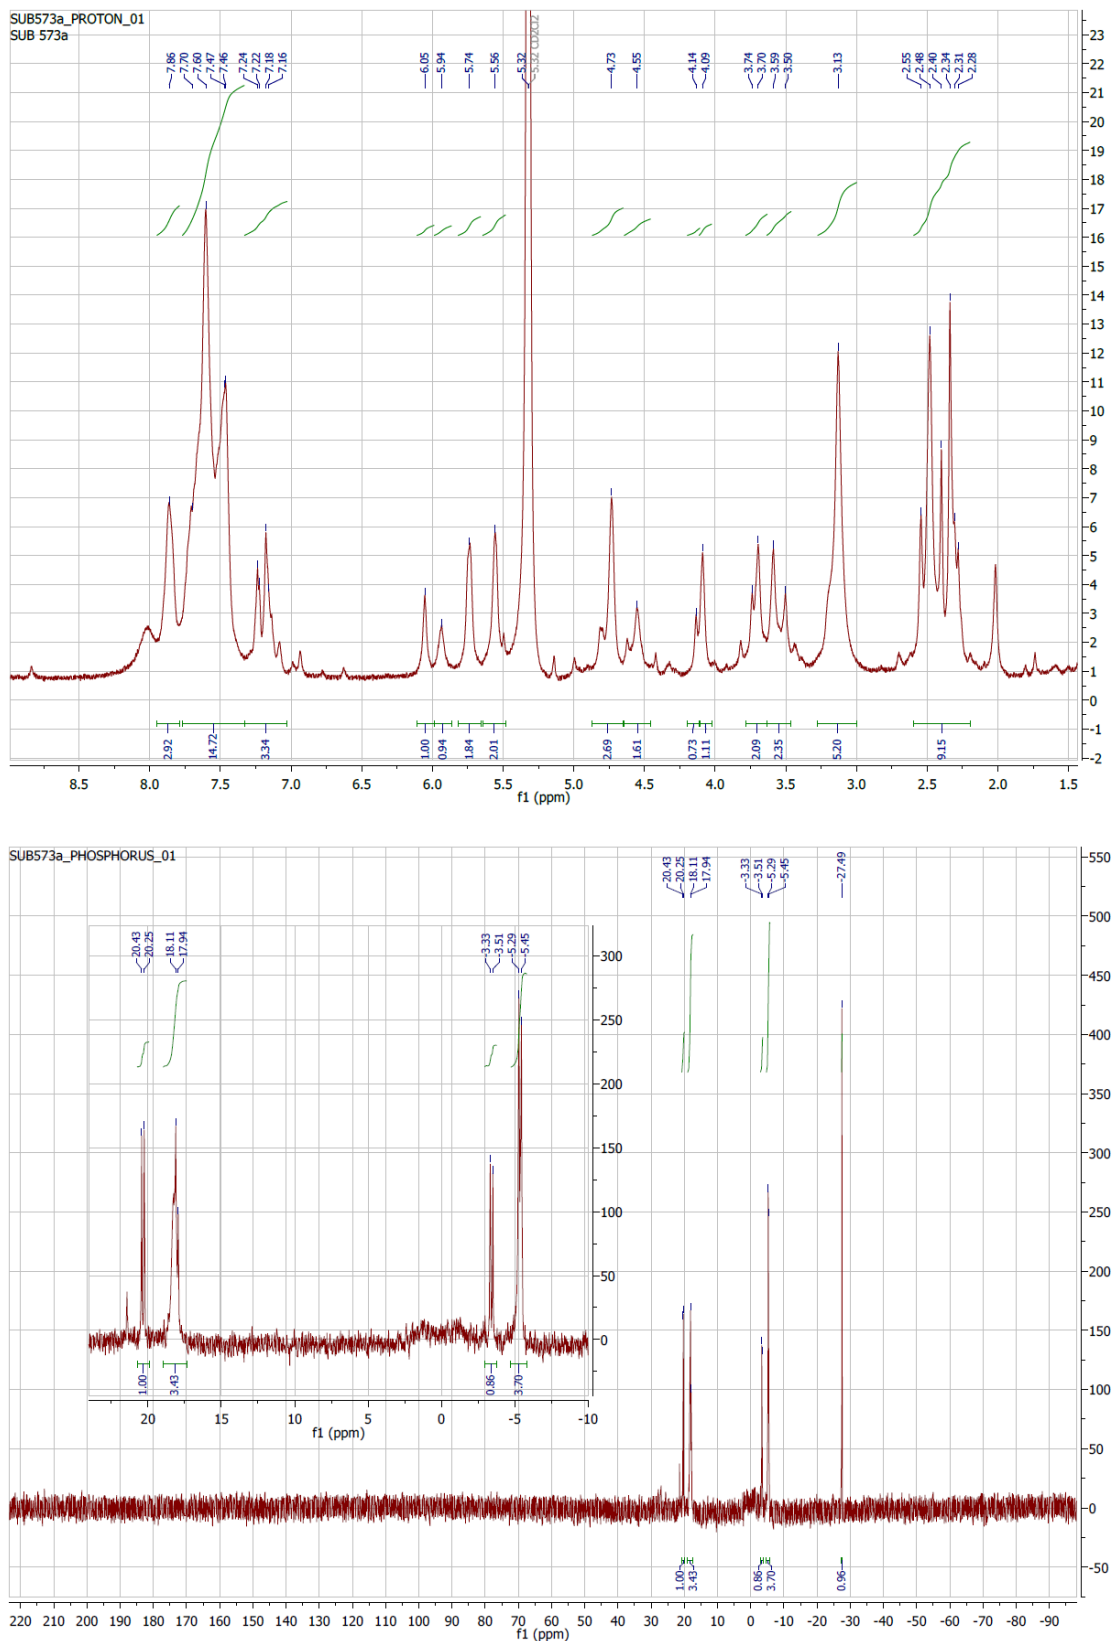

**Fig S43.**  $^1\text{H}$  and  $^{31}\text{P}$  NMR for failed synthesis of  $[\text{Fc}'(\text{NMe}_2)(\text{PPh}_2) \cdot \text{PdMe}_3][\text{BF}_4]_2$ , measured in  $\text{CD}_2\text{Cl}_2$ . The peak at  $\delta$  -27.49 ppm are resulting from  $\text{PMe}_3$ , which could not be removed after several washing with toluene and  $\text{Et}_2\text{O}$ . This reaction mixture contains multiple rotamers of  $[\text{Fc}'(\text{NMe}_2)(\text{PPh}_2) \cdot \text{Pd}(\text{PPh}_2)\text{Fc}'(\text{NMe}_2)][\text{BF}_4]_2$  (**14**) (ca. 74:26) as major products. HRMS (MALDI) of this species shows major peak at 769.0980 which corresponds to  $[\text{M}]$  for  $[\text{C}_{41}\text{H}_{39}\text{FeNP}_2\text{Pd}]^{2+}$  (or  $\text{Fc}'(\text{NMe}_2)(\text{PPh}_2) \cdot \text{Pd}(\text{PPh}_2\text{Cp})^{2+}$ ). Anal found: C, 50.09; H, 4.04; N, 2.50 (Anal. Calcd. for  $\text{C}_{48}\text{H}_{48}\text{B}_2\text{F}_8\text{Fe}_2\text{N}_2\text{P}_2\text{Pd}$ : C, 52.10; H, 4.37; N, 2.53).

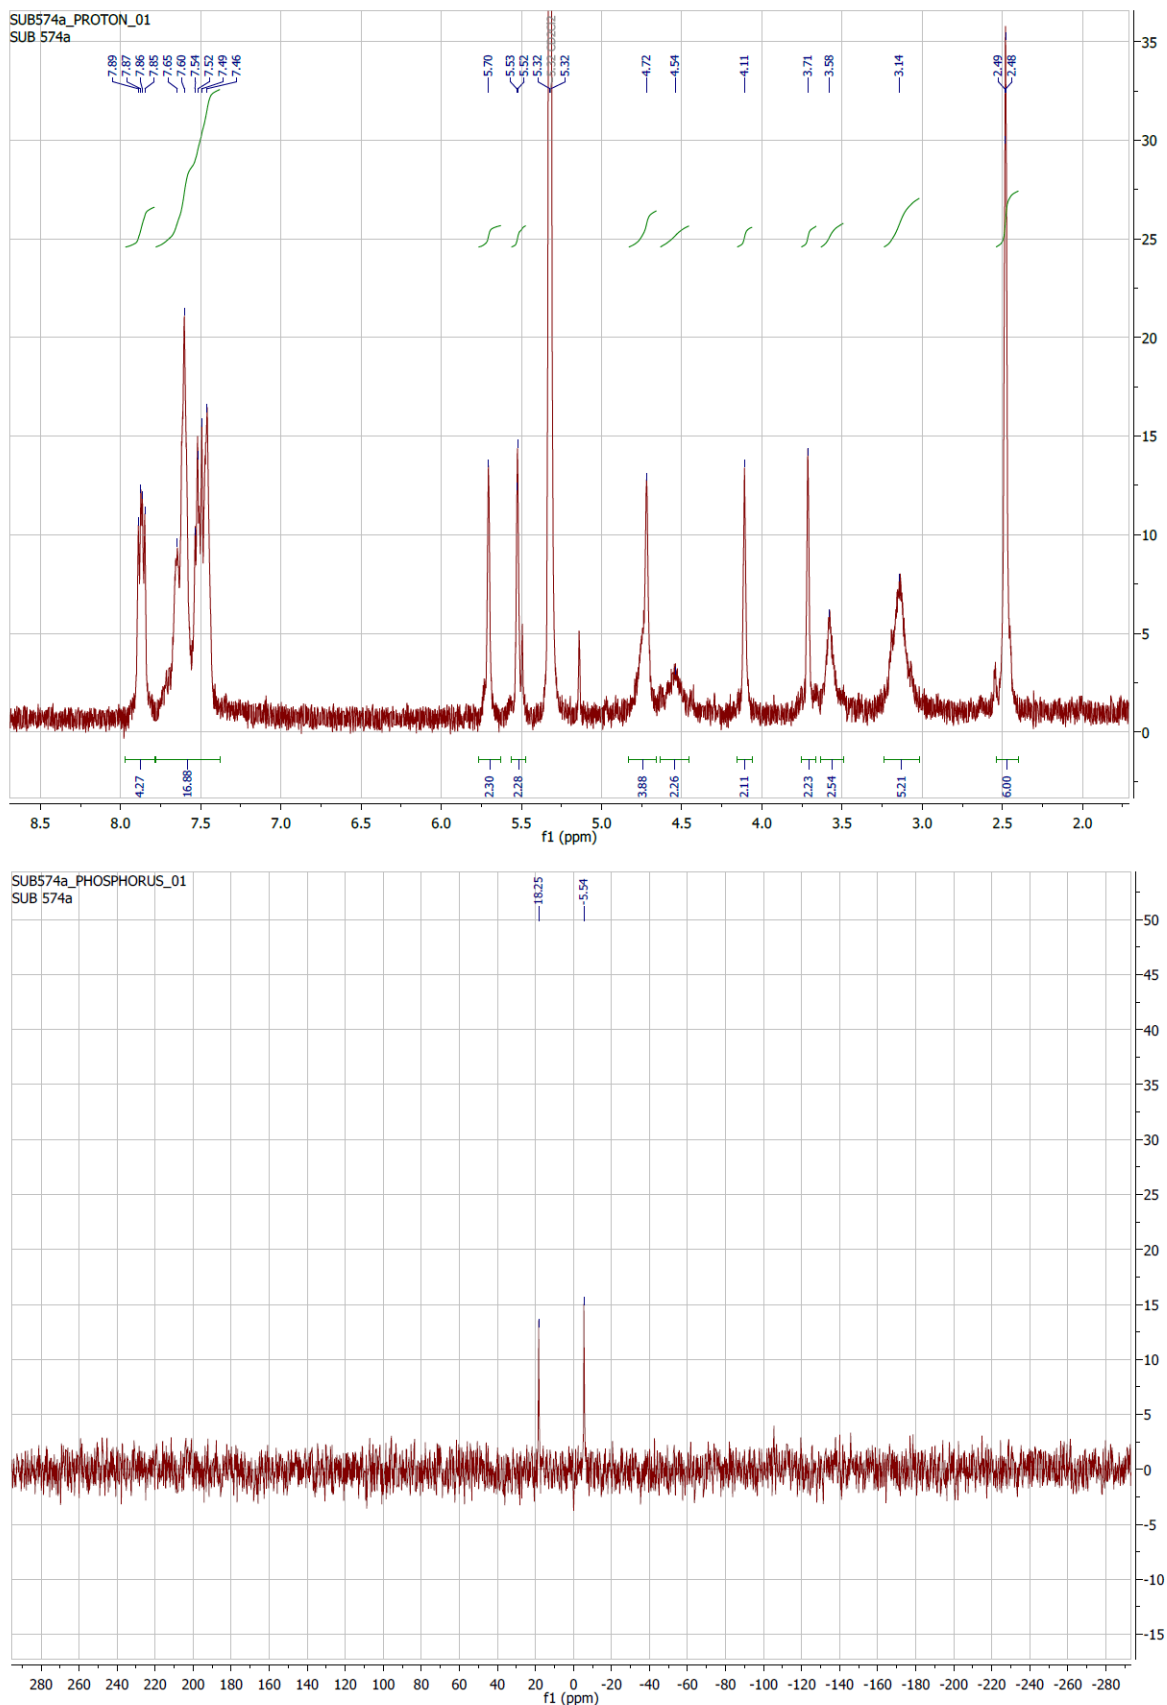

**Fig S44.**  $^1\text{H}$  and  $^{31}\text{P}\{^1\text{H}\}$  NMR for failed synthesis of  $[\text{Fc}'(\text{NMe}_2)(\text{PPh}_2)\cdot\text{Pd}(\text{o-Tol})_3][\text{BF}_4]_2$ , measured in  $\text{CD}_2\text{Cl}_2$ . This reaction mixture contains  $[\text{Fc}'(\text{NMe}_2)(\text{PPh}_2)\cdot\text{Pd}(\text{PPh}_2)\text{Fc}'(\text{NMe}_2)][\text{BF}_4]_2$  (**14**). HRMS (MALDI) of this species shows major peak at 769.0980, which corresponds to  $[\text{C}_{41}\text{H}_{39}\text{FeNP}_2\text{Pd}]^{2+}$  (or  $\text{Fc}'(\text{NMe}_2)(\text{PPh}_2)\cdot\text{Pd}(\text{PPh}_2\text{Cp})^{2+}$ ) and minor peak at 519.0080, which corresponds to  $[\text{C}_{24}\text{H}_{24}\text{FeNPPd}]^{2+}$  (or  $\text{Fc}'(\text{NMe}_2)(\text{PPh}_2)\cdot\text{Pd}^{2+}$ ). Anal found: C, 51.65; H, 4.44; N, 2.45 (Anal. Calcd. for  $\text{C}_{48}\text{H}_{48}\text{B}_2\text{F}_8\text{Fe}_2\text{N}_2\text{P}_2\text{Pd}$ : C, 52.10; H, 4.37; N, 2.53).

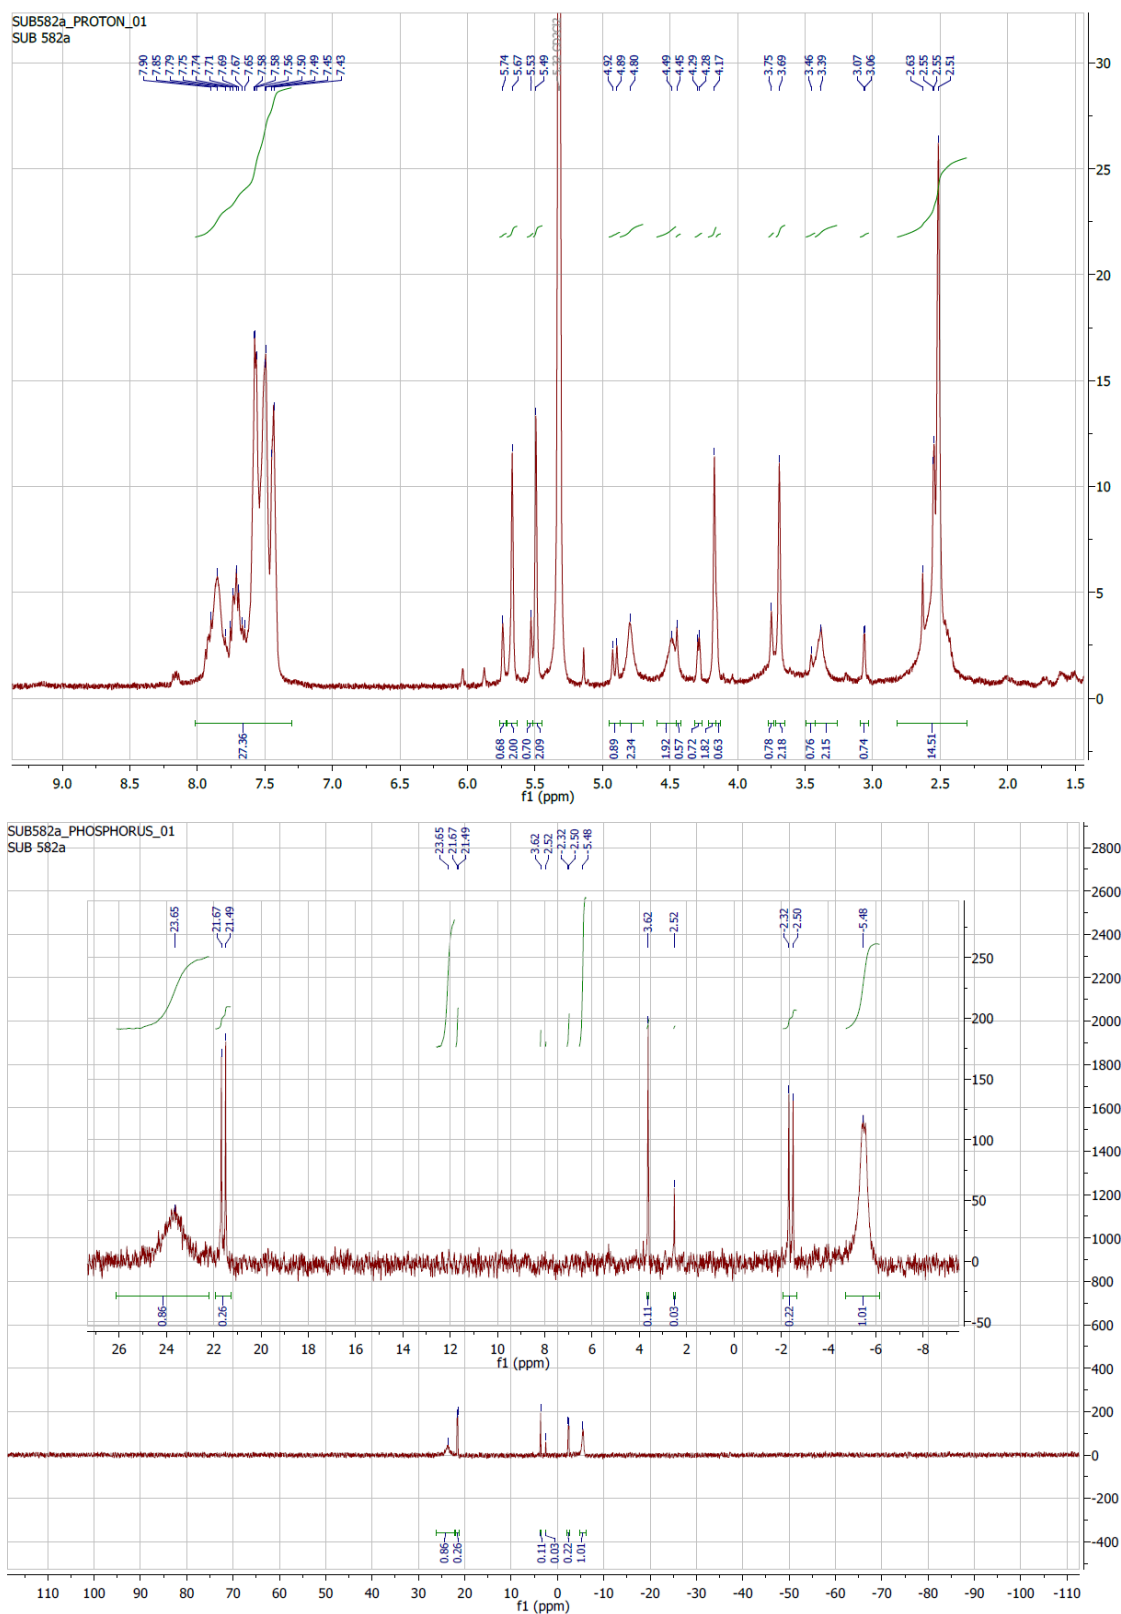

**Fig S45.**  $^1\text{H}$  and  $^{31}\text{P}$  NMR for selective synthesis of  $[\text{Fc}'(\text{NMe}_2)(\text{PPh}_2)\cdot\text{Pd}(\text{PPh}_2)\text{Fc}'(\text{NMe}_2)][\text{BF}_4]_2$  (**14**), measured in  $\text{CD}_2\text{Cl}_2$ .

This reaction mixture contains multiple rotamers of  $[\text{Fc}'(\text{NMe}_2)(\text{PPh}_2)\cdot\text{Pd}(\text{PPh}_2)\text{Fc}'(\text{NMe}_2)][\text{BF}_4]_2$  (**14**) (ca. 74:26) as major products. HRMS (MALDI) of this species shows major peak at 769.0980, which corresponds to  $[\text{C}_{41}\text{H}_{39}\text{FeNP}_2\text{Pd}]^{2+}$  (or  $\text{Fc}'(\text{NMe}_2)(\text{PPh}_2)\cdot\text{Pd}(\text{PPh}_2\text{Cp})^{2+}$ ) and minor peak at 932.0970, which corresponds to  $[\text{C}_{24}\text{H}_{24}\text{FeNPPd}]^{2+}$  (or  $\text{Fc}'(\text{NMe}_2)(\text{PPh}_2)\cdot\text{Pd}(\text{PPh}_2)\text{Fc}'(\text{NMe}_2)^{2+}$ ). Anal found: C, 50.88; H, 4.62; N, 2.45 (Anal. Calcd. for  $\text{C}_{48}\text{H}_{48}\text{B}_2\text{F}_8\text{Fe}_2\text{N}_2\text{P}_2\text{Pd}$ : C, 52.10; H, 4.37; N, 2.53).

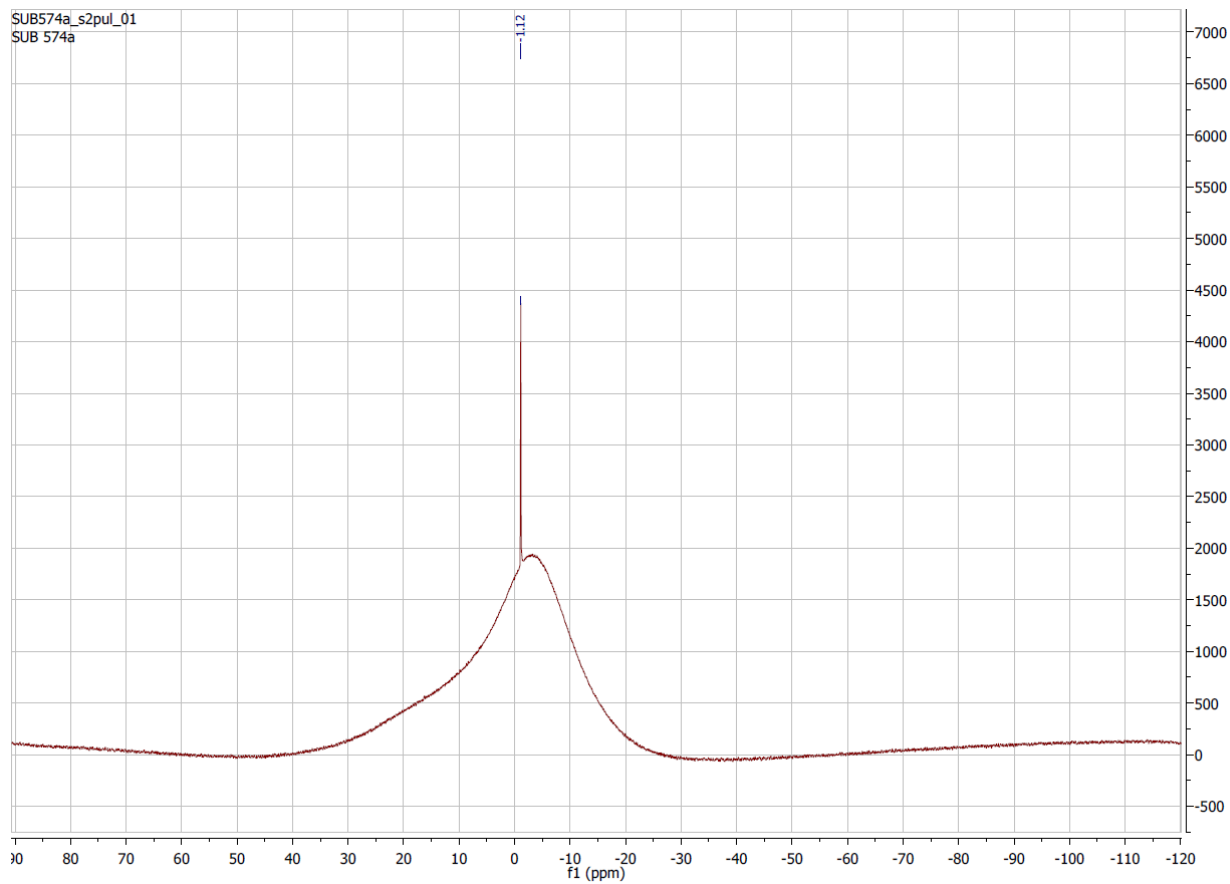

**Fig S46.**  $^{11}\text{B}$  NMR of  $[\text{Fc}'(\text{NMe}_2)(\text{PPh}_2)\cdot\text{Pd}(\text{PPh}_2)\text{Fc}'(\text{NMe}_2)][\text{BF}_4]_2$  (**14**), measured in  $\text{CD}_2\text{Cl}_2$ .

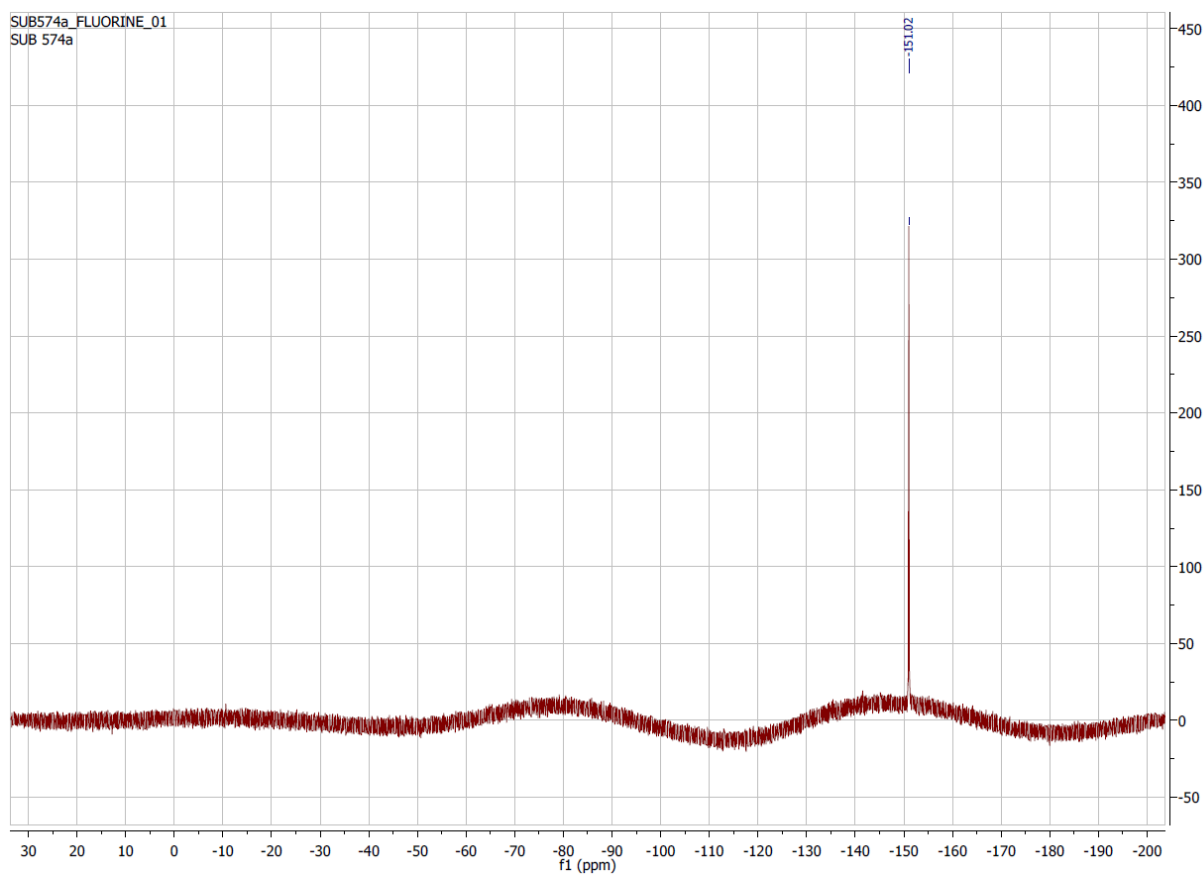

**Fig S47.**  $^{19}\text{F}$  NMR of  $[\text{Fc}'(\text{NMe}_2)(\text{PPh}_2)\cdot\text{Pd}(\text{PPh}_2)\text{Fc}'(\text{NMe}_2)][\text{BF}_4]_2$  (**14**), measured in  $\text{CD}_2\text{Cl}_2$ .



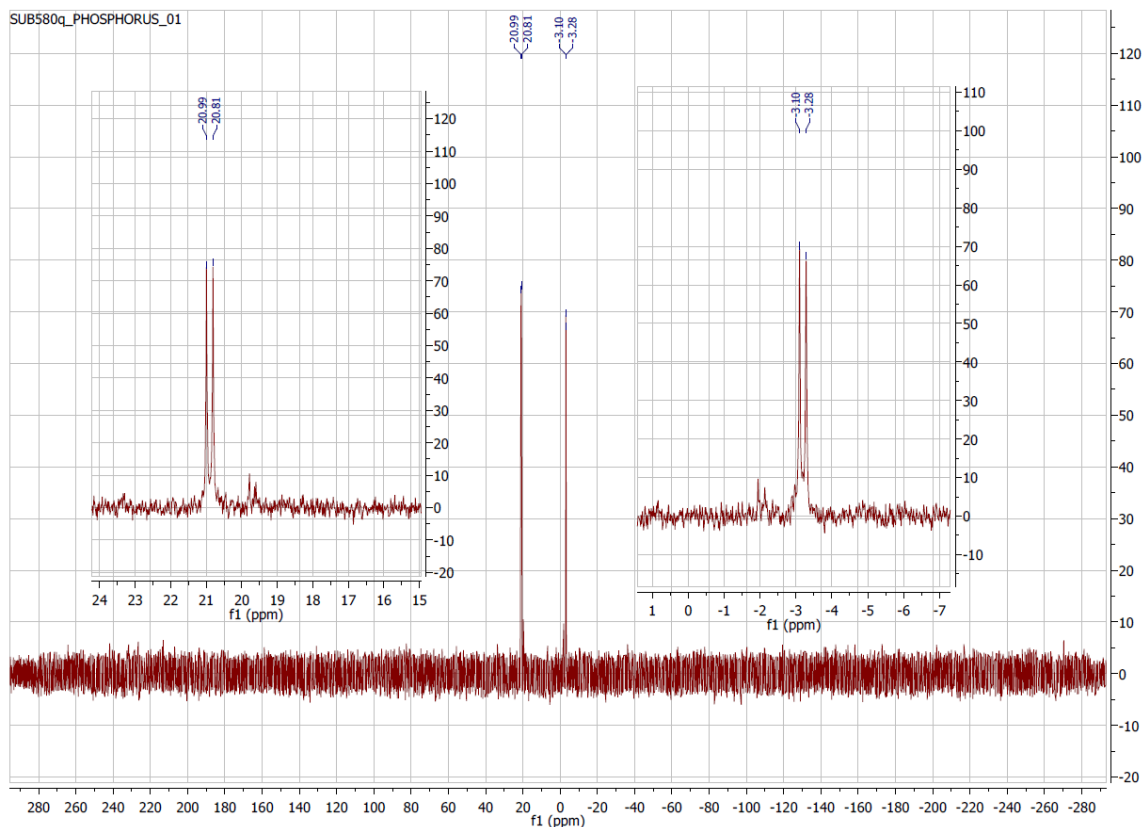

**Fig S48.**  $^{31}\text{P}\{^1\text{H}\}$  NMR of the reaction mixture of **13** and  $\text{P}(p\text{-OMe-C}_6\text{H}_4)_3$ , measured after 5 mins at RT in non-deuterated Acetone.

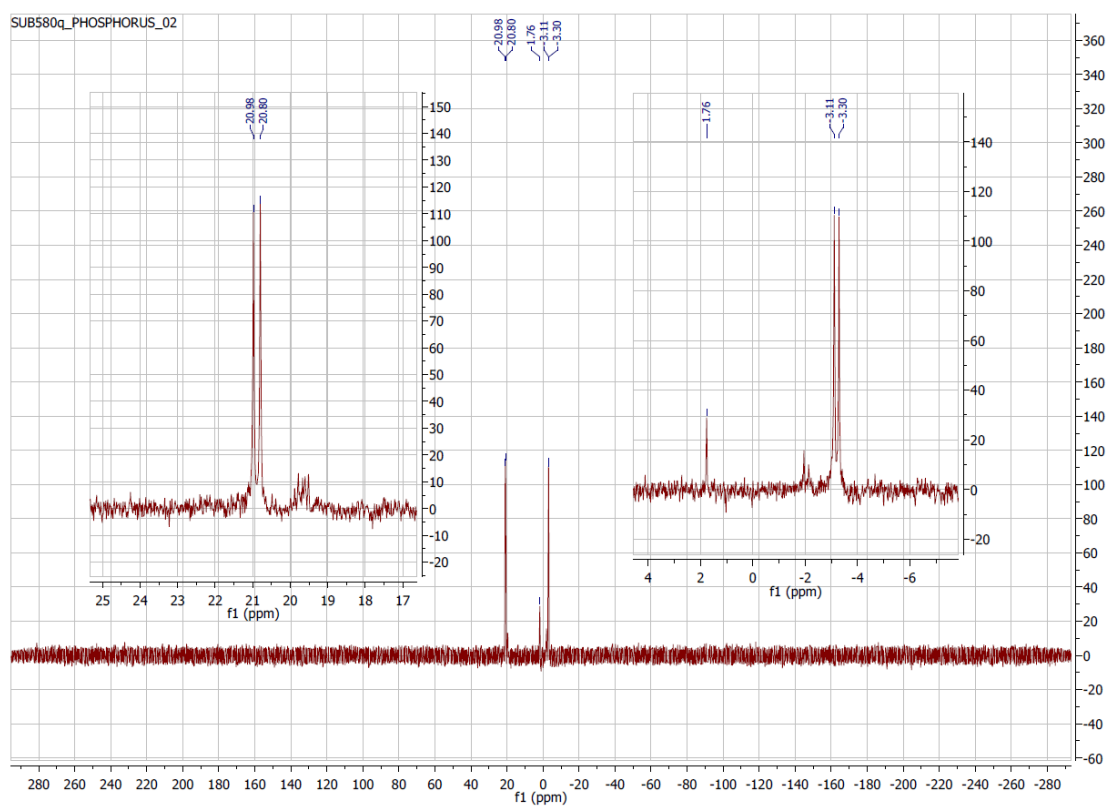

**Fig S49.**  $^{31}\text{P}\{^1\text{H}\}$  NMR of the reaction mixture of **13** and  $\text{P}(p\text{-OMe-C}_6\text{H}_4)_3$ , measured after 1 hr at 50 °C in non-deuterated Acetone.

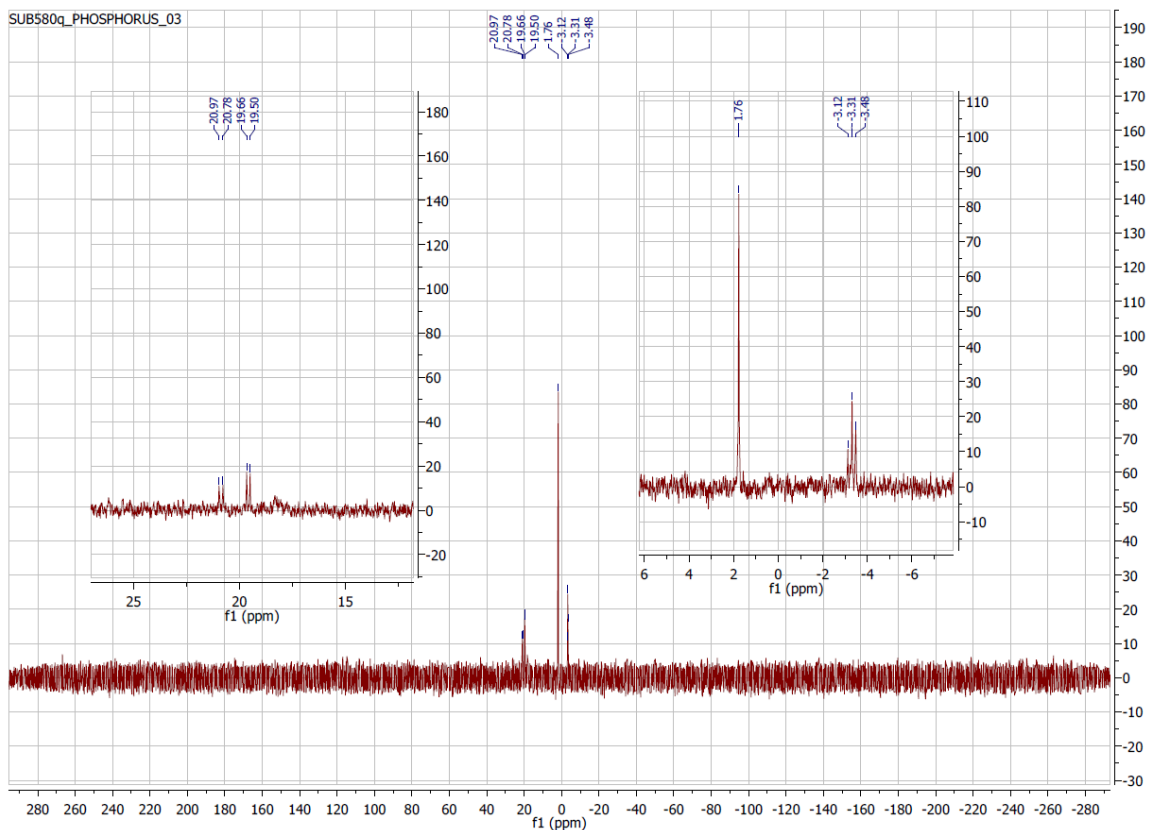

**Fig S50.**  $^{31}\text{P}\{^1\text{H}\}$  NMR of the reaction mixture of **13** and  $\text{P}(p\text{-OMe-C}_6\text{H}_4)_3$ , measured after 15 hrs at 50 °C in non-deuterated Acetone.

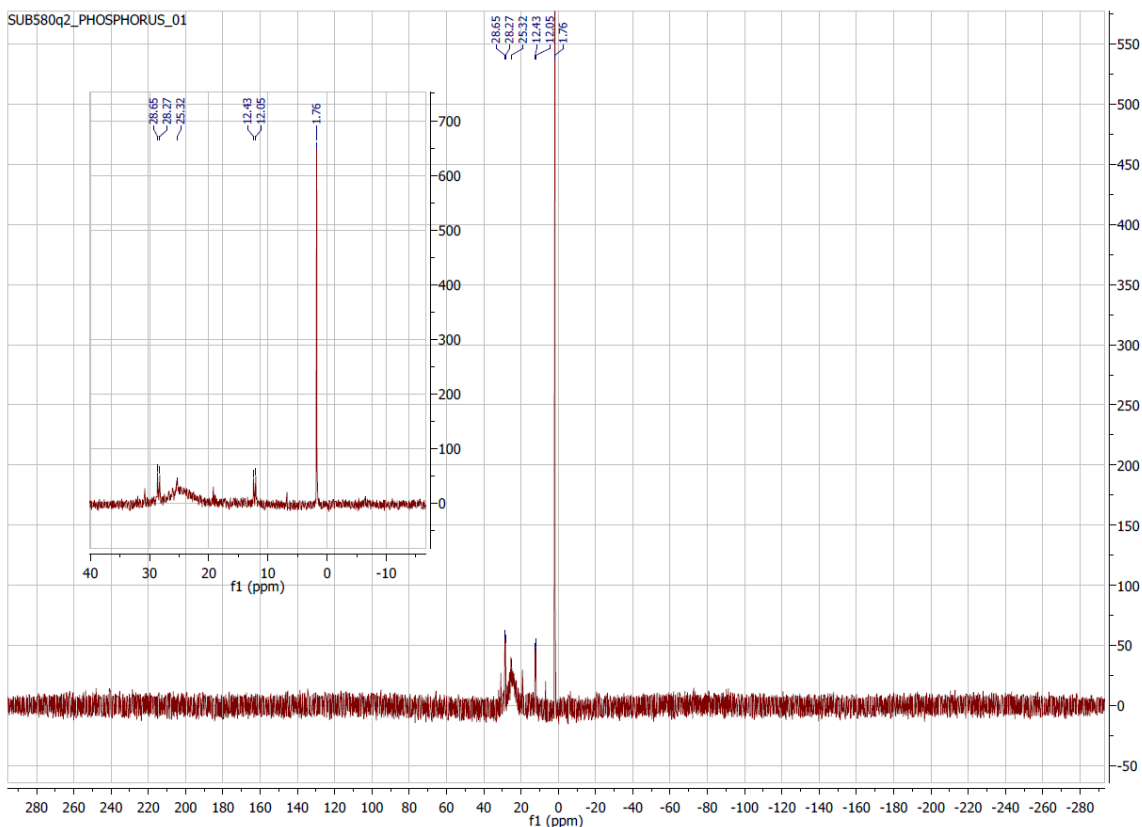

**Fig S51.**  $^{31}\text{P}\{^1\text{H}\}$  NMR of the reaction mixture of **13** and  $\text{P}(p\text{-OMe-C}_6\text{H}_4)_3$ , measured after 39 hrs at 50 °C in non-deuterated Acetone.

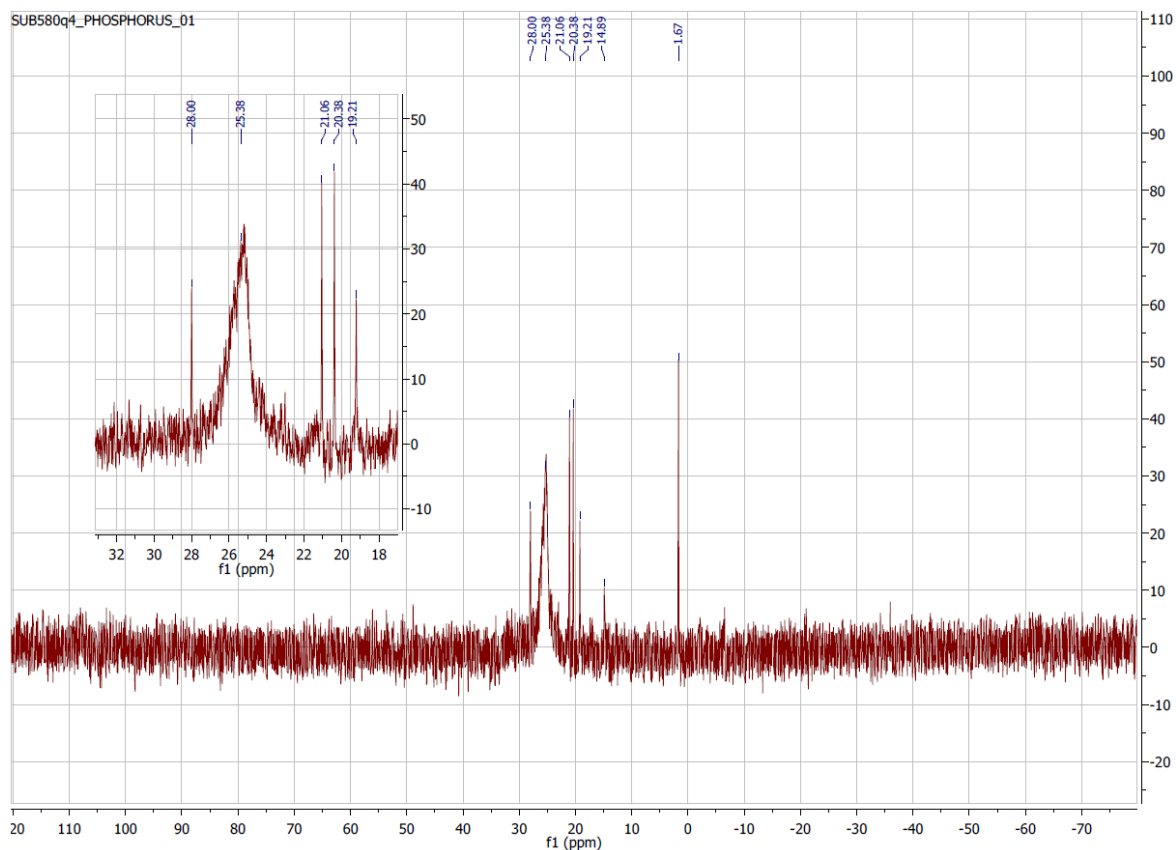

**Fig S52.**  $^{31}\text{P}\{^1\text{H}\}$  NMR of the reaction mixture of **13** and  $\text{P}(p\text{-OMe-C}_6\text{H}_4)_3$ , measured after 50 hrs at  $50^\circ\text{C}$  in non-deuterated Acetone.

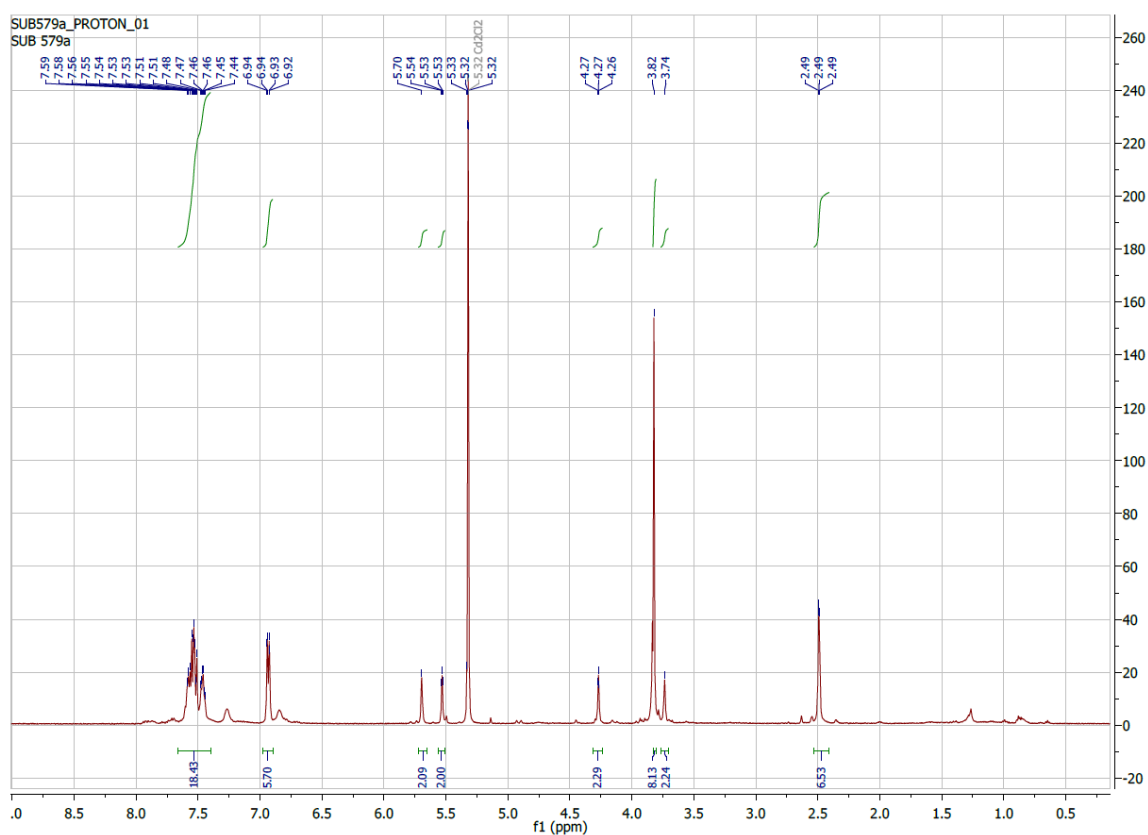

**Fig S53.**  $^1\text{H}$  NMR of  $[\text{Fc}'(\text{NMe}_2)(\text{PPh}_2)]\text{Pd}[\text{P}(p\text{-OMe-C}_6\text{H}_4)_3][\text{BF}_4]_2$  (**15**), measured in  $\text{CD}_2\text{Cl}_2$ .

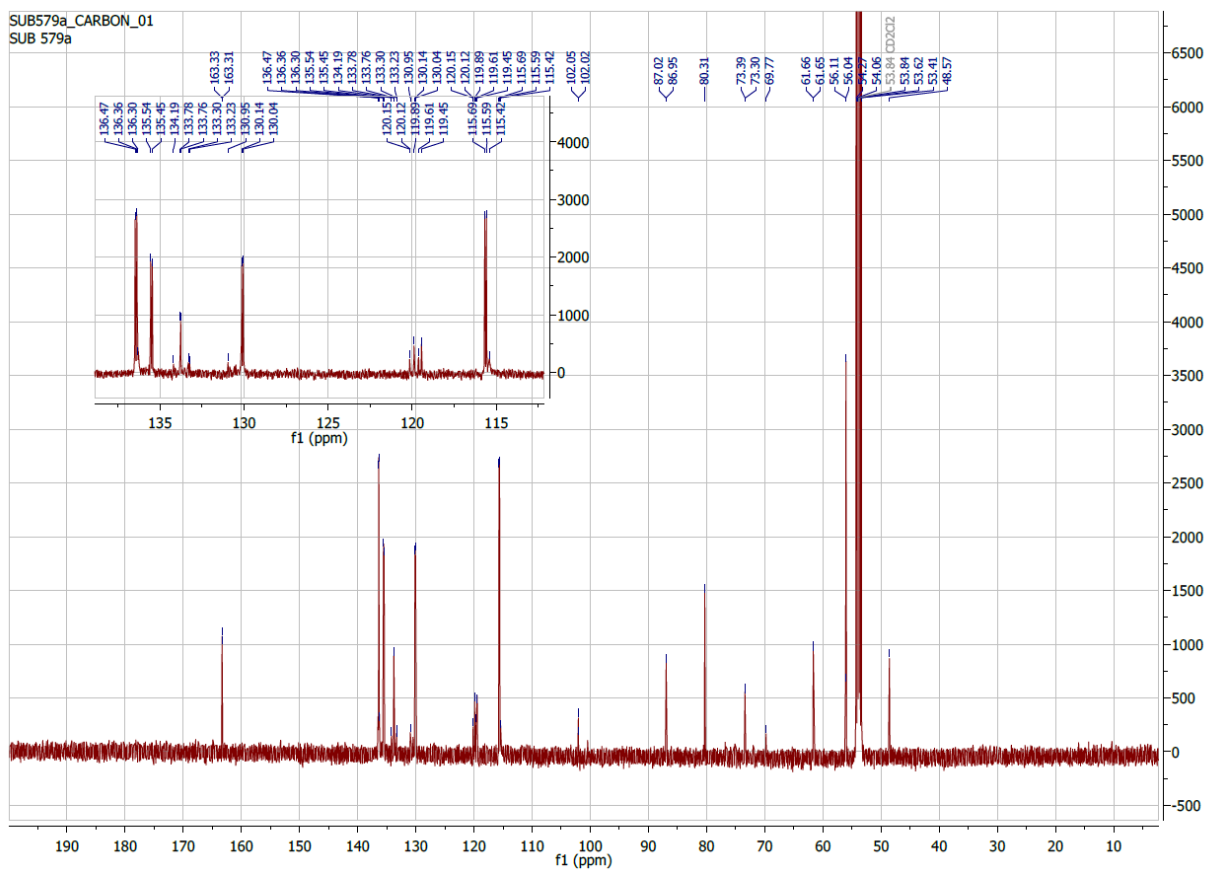

Fig S54.  $^{13}\text{C}$  NMR of  $[\text{Fc}'(\text{NMe}_2)(\text{PPh}_2)]\text{Pd}[\text{P}(p\text{-OMe-C}_6\text{H}_4)_3][\text{BF}_4]_2$  (**15**), measured in  $\text{CD}_2\text{Cl}_2$ .

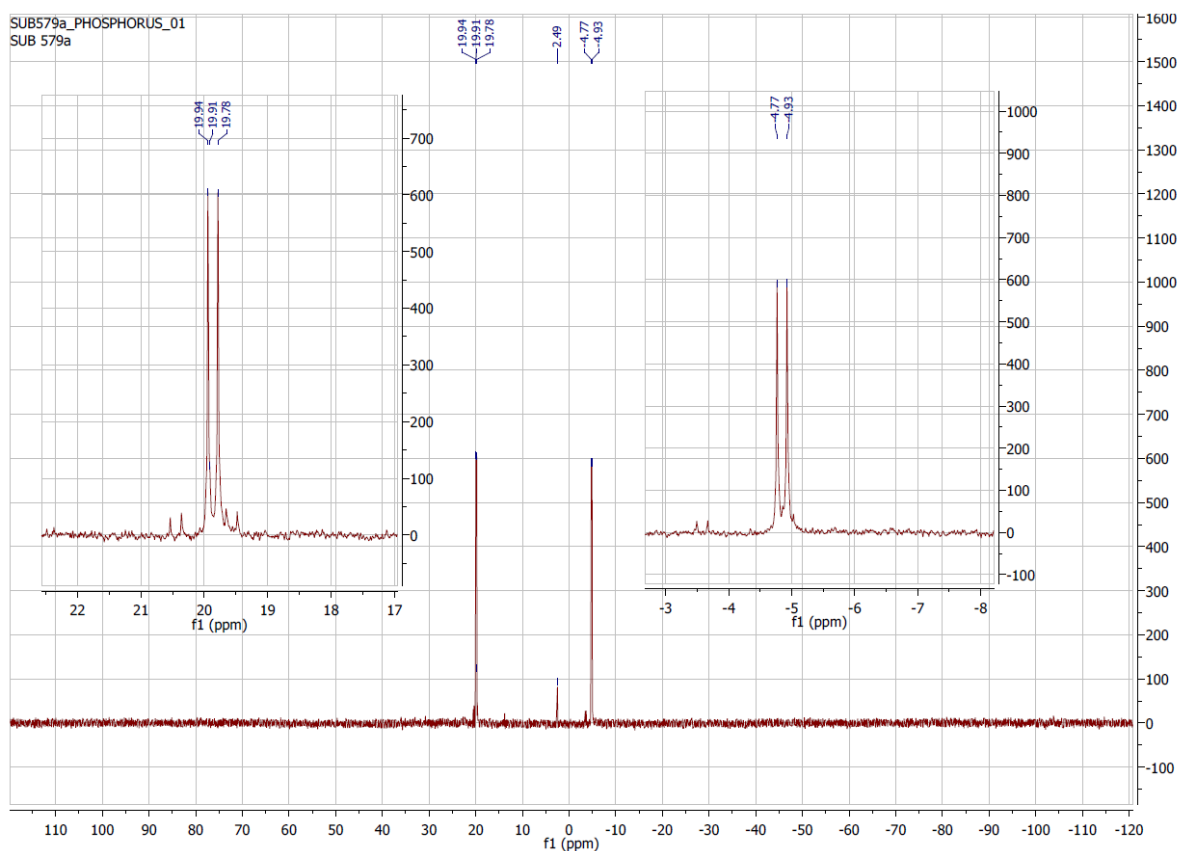

Fig S55.  $^{31}\text{P}\{^1\text{H}\}$  NMR of  $[\text{Fc}'(\text{NMe}_2)(\text{PPh}_2)]\text{Pd}[\text{P}(p\text{-OMe-C}_6\text{H}_4)_3][\text{BF}_4]_2$  (**15**), measured in  $\text{CD}_2\text{Cl}_2$ .

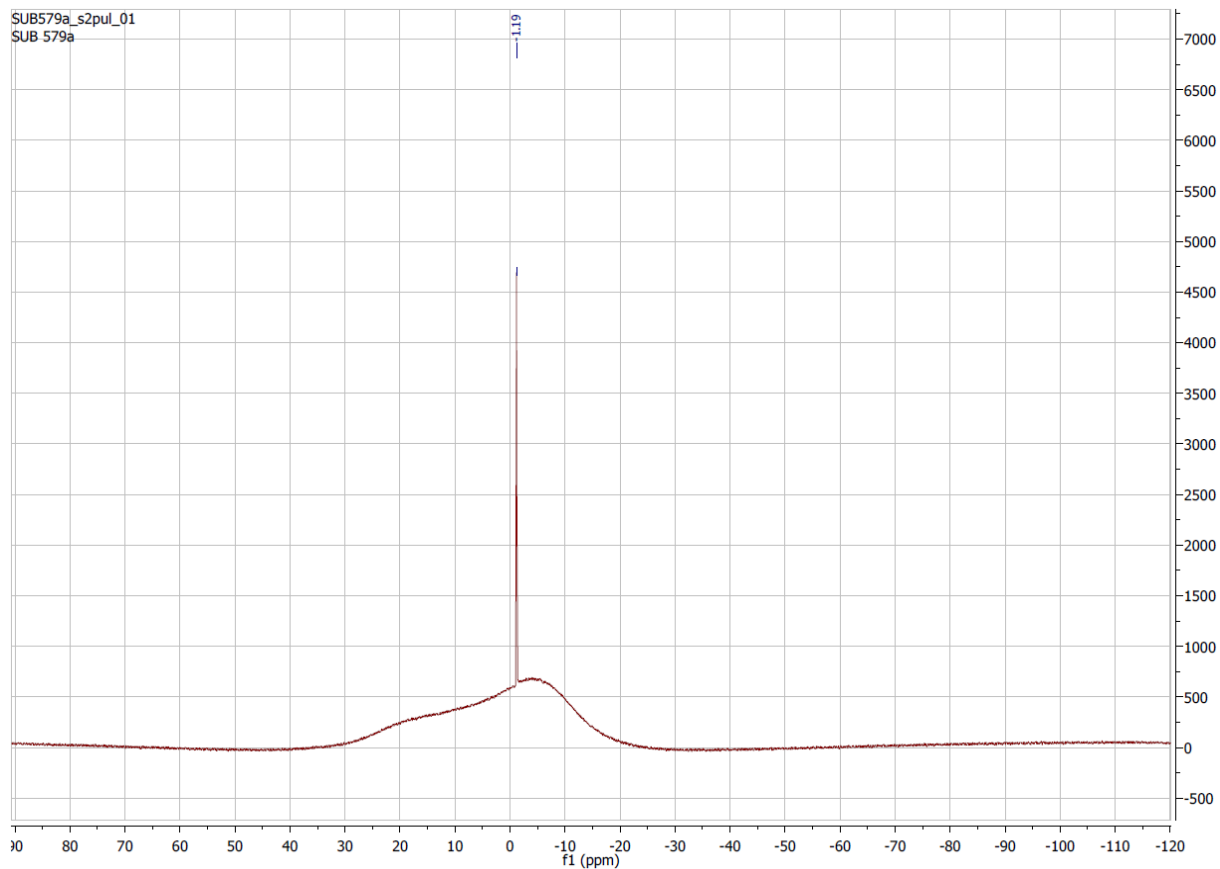

**Fig S56.** <sup>11</sup>B NMR of [Fc'(NMe<sub>2</sub>)(PPh<sub>2</sub>)]Pd[P(*p*-OMe-C<sub>6</sub>H<sub>4</sub>)<sub>3</sub>][BF<sub>4</sub>]<sub>2</sub> (**15**), measured in CD<sub>2</sub>Cl<sub>2</sub>.

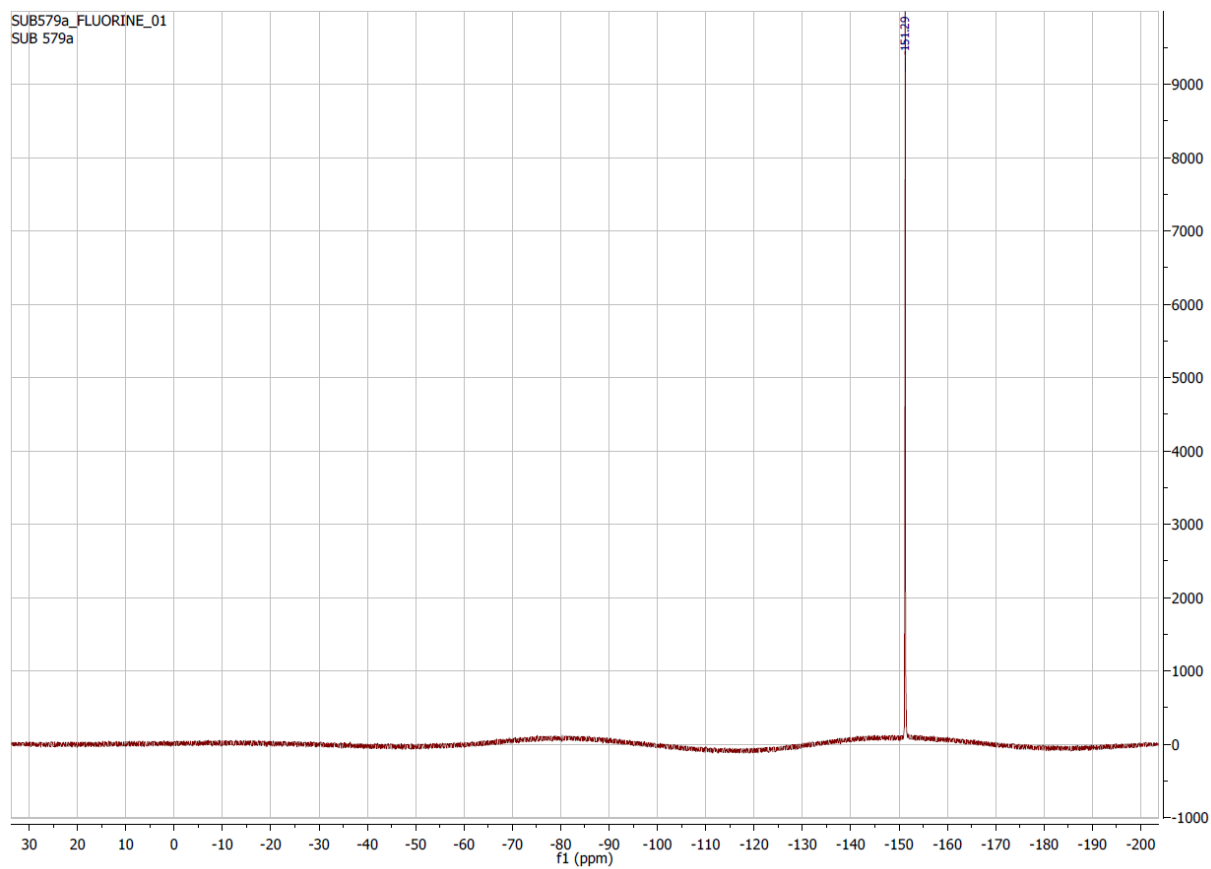

**Fig S57.** <sup>19</sup>F NMR of [Fc'(NMe<sub>2</sub>)(PPh<sub>2</sub>)]Pd[P(*p*-OMe-C<sub>6</sub>H<sub>4</sub>)<sub>3</sub>][BF<sub>4</sub>]<sub>2</sub> (**15**), measured in CD<sub>2</sub>Cl<sub>2</sub>.

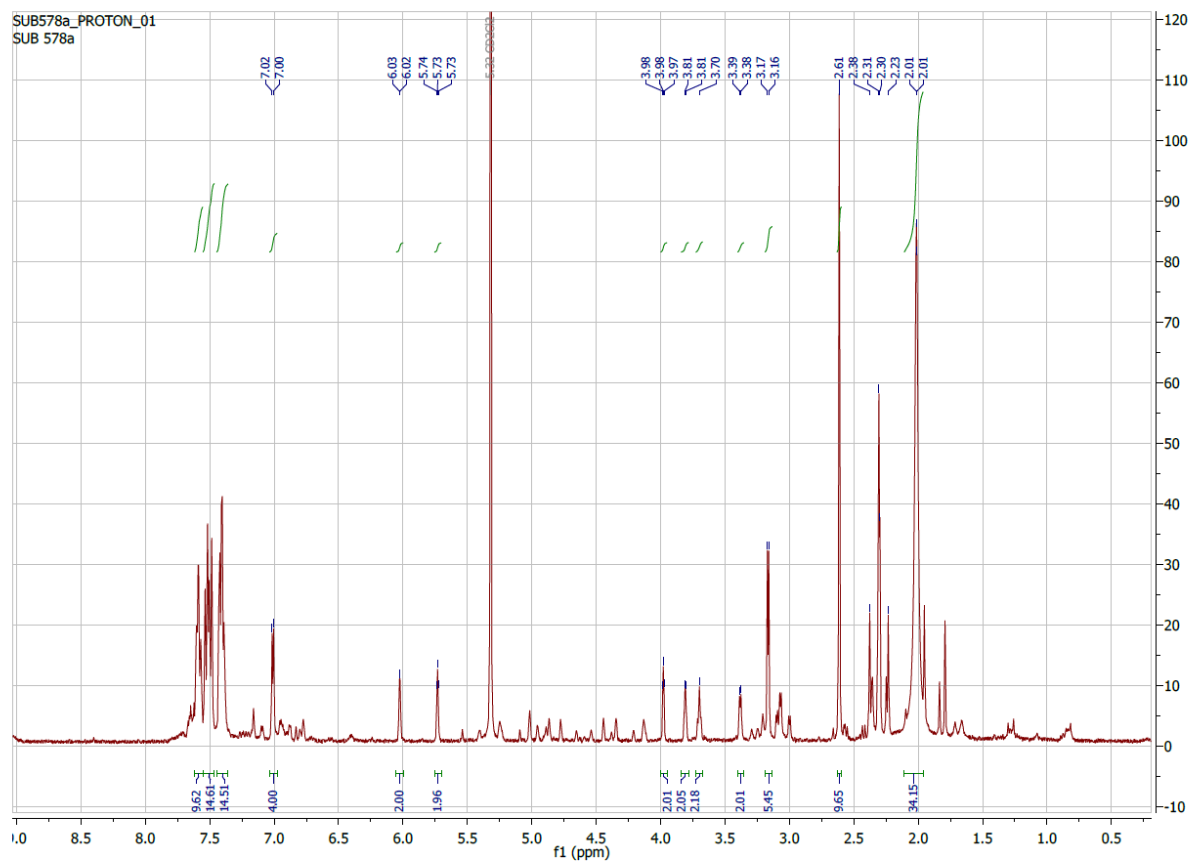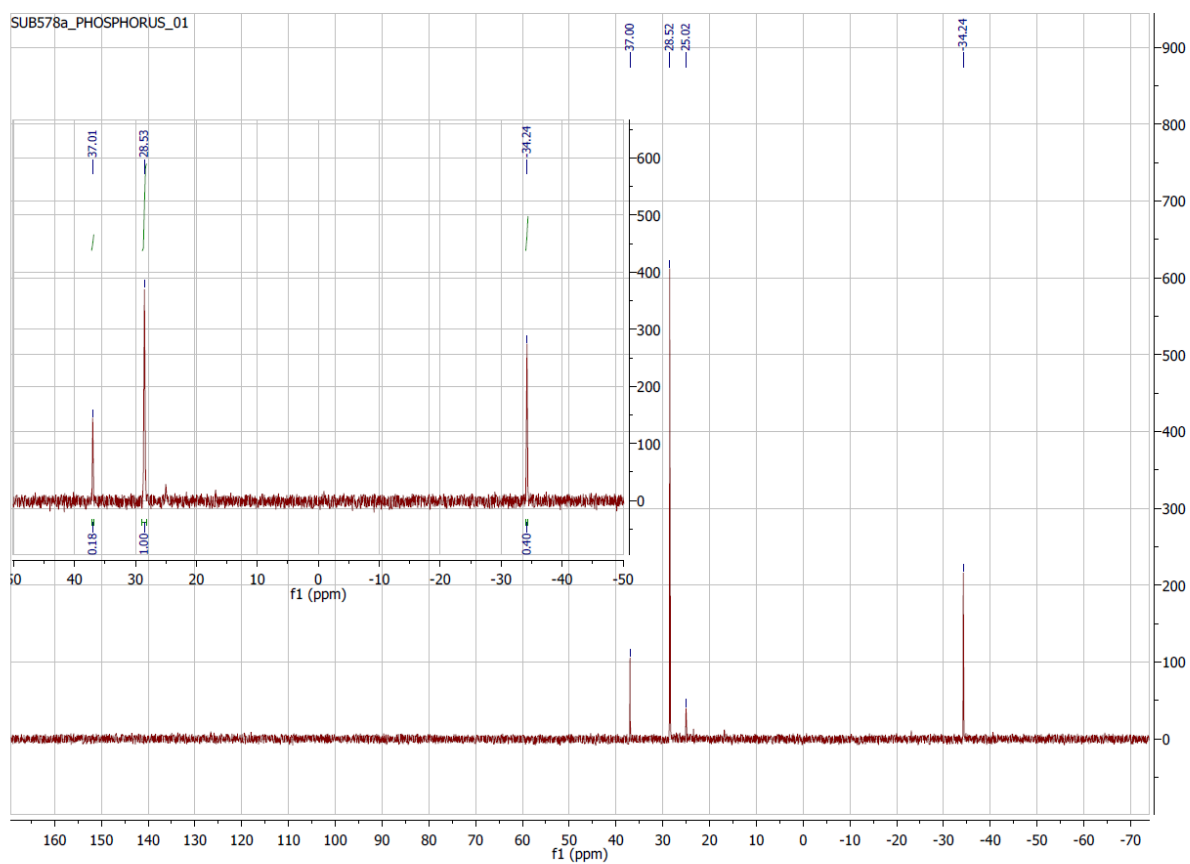

**Fig S58.**  $^1\text{H}$  and  $^{31}\text{P}\{^1\text{H}\}$  NMR for unsuccessful synthesis of  $[\text{Fc}'(\text{NMe}_2)(\text{PMe}_2)\cdot\text{Pd}][\text{BF}_4]_2$ , measured in  $\text{CD}_2\text{Cl}_2$ . The signal at  $-34.00$  ppm is resulting from the unreacted  $\text{Fc}'(\text{NMe}_2)(\text{PMe}_2)$ .

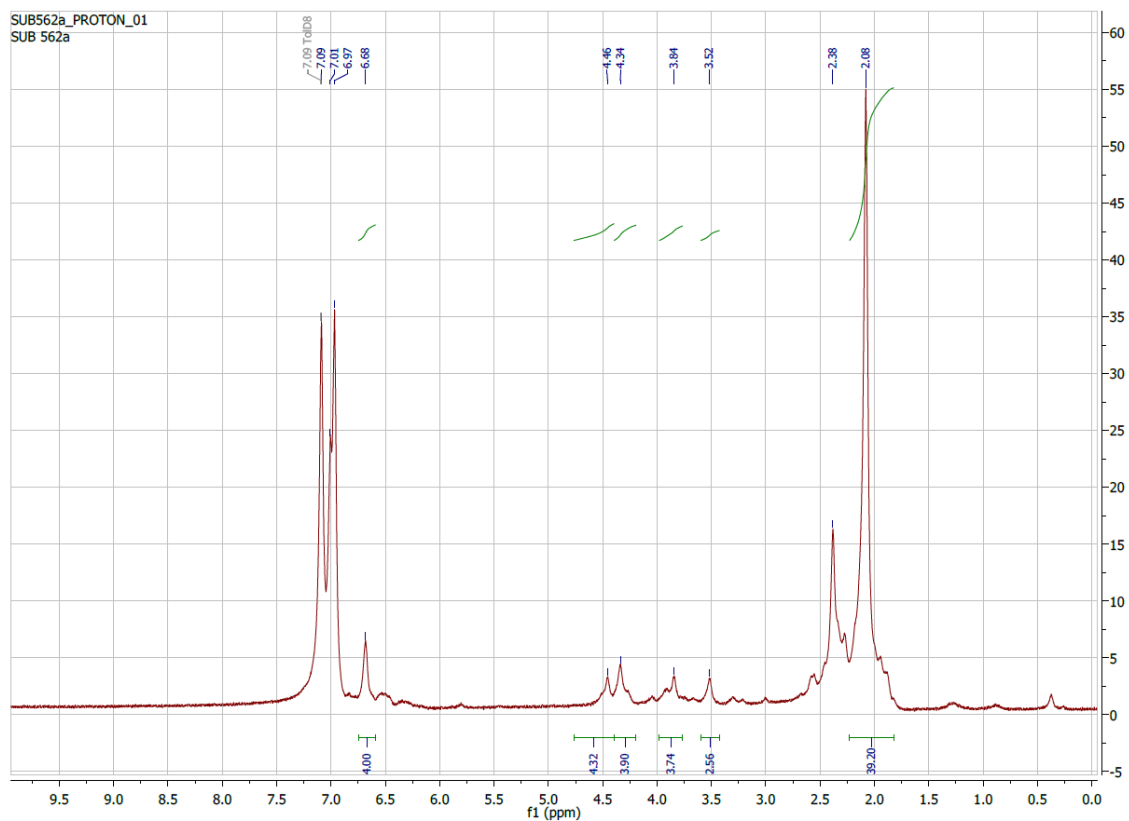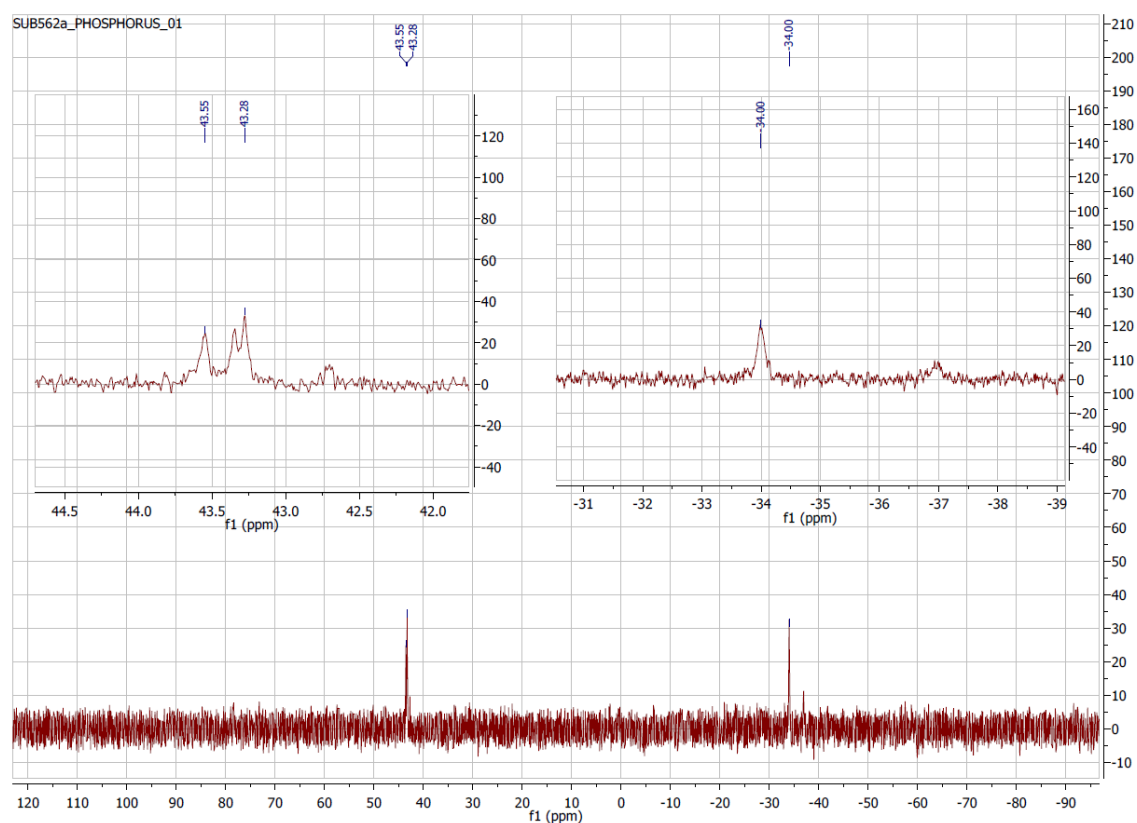

**Fig S59.**  $^1\text{H}$  and  $^{31}\text{P}\{^1\text{H}\}$  NMR for unsuccessful synthesis of  $[\text{Fc}'(\text{NMe}_2)(\text{PMe}_2)\cdot\text{PdCl}_2]$ , measured in Toluene D8.

The signal at -34.00 ppm is resulting from the unreacted  $\text{Fc}'(\text{NMe}_2)(\text{PMe}_2)$ .

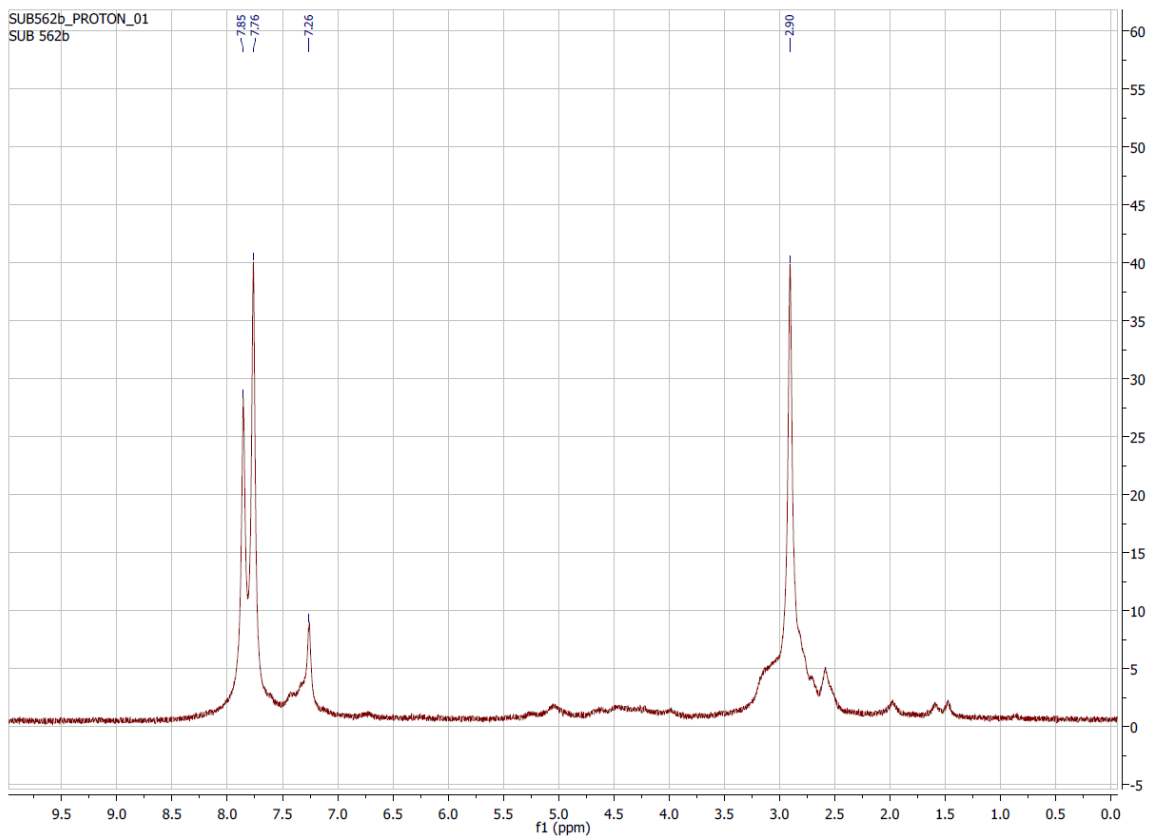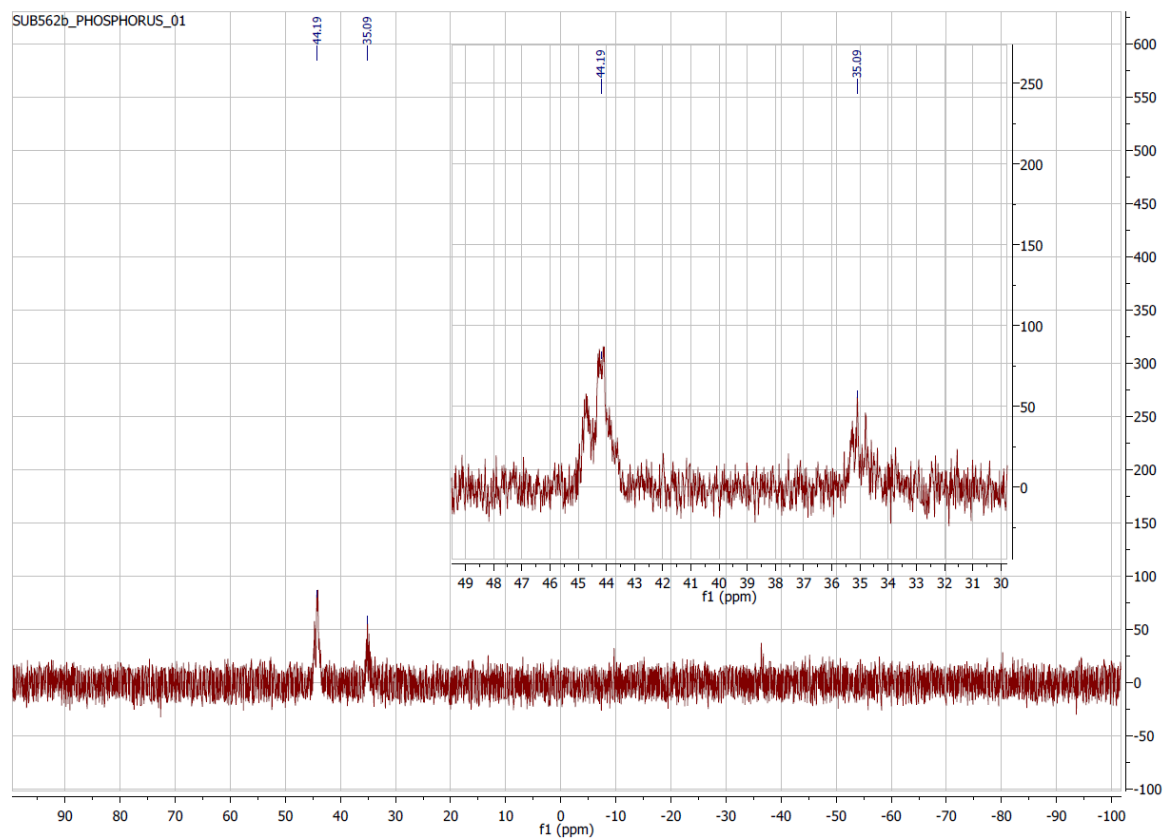

**Fig S60.**  $^1\text{H}$  and  $^{31}\text{P}\{^1\text{H}\}$  NMR for unsuccessful synthesis of  $[\text{Fc}'(\text{NMe}_2)(\text{PMe}_2)\cdot\text{PdCl}_2]$ , measured in Toluene D8 after heating at  $50^\circ\text{C}$  for 2 hrs.



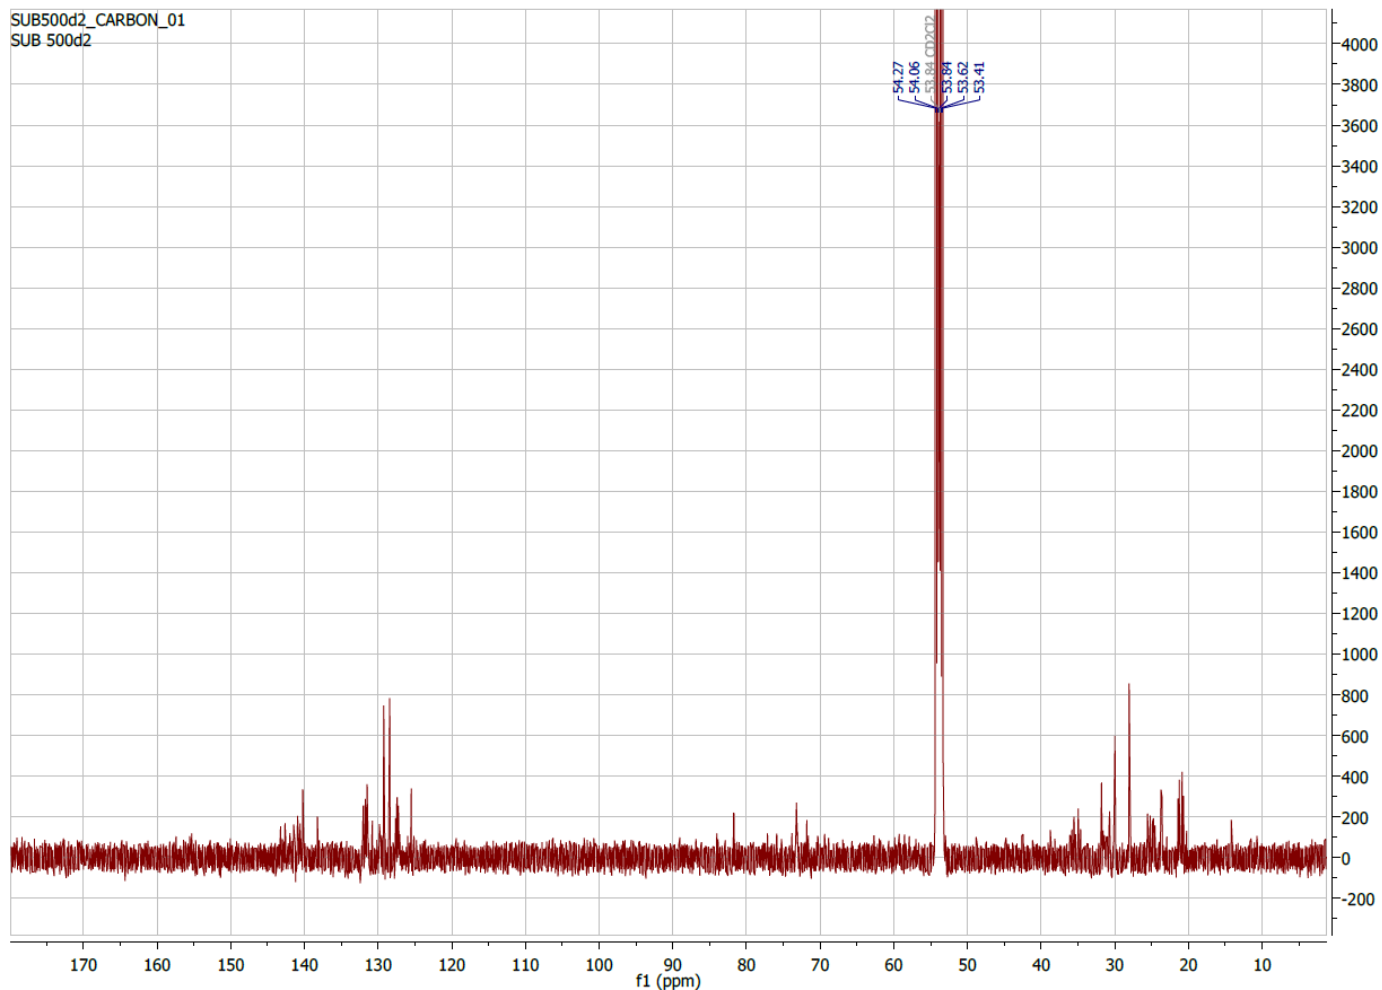

**Fig S61.**  $^{13}\text{C}$  NMR of  $[\text{Fc}'(\text{PMes}_2)(\text{P}^t\text{Bu}_2) \cdot \text{PdCl}_2]$  (**8**), measured in  $\text{CD}_2\text{Cl}_2$ .

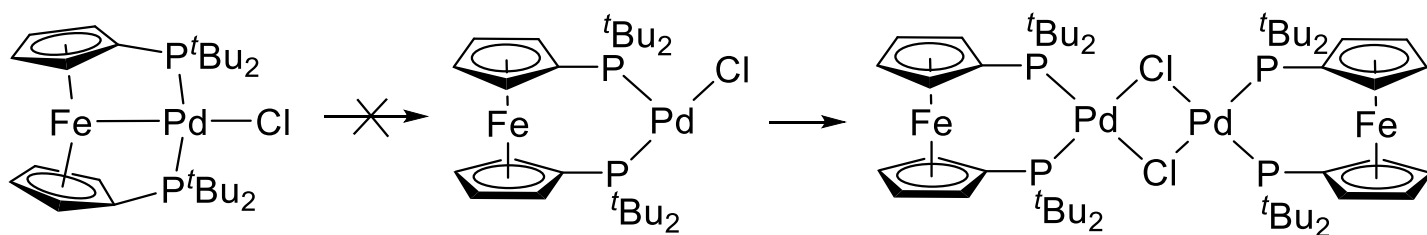

**Fig S62.** Isomer of  $[\text{dtbpf} \cdot \text{PdCl}]^+$  with Fe-Pd interaction and dimer with T-shaped geometry around Pd center.

**Table S3.** Crystal Refinement data of Compounds **1**, **3** and **4a**.

| Acronym                                     | <b>1</b>                                                      | <b>3a</b>                                                     | <b>3b</b>                                                     | <b>4a</b>                                                     |
|---------------------------------------------|---------------------------------------------------------------|---------------------------------------------------------------|---------------------------------------------------------------|---------------------------------------------------------------|
| CCDC Deposition Number                      | 2243451                                                       | 217930                                                        | 2243452                                                       | 2243453                                                       |
| Empirical formula                           | C <sub>10</sub> H <sub>10</sub> BrFeN                         | C <sub>24</sub> H <sub>24</sub> FeNP                          | C <sub>30</sub> H <sub>36</sub> FeNP                          | C <sub>24</sub> H <sub>24</sub> FeNPSe                        |
| Formula weight                              | 279.95                                                        | 413.26                                                        | 497.42                                                        | 492.22                                                        |
| Temperature/K                               | 100(2)                                                        | 100(2)                                                        | 100(2)                                                        | 100                                                           |
| Crystal system                              | monoclinic                                                    | monoclinic                                                    | triclinic                                                     | triclinic                                                     |
| Space group                                 | P2 <sub>1</sub> /c                                            | P2 <sub>1</sub> /c                                            | P-1                                                           | P-1                                                           |
| a/Å                                         | 12.3649(8)                                                    | 8.4135(7)                                                     | 9.2998(6)                                                     | 8.6171(9)                                                     |
| b/Å                                         | 7.4650(4)                                                     | 16.8152(15)                                                   | 9.8582(6)                                                     | 9.6018(13)                                                    |
| c/Å                                         | 10.4750(6)                                                    | 28.089(2)                                                     | 14.4614(9)                                                    | 13.2757(19)                                                   |
| α/°                                         | 90                                                            | 90                                                            | 80.415(5)                                                     | 89.994(11)                                                    |
| β/°                                         | 99.832(5)                                                     | 90.863(6)                                                     | 74.260(5)                                                     | 100.144(10)                                                   |
| γ/°                                         | 90                                                            | 90                                                            | 78.804(5)                                                     | 106.456(10)                                                   |
| Volume/Å <sup>3</sup>                       | 952.68(10)                                                    | 3973.5(6)                                                     | 1242.68(14)                                                   | 1035.5(2)                                                     |
| Z                                           | 4                                                             | 8                                                             | 2                                                             | 2                                                             |
| ρ <sub>calc</sub> /cm <sup>3</sup>          | 1.952                                                         | 1.382                                                         | 1.329                                                         | 1.579                                                         |
| μ/mm <sup>-1</sup>                          | 5.723                                                         | 6.891                                                         | 0.690                                                         | 8.638                                                         |
| F(000)                                      | 552.0                                                         | 1728.0                                                        | 528.0                                                         | 500.0                                                         |
| Crystal size/mm <sup>3</sup>                | 0.17 × 0.107 × 0.02                                           | 0.089 × 0.075 × 0.048                                         | 0.36 × 0.233 × 0.05                                           | 0.322 × 0.243 × 0.129                                         |
| Radiation                                   | MoKα (λ = 0.71073)                                            | Cu Kα (λ = 1.54186)                                           | Mo Kα (λ = 0.71073)                                           | Cu Kα (λ = 1.54186)                                           |
| 2θ range for data collection/°              | 3.342 to 51.448                                               | 6.126 to 142.006                                              | 2.948 to 51.466                                               | 6.774 to 143.67                                               |
| Index ranges                                | -15 ≤ h ≤ 15, -9 ≤ k ≤ 7, -12 ≤ l ≤ 10                        | -10 ≤ h ≤ 8, -14 ≤ k ≤ 20, -20 ≤ l ≤ 33                       | -11 ≤ h ≤ 11, -11 ≤ k ≤ 11, -17 ≤ l ≤ 17                      | -5 ≤ h ≤ 10, -11 ≤ k ≤ 10, -16 ≤ l ≤ 15                       |
| Reflections collected                       | 3771                                                          | 17195                                                         | 8697                                                          | 8726                                                          |
| Independent reflections                     | 1793 [R <sub>int</sub> = 0.0215, R <sub>sigma</sub> = 0.0216] | 7308 [R <sub>int</sub> = 0.0303, R <sub>sigma</sub> = 0.0407] | 4677 [R <sub>int</sub> = 0.0465, R <sub>sigma</sub> = 0.0416] | 3917 [R <sub>int</sub> = 0.0272, R <sub>sigma</sub> = 0.0268] |
| Data/restraints/parameters                  | 1793/2/124                                                    | 7308/0/491                                                    | 4677/0/306                                                    | 3917/0/255                                                    |
| Goodness-of-fit on F <sup>2</sup>           | 1.077                                                         | 1.070                                                         | 1.116                                                         | 1.047                                                         |
| Final R indexes [I >= 2σ (I)]               | R <sub>1</sub> = 0.0364, wR <sub>2</sub> = 0.0960             | R <sub>1</sub> = 0.0410, wR <sub>2</sub> = 0.0831             | R <sub>1</sub> = 0.0598, wR <sub>2</sub> = 0.1653             | R <sub>1</sub> = 0.0386, wR <sub>2</sub> = 0.0990             |
| Final R indexes [all data]                  | R <sub>1</sub> = 0.0453, wR <sub>2</sub> = 0.1012             | R <sub>1</sub> = 0.0606, wR <sub>2</sub> = 0.0904             | R <sub>1</sub> = 0.0668, wR <sub>2</sub> = 0.1755             | R <sub>1</sub> = 0.0410, wR <sub>2</sub> = 0.1008             |
| Largest diff. peak/hole / e Å <sup>-3</sup> | 0.62/-0.80                                                    | 0.41/-0.27                                                    | 0.72/-0.95                                                    | 0.71/-1.10                                                    |

**Table S4.** Crystal Refinement data of Compounds **7-9**.

| Acronym                                     | <b>7</b>                                                            | <b>8</b>                                                            | <b>9</b>                                                                                         |
|---------------------------------------------|---------------------------------------------------------------------|---------------------------------------------------------------------|--------------------------------------------------------------------------------------------------|
| CCDC Deposition Number                      | 2243454                                                             | 2243455                                                             | 2243456                                                                                          |
| Empirical formula                           | C <sub>41</sub> H <sub>42</sub> Cl <sub>4</sub> FeP <sub>2</sub> Pd | C <sub>38</sub> H <sub>52</sub> Cl <sub>6</sub> FeP <sub>2</sub> Pd | C <sub>48</sub> H <sub>48</sub> Cl <sub>2</sub> Fe <sub>2</sub> N <sub>2</sub> P <sub>2</sub> Pd |
| Formula weight                              | 900.73                                                              | 945.68                                                              | 1003.82                                                                                          |
| Temperature/K                               | 100                                                                 | 100                                                                 | 100                                                                                              |
| Crystal system                              | triclinic                                                           | monoclinic                                                          | monoclinic                                                                                       |
| Space group                                 | P-1                                                                 | P2 <sub>1</sub> /c                                                  | P2 <sub>1</sub> /n                                                                               |
| a/Å                                         | 10.8066(6)                                                          | 19.0610(9)                                                          | 10.135(3)                                                                                        |
| b/Å                                         | 11.6528(7)                                                          | 10.2156(3)                                                          | 14.632(14)                                                                                       |
| c/Å                                         | 17.1079(9)                                                          | 21.9718(10)                                                         | 14.651(3)                                                                                        |
| α/°                                         | 75.563(4)                                                           | 90                                                                  | 90                                                                                               |
| β/°                                         | 78.165(4)                                                           | 110.152(4)                                                          | 100.75(2)                                                                                        |
| γ/°                                         | 62.693(4)                                                           | 90                                                                  | 90                                                                                               |
| Volume/Å <sup>3</sup>                       | 1843.49(19)                                                         | 4016.4(3)                                                           | 2134(2)                                                                                          |
| Z                                           | 2                                                                   | 4                                                                   | 2                                                                                                |
| ρ <sub>calc</sub> /cm <sup>3</sup>          | 1.623                                                               | 1.564                                                               | 1.562                                                                                            |
| μ/mm <sup>-1</sup>                          | 1.289                                                               | 1.315                                                               | 10.882                                                                                           |
| F(000)                                      | 916.0                                                               | 1936.0                                                              | 1024.0                                                                                           |
| Crystal size/mm <sup>3</sup>                | 0.34 × 0.173 × 0.05                                                 | 0.24 × 0.107 × 0.02                                                 | 0.16 × 0.07 × 0.02                                                                               |
| Radiation                                   | Mo Kα (λ = 0.71073)                                                 | Mo Kα (λ = 0.71073)                                                 | Cu Kα (λ = 1.54186)                                                                              |
| 2θ range for data collection/°              | 2.472 to 51.504                                                     | 3.818 to 51.648                                                     | 8.618 to 141.91                                                                                  |
| Index ranges                                | -13 ≤ h ≤ 11, -14 ≤ k ≤ 14, -20 ≤ l ≤ 19                            | -23 ≤ h ≤ 23, -12 ≤ k ≤ 12, -26 ≤ l ≤ 26                            | -11 ≤ h ≤ 12, -17 ≤ k ≤ 17, -10 ≤ l ≤ 17                                                         |
| Reflections collected                       | 13347                                                               | 22037                                                               | 13111                                                                                            |
| Independent reflections                     | 6971 [R <sub>int</sub> = 0.0204, R <sub>sigma</sub> = 0.0212]       | 7641 [R <sub>int</sub> = 0.0749, R <sub>sigma</sub> = 0.0647]       | 3944 [R <sub>int</sub> = 0.0453, R <sub>sigma</sub> = 0.0440]                                    |
| Data/restraints/parameters                  | 6971/0/448                                                          | 7641/0/445                                                          | 3944/0/261                                                                                       |
| Goodness-of-fit on F <sup>2</sup>           | 1.064                                                               | 1.067                                                               | 1.046                                                                                            |
| Final R indexes [I>=2σ (I)]                 | R <sub>1</sub> = 0.0273, wR <sub>2</sub> = 0.0707                   | R <sub>1</sub> = 0.0562, wR <sub>2</sub> = 0.1322                   | R <sub>1</sub> = 0.0524, wR <sub>2</sub> = 0.1203                                                |
| Final R indexes [all data]                  | R <sub>1</sub> = 0.0314, wR <sub>2</sub> = 0.0722                   | R <sub>1</sub> = 0.0787, wR <sub>2</sub> = 0.1480                   | R <sub>1</sub> = 0.0763, wR <sub>2</sub> = 0.1348                                                |
| Largest diff. peak/hole / e Å <sup>-3</sup> | 0.40/-0.49                                                          | 1.04/-1.36                                                          | 0.96/-1.77                                                                                       |

**Table S5.** Crystal Refinement data of Compounds **10-15**.

| Acronym                                     | <b>10</b>                                                              | <b>11</b>                                                     | <b>12</b>                                                                           | <b>13</b>                                                                                          | <b>14</b>                                                                                                      | <b>15</b>                                                                                         |
|---------------------------------------------|------------------------------------------------------------------------|---------------------------------------------------------------|-------------------------------------------------------------------------------------|----------------------------------------------------------------------------------------------------|----------------------------------------------------------------------------------------------------------------|---------------------------------------------------------------------------------------------------|
| CCDC Deposition Number                      | 2243457                                                                | 2243458                                                       | 2243459                                                                             | 2243460                                                                                            | 2243461                                                                                                        | 2243462                                                                                           |
| Empirical formula                           | C <sub>36</sub> H <sub>48</sub> ClF <sub>6</sub> FeP <sub>2</sub> PdSb | C <sub>24</sub> H <sub>24</sub> ClF <sub>6</sub> FeNPdSb      | C <sub>41</sub> H <sub>39</sub> F <sub>12</sub> FeNP <sub>2</sub> PdSb <sub>2</sub> | C <sub>43</sub> H <sub>41</sub> B <sub>2</sub> Cl <sub>2</sub> F <sub>8</sub> FeNP <sub>2</sub> Pd | C <sub>48</sub> H <sub>48</sub> B <sub>2</sub> F <sub>8</sub> Fe <sub>2</sub> N <sub>2</sub> P <sub>2</sub> Pd | C <sub>45</sub> H <sub>45</sub> B <sub>2</sub> F <sub>8</sub> FeNO <sub>3</sub> P <sub>2</sub> Pd |
| Formula weight                              | 976.13                                                                 | 790.86                                                        | 1241.42                                                                             | 1040.48                                                                                            | 1106.54                                                                                                        | 1045.63                                                                                           |
| Temperature/K                               | 100                                                                    | 100                                                           | 100                                                                                 | 100                                                                                                | 100                                                                                                            | 100                                                                                               |
| Crystal system                              | triclinic                                                              | monoclinic                                                    | monoclinic                                                                          | monoclinic                                                                                         | monoclinic                                                                                                     | monoclinic                                                                                        |
| Space group                                 | P-1                                                                    | P2 <sub>1</sub> /n                                            | P2 <sub>1</sub> /c                                                                  | P2 <sub>1</sub> /n                                                                                 | C2/c                                                                                                           | P2/c                                                                                              |
| a/Å                                         | 12.667(3)                                                              | 12.9682(7)                                                    | 16.508(16)                                                                          | 9.4973(17)                                                                                         | 30.8242(14)                                                                                                    | 22.1592(9)                                                                                        |
| b/Å                                         | 16.343(2)                                                              | 10.3965(4)                                                    | 14.757(6)                                                                           | 31.289(15)                                                                                         | 13.9370(4)                                                                                                     | 9.5811(3)                                                                                         |
| c/Å                                         | 20.387(6)                                                              | 19.4858(11)                                                   | 17.421(16)                                                                          | 14.506(4)                                                                                          | 25.8720(10)                                                                                                    | 21.0726(9)                                                                                        |
| α/°                                         | 92.695(18)                                                             | 90                                                            | 90                                                                                  | 90                                                                                                 | 90                                                                                                             | 90                                                                                                |
| β/°                                         | 107.49(2)                                                              | 103.946(4)                                                    | 93.66(8)                                                                            | 98.711(18)                                                                                         | 102.787(3)                                                                                                     | 93.274(3)                                                                                         |
| γ/°                                         | 107.202(14)                                                            | 90                                                            | 90                                                                                  | 90                                                                                                 | 90                                                                                                             | 90                                                                                                |
| Volume/Å <sup>3</sup>                       | 3802.0(15)                                                             | 2549.7(2)                                                     | 4235(6)                                                                             | 4261(2)                                                                                            | 10838.9(7)                                                                                                     | 4466.6(3)                                                                                         |
| Z                                           | 4                                                                      | 4                                                             | 4                                                                                   | 4                                                                                                  | 8                                                                                                              | 4                                                                                                 |
| ρ <sub>calc</sub> /cm <sup>3</sup>          | 1.705                                                                  | 2.060                                                         | 1.947                                                                               | 1.622                                                                                              | 1.356                                                                                                          | 1.555                                                                                             |
| μ/mm <sup>-1</sup>                          | 1.759                                                                  | 20.576                                                        | 2.176                                                                               | 8.596                                                                                              | 7.951                                                                                                          | 7.181                                                                                             |
| F(000)                                      | 1952.0                                                                 | 1536.0                                                        | 2416.0                                                                              | 2096.0                                                                                             | 4480.0                                                                                                         | 2120.0                                                                                            |
| Crystal size/mm <sup>3</sup>                | 0.12 × 0.07 × 0.03                                                     | 0.15 × 0.083 × 0.02                                           | 0.12 × 0.083 × 0.06                                                                 | 0.15 × 0.073 × 0.01                                                                                | 0.25 × 0.107 × 0.03                                                                                            | 0.192 × 0.091 × 0.015                                                                             |
| Radiation                                   | Mo Kα (λ = 0.71073)                                                    | Cu Kα (λ = 1.54186)                                           | Mo Kα (λ = 0.71073)                                                                 | Cu Kα (λ = 1.54186)                                                                                | Cu Kα (λ = 1.54186)                                                                                            | Cu Kα (λ = 1.54186)                                                                               |
| 2θ range for data collection/°              | 4.622 to 52                                                            | 9.354 to 141.404                                              | 4.468 to 65.432                                                                     | 6.78 to 141.722                                                                                    | 6.992 to 142.75                                                                                                | 7.992 to 142.956                                                                                  |
| Index ranges                                | -15 ≤ h ≤ 12, -19 ≤ k ≤ 20, -22 ≤ l ≤ 25                               | -15 ≤ h ≤ 13, -12 ≤ k ≤ 5, -23 ≤ l ≤ 21                       | -24 ≤ h ≤ 17, -21 ≤ k ≤ 14, -26 ≤ l ≤ 22                                            | -11 ≤ h ≤ 5, -37 ≤ k ≤ 30, -17 ≤ l ≤ 16                                                            | -37 ≤ h ≤ 30, -16 ≤ k ≤ 7, -31 ≤ l ≤ 30                                                                        | -26 ≤ h ≤ 26, -4 ≤ k ≤ 11, -18 ≤ l ≤ 25                                                           |
| Reflections collected                       | 29707                                                                  | 10456                                                         | 29678                                                                               | 18315                                                                                              | 22334                                                                                                          | 19338                                                                                             |
| Independent reflections                     | 14665 [R <sub>int</sub> = 0.0332, R <sub>sigma</sub> = 0.0591]         | 4707 [R <sub>int</sub> = 0.0765, R <sub>sigma</sub> = 0.0678] | 13195 [R <sub>int</sub> = 0.0996, R <sub>sigma</sub> = 0.1798]                      | 7779 [R <sub>int</sub> = 0.0821, R <sub>sigma</sub> = 0.0806]                                      | 10214 [R <sub>int</sub> = 0.0637, R <sub>sigma</sub> = 0.0610]                                                 | 8418 [R <sub>int</sub> = 0.0588, R <sub>sigma</sub> = 0.0622]                                     |
| Data/restraints/parameters                  | 14665/0/889                                                            | 4707/0/327                                                    | 13195/0/543                                                                         | 7779/0/543                                                                                         | 10214/0/590                                                                                                    | 8418/9/574                                                                                        |
| Goodness-of-fit on F <sup>2</sup>           | 1.006                                                                  | 1.025                                                         | 0.994                                                                               | 1.023                                                                                              | 1.044                                                                                                          | 1.016                                                                                             |
| Final R indexes [I ≥ 2σ (I)]                | R <sub>1</sub> = 0.0411, wR <sub>2</sub> = 0.0808                      | R <sub>1</sub> = 0.0832, wR <sub>2</sub> = 0.2208             | R <sub>1</sub> = 0.0706, wR <sub>2</sub> = 0.1291                                   | R <sub>1</sub> = 0.0945, wR <sub>2</sub> = 0.2395                                                  | R <sub>1</sub> = 0.0653, wR <sub>2</sub> = 0.1717                                                              | R <sub>1</sub> = 0.0726, wR <sub>2</sub> = 0.1831                                                 |
| Final R indexes [all data]                  | R <sub>1</sub> = 0.0726, wR <sub>2</sub> = 0.0916                      | R <sub>1</sub> = 0.1001, wR <sub>2</sub> = 0.2427             | R <sub>1</sub> = 0.1884, wR <sub>2</sub> = 0.1689                                   | R <sub>1</sub> = 0.1272, wR <sub>2</sub> = 0.2730                                                  | R <sub>1</sub> = 0.0892, wR <sub>2</sub> = 0.1902                                                              | R <sub>1</sub> = 0.0959, wR <sub>2</sub> = 0.2033                                                 |
| Largest diff. peak/hole / e Å <sup>-3</sup> | 3.50/-0.91                                                             | 1.75/-2.94                                                    | 1.13/-1.34                                                                          | 1.89/-1.82                                                                                         | 0.79/-1.81                                                                                                     | 1.44/-2.00                                                                                        |

**Table S6: Bond lengths and angles for compound 1**

| Atom | Atom | Length/Å | Atom | Atom | Length/Å |
|------|------|----------|------|------|----------|
| N1   | C6   | 1.477(6) | Fe1  | C8   | 2.021(4) |
| Br1  | C1   | 1.883(4) | Fe1  | C9   | 2.011(4) |
| C1   | Fe1  | 2.018(4) | Fe1  | C10  | 2.043(4) |
| C1   | C2   | 1.415(6) | C2   | C3   | 1.419(6) |
| C1   | C5   | 1.411(6) | C3   | C4   | 1.416(6) |
| Fe1  | C2   | 2.028(4) | C4   | C5   | 1.428(6) |
| Fe1  | C3   | 2.034(4) | C6   | C7   | 1.396(7) |
| Fe1  | C4   | 2.045(4) | C6   | C10  | 1.421(7) |
| Fe1  | C5   | 2.041(4) | C7   | C8   | 1.418(7) |
| Fe1  | C6   | 2.082(4) | C8   | C9   | 1.391(7) |
| Fe1  | C7   | 2.043(4) | C9   | C10  | 1.409(7) |

  

| Atom | Atom | Atom | Angle/°    | Atom | Atom | Atom | Angle/°    |
|------|------|------|------------|------|------|------|------------|
| Br1  | C1   | Fe1  | 127.7(2)   | C9   | Fe1  | C3   | 107.85(17) |
| C2   | C1   | Br1  | 124.2(3)   | C9   | Fe1  | C4   | 123.28(18) |
| C2   | C1   | Fe1  | 69.9(2)    | C9   | Fe1  | C5   | 159.2(2)   |
| C5   | C1   | Br1  | 126.0(3)   | C9   | Fe1  | C6   | 67.68(18)  |
| C5   | C1   | Fe1  | 70.6(2)    | C9   | Fe1  | C7   | 68.13(19)  |
| C5   | C1   | C2   | 109.8(4)   | C9   | Fe1  | C8   | 40.4(2)    |
| C1   | Fe1  | C2   | 40.95(17)  | C9   | Fe1  | C10  | 40.7(2)    |
| C1   | Fe1  | C3   | 68.30(17)  | C10  | Fe1  | C4   | 159.6(2)   |
| C1   | Fe1  | C4   | 68.20(17)  | C10  | Fe1  | C6   | 40.30(19)  |
| C1   | Fe1  | C5   | 40.66(17)  | C10  | Fe1  | C7   | 67.77(19)  |
| C1   | Fe1  | C6   | 108.33(17) | C1   | C2   | Fe1  | 69.2(2)    |
| C1   | Fe1  | C7   | 122.92(18) | C1   | C2   | C3   | 106.7(4)   |
| C1   | Fe1  | C8   | 159.2(2)   | C3   | C2   | Fe1  | 69.8(2)    |
| C1   | Fe1  | C10  | 122.83(19) | C2   | C3   | Fe1  | 69.3(2)    |
| C2   | Fe1  | C3   | 40.91(18)  | C4   | C3   | Fe1  | 70.1(2)    |
| C2   | Fe1  | C4   | 68.84(17)  | C4   | C3   | C2   | 108.6(4)   |
| C2   | Fe1  | C5   | 69.25(17)  | C3   | C4   | Fe1  | 69.3(2)    |
| C2   | Fe1  | C6   | 123.43(18) | C3   | C4   | C5   | 108.1(4)   |
| C2   | Fe1  | C7   | 158.71(19) | C5   | C4   | Fe1  | 69.4(2)    |
| C2   | Fe1  | C10  | 107.26(18) | C1   | C5   | Fe1  | 68.8(2)    |
| C3   | Fe1  | C4   | 40.62(17)  | C1   | C5   | C4   | 106.8(4)   |
| C3   | Fe1  | C5   | 68.79(18)  | C4   | C5   | Fe1  | 69.7(2)    |
| C3   | Fe1  | C6   | 159.78(19) | N1   | C6   | Fe1  | 129.5(3)   |
| C3   | Fe1  | C7   | 159.14(19) | C7   | C6   | N1   | 127.2(5)   |
| C3   | Fe1  | C10  | 123.45(18) | C7   | C6   | Fe1  | 68.7(2)    |
| C4   | Fe1  | C6   | 158.47(19) | C7   | C6   | C10  | 107.9(4)   |
| C5   | Fe1  | C4   | 40.90(17)  | C10  | C6   | N1   | 124.8(5)   |
| C5   | Fe1  | C6   | 122.55(18) | C10  | C6   | Fe1  | 68.4(2)    |
| C5   | Fe1  | C7   | 107.28(18) | C6   | C7   | Fe1  | 71.7(2)    |
| C5   | Fe1  | C10  | 158.3(2)   | C6   | C7   | C8   | 108.1(4)   |
| C7   | Fe1  | C4   | 123.12(18) | C8   | C7   | Fe1  | 68.7(2)    |
| C7   | Fe1  | C6   | 39.53(19)  | C7   | C8   | Fe1  | 70.4(2)    |
| C8   | Fe1  | C2   | 158.58(19) | C9   | C8   | Fe1  | 69.4(2)    |
| C8   | Fe1  | C3   | 122.85(18) | C9   | C8   | C7   | 107.9(4)   |

|    |     |     |            |     |     |     |          |
|----|-----|-----|------------|-----|-----|-----|----------|
| C8 | Fe1 | C4  | 107.80(18) | C8  | C9  | Fe1 | 70.2(2)  |
| C8 | Fe1 | C5  | 122.96(19) | C8  | C9  | C10 | 108.7(4) |
| C8 | Fe1 | C6  | 67.45(18)  | C10 | C9  | Fe1 | 70.9(3)  |
| C8 | Fe1 | C7  | 40.85(19)  | C6  | C10 | Fe1 | 71.3(2)  |
| C8 | Fe1 | C10 | 68.1(2)    | C9  | C10 | Fe1 | 68.4(2)  |
| C9 | Fe1 | C1  | 158.92(19) | C9  | C10 | C6  | 107.3(4) |
| C9 | Fe1 | C2  | 122.53(19) |     |     |     |          |

**Table S7:** Bond lengths and angles for compound **3a**

| Atom | Atom | Length/Å | Atom | Atom | Length/Å |
|------|------|----------|------|------|----------|
| Fe1  | C1   | 2.040(3) | Fe2  | C25  | 2.038(3) |
| Fe1  | C2   | 2.048(3) | Fe2  | C26  | 2.035(3) |
| Fe1  | C3   | 2.057(3) | Fe2  | C27  | 2.045(3) |
| Fe1  | C4   | 2.051(3) | Fe2  | C28  | 2.055(3) |
| Fe1  | C5   | 2.049(3) | Fe2  | C29  | 2.044(3) |
| Fe1  | C6   | 2.112(3) | Fe2  | C30  | 2.088(3) |
| Fe1  | C7   | 2.061(3) | Fe2  | C31  | 2.046(3) |
| Fe1  | C8   | 2.033(3) | Fe2  | C32  | 2.029(3) |
| Fe1  | C9   | 2.028(3) | Fe2  | C33  | 2.031(3) |
| Fe1  | C10  | 2.050(3) | Fe2  | C34  | 2.044(3) |
| P1   | C1   | 1.814(3) | P2   | C25  | 1.814(3) |
| P1   | C11  | 1.837(3) | P2   | C35  | 1.835(3) |
| P1   | C17  | 1.844(3) | P2   | C41  | 1.840(3) |
| N1   | C6   | 1.391(4) | N2   | C30  | 1.400(4) |
| N1   | C23  | 1.453(4) | N2   | C47  | 1.469(4) |
| N1   | C24  | 1.459(4) | N2   | C48  | 1.453(4) |
| C1   | C2   | 1.436(4) | C25  | C26  | 1.438(4) |
| C1   | C5   | 1.435(4) | C25  | C29  | 1.430(4) |
| C2   | C3   | 1.437(4) | C26  | C27  | 1.419(4) |
| C3   | C4   | 1.420(4) | C27  | C28  | 1.425(4) |
| C4   | C5   | 1.426(4) | C28  | C29  | 1.419(4) |
| C6   | C7   | 1.439(4) | C30  | C31  | 1.431(4) |
| C6   | C10  | 1.433(4) | C30  | C34  | 1.421(4) |
| C7   | C8   | 1.431(4) | C31  | C32  | 1.429(4) |
| C8   | C9   | 1.404(5) | C32  | C33  | 1.418(4) |
| C9   | C10  | 1.424(4) | C33  | C34  | 1.422(4) |
| C11  | C12  | 1.390(4) | C35  | C36  | 1.396(4) |
| C11  | C16  | 1.402(4) | C35  | C40  | 1.396(4) |
| C12  | C13  | 1.386(4) | C36  | C37  | 1.391(4) |
| C13  | C14  | 1.382(5) | C37  | C38  | 1.387(5) |
| C14  | C15  | 1.392(5) | C38  | C39  | 1.382(4) |
| C15  | C16  | 1.385(4) | C39  | C40  | 1.390(4) |
| C17  | C18  | 1.396(4) | C41  | C42  | 1.395(4) |
| C17  | C22  | 1.397(4) | C41  | C46  | 1.399(4) |
| C18  | C19  | 1.385(4) | C42  | C43  | 1.382(5) |
| C19  | C20  | 1.388(4) | C43  | C44  | 1.376(5) |
| C20  | C21  | 1.391(4) | C44  | C45  | 1.387(5) |
| C21  | C22  | 1.382(4) | C45  | C46  | 1.390(4) |

| Atom | Atom | Atom | Angle/°    | Atom | Atom | Atom | Angle/°    |
|------|------|------|------------|------|------|------|------------|
| C1   | Fe1  | C2   | 41.13(11)  | C25  | Fe2  | C27  | 69.13(11)  |
| C1   | Fe1  | C3   | 69.15(11)  | C25  | Fe2  | C28  | 68.95(11)  |
| C1   | Fe1  | C4   | 68.95(11)  | C25  | Fe2  | C29  | 41.00(11)  |
| C1   | Fe1  | C5   | 41.09(11)  | C25  | Fe2  | C30  | 124.27(12) |
| C1   | Fe1  | C6   | 124.17(11) | C25  | Fe2  | C31  | 160.43(12) |
| C1   | Fe1  | C7   | 160.81(11) | C25  | Fe2  | C34  | 107.67(11) |
| C1   | Fe1  | C10  | 106.72(11) | C26  | Fe2  | C25  | 41.35(11)  |
| C2   | Fe1  | C3   | 40.97(11)  | C26  | Fe2  | C27  | 40.71(12)  |
| C2   | Fe1  | C4   | 68.52(11)  | C26  | Fe2  | C28  | 68.58(12)  |
| C2   | Fe1  | C5   | 68.77(11)  | C26  | Fe2  | C29  | 68.72(12)  |
| C2   | Fe1  | C6   | 109.17(11) | C26  | Fe2  | C30  | 107.13(12) |
| C2   | Fe1  | C7   | 124.63(12) | C26  | Fe2  | C31  | 122.99(12) |
| C2   | Fe1  | C10  | 122.48(12) | C26  | Fe2  | C34  | 121.29(12) |
| C3   | Fe1  | C6   | 123.90(12) | C27  | Fe2  | C28  | 40.68(12)  |
| C3   | Fe1  | C7   | 108.38(12) | C27  | Fe2  | C30  | 120.80(12) |
| C4   | Fe1  | C3   | 40.44(12)  | C27  | Fe2  | C31  | 106.33(12) |
| C4   | Fe1  | C6   | 158.73(12) | C28  | Fe2  | C30  | 156.17(12) |
| C4   | Fe1  | C7   | 122.31(12) | C29  | Fe2  | C27  | 68.39(12)  |
| C5   | Fe1  | C3   | 68.51(12)  | C29  | Fe2  | C28  | 40.51(11)  |
| C5   | Fe1  | C4   | 40.69(11)  | C29  | Fe2  | C30  | 161.80(12) |
| C5   | Fe1  | C6   | 159.94(11) | C29  | Fe2  | C31  | 156.70(12) |
| C5   | Fe1  | C7   | 157.25(11) | C31  | Fe2  | C28  | 120.78(12) |
| C5   | Fe1  | C10  | 122.78(12) | C31  | Fe2  | C30  | 40.49(11)  |
| C7   | Fe1  | C6   | 40.33(11)  | C32  | Fe2  | C25  | 157.19(12) |
| C8   | Fe1  | C1   | 156.37(12) | C32  | Fe2  | C26  | 160.02(13) |
| C8   | Fe1  | C2   | 160.93(12) | C32  | Fe2  | C27  | 123.47(13) |
| C8   | Fe1  | C3   | 123.73(12) | C32  | Fe2  | C28  | 107.17(12) |
| C8   | Fe1  | C4   | 106.96(12) | C32  | Fe2  | C29  | 121.56(12) |
| C8   | Fe1  | C5   | 120.70(12) | C32  | Fe2  | C30  | 68.43(12)  |
| C8   | Fe1  | C6   | 67.92(11)  | C32  | Fe2  | C31  | 41.07(12)  |
| C8   | Fe1  | C7   | 40.90(12)  | C32  | Fe2  | C33  | 40.88(12)  |
| C8   | Fe1  | C10  | 68.37(12)  | C32  | Fe2  | C34  | 68.73(12)  |
| C9   | Fe1  | C1   | 120.76(12) | C33  | Fe2  | C25  | 121.68(12) |
| C9   | Fe1  | C2   | 157.70(12) | C33  | Fe2  | C26  | 157.37(12) |
| C9   | Fe1  | C3   | 159.17(12) | C33  | Fe2  | C27  | 160.97(12) |
| C9   | Fe1  | C4   | 122.48(12) | C33  | Fe2  | C28  | 124.81(12) |
| C9   | Fe1  | C5   | 105.99(12) | C33  | Fe2  | C29  | 108.47(12) |
| C9   | Fe1  | C6   | 67.93(11)  | C33  | Fe2  | C30  | 68.13(11)  |
| C9   | Fe1  | C7   | 68.48(13)  | C33  | Fe2  | C31  | 68.71(12)  |
| C9   | Fe1  | C8   | 40.44(13)  | C33  | Fe2  | C34  | 40.84(11)  |
| C9   | Fe1  | C10  | 40.87(12)  | C34  | Fe2  | C27  | 156.17(12) |
| C10  | Fe1  | C3   | 158.93(12) | C34  | Fe2  | C28  | 162.09(12) |
| C10  | Fe1  | C4   | 159.13(12) | C34  | Fe2  | C29  | 125.60(12) |
| C10  | Fe1  | C6   | 40.23(11)  | C34  | Fe2  | C30  | 40.20(11)  |
| C10  | Fe1  | C7   | 68.36(12)  | C34  | Fe2  | C31  | 68.36(12)  |
| C1   | P1   | C11  | 101.63(12) | C25  | P2   | C35  | 100.68(13) |

| Atom | Atom | Atom | Angle/°    | Atom | Atom | Atom | Angle/°    |
|------|------|------|------------|------|------|------|------------|
| C1   | P1   | C17  | 102.64(12) | C25  | P2   | C41  | 99.55(13)  |
| C11  | P1   | C17  | 98.98(12)  | C35  | P2   | C41  | 101.47(13) |
| C6   | N1   | C23  | 115.1(2)   | C30  | N2   | C47  | 114.9(3)   |
| C6   | N1   | C24  | 115.0(2)   | C30  | N2   | C48  | 114.8(3)   |
| C23  | N1   | C24  | 113.2(3)   | C48  | N2   | C47  | 113.3(3)   |
| P1   | C1   | Fe1  | 125.27(14) | P2   | C25  | Fe2  | 125.58(14) |
| C2   | C1   | Fe1  | 69.73(15)  | C26  | C25  | Fe2  | 69.19(16)  |
| C2   | C1   | P1   | 122.5(2)   | C26  | C25  | P2   | 125.0(2)   |
| C5   | C1   | Fe1  | 69.78(16)  | C29  | C25  | Fe2  | 69.73(16)  |
| C5   | C1   | P1   | 130.1(2)   | C29  | C25  | P2   | 128.2(2)   |
| C5   | C1   | C2   | 107.4(2)   | C29  | C25  | C26  | 106.8(3)   |
| C1   | C2   | Fe1  | 69.14(15)  | C25  | C26  | Fe2  | 69.46(16)  |
| C1   | C2   | C3   | 108.1(2)   | C27  | C26  | Fe2  | 70.04(16)  |
| C3   | C2   | Fe1  | 69.84(15)  | C27  | C26  | C25  | 108.4(3)   |
| C2   | C3   | Fe1  | 69.19(15)  | C26  | C27  | Fe2  | 69.24(16)  |
| C4   | C3   | Fe1  | 69.55(16)  | C26  | C27  | C28  | 108.2(3)   |
| C4   | C3   | C2   | 107.8(2)   | C28  | C27  | Fe2  | 70.05(16)  |
| C3   | C4   | Fe1  | 70.00(16)  | C27  | C28  | Fe2  | 69.28(16)  |
| C3   | C4   | C5   | 108.6(2)   | C29  | C28  | Fe2  | 69.33(15)  |
| C5   | C4   | Fe1  | 69.58(15)  | C29  | C28  | C27  | 107.8(3)   |
| C1   | C5   | Fe1  | 69.13(16)  | C25  | C29  | Fe2  | 69.26(15)  |
| C4   | C5   | Fe1  | 69.73(16)  | C28  | C29  | Fe2  | 70.16(16)  |
| C4   | C5   | C1   | 108.1(2)   | C28  | C29  | C25  | 108.8(3)   |
| N1   | C6   | Fe1  | 131.8(2)   | N2   | C30  | Fe2  | 130.3(2)   |
| N1   | C6   | C7   | 126.6(3)   | N2   | C30  | C31  | 127.1(3)   |
| N1   | C6   | C10  | 126.3(3)   | N2   | C30  | C34  | 125.5(3)   |
| C7   | C6   | Fe1  | 67.91(15)  | C31  | C30  | Fe2  | 68.17(16)  |
| C10  | C6   | Fe1  | 67.54(15)  | C34  | C30  | Fe2  | 68.21(16)  |
| C10  | C6   | C7   | 107.0(3)   | C34  | C30  | C31  | 107.3(3)   |
| C6   | C7   | Fe1  | 71.76(16)  | C30  | C31  | Fe2  | 71.34(16)  |
| C8   | C7   | Fe1  | 68.52(16)  | C32  | C31  | Fe2  | 68.82(16)  |
| C8   | C7   | C6   | 107.7(3)   | C32  | C31  | C30  | 108.1(3)   |
| C7   | C8   | Fe1  | 70.58(16)  | C31  | C32  | Fe2  | 70.11(16)  |
| C9   | C8   | Fe1  | 69.59(17)  | C33  | C32  | Fe2  | 69.66(16)  |
| C9   | C8   | C7   | 108.5(3)   | C33  | C32  | C31  | 107.8(3)   |
| C8   | C9   | Fe1  | 69.97(17)  | C32  | C33  | Fe2  | 69.47(17)  |
| C8   | C9   | C10  | 108.4(3)   | C32  | C33  | C34  | 108.1(3)   |
| C10  | C9   | Fe1  | 70.38(16)  | C34  | C33  | Fe2  | 70.05(16)  |
| C6   | C10  | Fe1  | 72.22(16)  | C30  | C34  | Fe2  | 71.59(16)  |
| C9   | C10  | Fe1  | 68.75(16)  | C30  | C34  | C33  | 108.6(3)   |
| C9   | C10  | C6   | 108.2(3)   | C33  | C34  | Fe2  | 69.11(16)  |
| C12  | C11  | P1   | 124.6(2)   | C36  | C35  | P2   | 118.3(2)   |
| C12  | C11  | C16  | 118.3(3)   | C36  | C35  | C40  | 118.6(3)   |
| C16  | C11  | P1   | 117.0(2)   | C40  | C35  | P2   | 123.0(2)   |
| C13  | C12  | C11  | 120.5(3)   | C37  | C36  | C35  | 120.7(3)   |
| C14  | C13  | C12  | 120.8(3)   | C38  | C37  | C36  | 120.0(3)   |
| C13  | C14  | C15  | 119.4(3)   | C39  | C38  | C37  | 119.9(3)   |



| Atom | Atom | Atom | Angle/°  | Atom | Atom | Atom | Angle/°  |
|------|------|------|----------|------|------|------|----------|
| C16  | C15  | C14  | 119.9(3) | C38  | C39  | C40  | 120.2(3) |
| C15  | C16  | C11  | 121.0(3) | C39  | C40  | C35  | 120.6(3) |
| C18  | C17  | P1   | 122.8(2) | C42  | C41  | P2   | 118.5(2) |
| C18  | C17  | C22  | 118.3(3) | C42  | C41  | C46  | 118.1(3) |
| C22  | C17  | P1   | 118.8(2) | C46  | C41  | P2   | 123.4(2) |
| C19  | C18  | C17  | 121.1(3) | C43  | C42  | C41  | 120.9(3) |
| C18  | C19  | C20  | 120.2(3) | C44  | C43  | C42  | 120.6(3) |
| C19  | C20  | C21  | 119.0(3) | C43  | C44  | C45  | 119.5(3) |
| C22  | C21  | C20  | 120.9(3) | C44  | C45  | C46  | 120.3(3) |
| C21  | C22  | C17  | 120.5(3) | C45  | C46  | C41  | 120.5(3) |

**Table S8:** Bond lengths and angles for compound **3b**

| Atom | Atom | Length/Å | Atom | Atom | Length/Å |
|------|------|----------|------|------|----------|
| Fe1  | C1   | 2.072(3) | C6   | C10  | 1.424(4) |
| Fe1  | C2   | 2.040(3) | C7   | C8   | 1.432(5) |
| Fe1  | C3   | 2.050(3) | C8   | C9   | 1.424(5) |
| Fe1  | C4   | 2.047(3) | C9   | C10  | 1.420(5) |
| Fe1  | C5   | 2.042(3) | C11  | C12  | 1.412(4) |
| Fe1  | C6   | 2.119(3) | C11  | C16  | 1.409(4) |
| Fe1  | C7   | 2.045(3) | C12  | C13  | 1.397(4) |
| Fe1  | C8   | 2.034(3) | C12  | C17  | 1.505(4) |
| Fe1  | C9   | 2.042(3) | C13  | C14  | 1.375(4) |
| Fe1  | C10  | 2.062(3) | C14  | C15  | 1.394(4) |
| P1   | C1   | 1.813(3) | C14  | C18  | 1.502(4) |
| P1   | C11  | 1.843(3) | C15  | C16  | 1.394(4) |
| P1   | C20  | 1.852(3) | C16  | C19  | 1.502(4) |
| N1   | C6   | 1.386(4) | C20  | C21  | 1.423(4) |
| N1   | C29  | 1.460(4) | C20  | C25  | 1.412(4) |
| N1   | C30  | 1.462(4) | C21  | C22  | 1.393(4) |
| C1   | C2   | 1.437(4) | C21  | C26  | 1.507(4) |
| C1   | C5   | 1.433(4) | C22  | C23  | 1.378(5) |
| C2   | C3   | 1.425(4) | C23  | C24  | 1.388(4) |
| C3   | C4   | 1.416(5) | C23  | C27  | 1.505(4) |
| C4   | C5   | 1.417(4) | C24  | C25  | 1.394(4) |
| C6   | C7   | 1.422(4) | C25  | C28  | 1.513(4) |

| Atom | Atom | Atom | Angle/°    | Atom | Atom | Atom | Angle/°   |
|------|------|------|------------|------|------|------|-----------|
| C1   | Fe1  | C6   | 132.86(12) | C3   | C2   | Fe1  | 69.98(18) |
| C2   | Fe1  | C1   | 40.90(11)  | C3   | C2   | C1   | 108.1(3)  |
| C2   | Fe1  | C3   | 40.79(12)  | C2   | C3   | Fe1  | 69.23(17) |
| C2   | Fe1  | C4   | 68.56(12)  | C4   | C3   | Fe1  | 69.65(17) |
| C2   | Fe1  | C5   | 68.68(12)  | C4   | C3   | C2   | 108.2(3)  |
| C2   | Fe1  | C6   | 108.20(12) | C3   | C4   | Fe1  | 69.90(18) |
| C2   | Fe1  | C7   | 127.32(13) | C3   | C4   | C5   | 108.1(3)  |
| C2   | Fe1  | C9   | 151.64(13) | C5   | C4   | Fe1  | 69.54(16) |
| C2   | Fe1  | C10  | 118.13(12) | C1   | C5   | Fe1  | 70.77(17) |
| C3   | Fe1  | C1   | 68.43(11)  | C4   | C5   | Fe1  | 69.91(17) |

| Atom | Atom | Atom | Angle/°    | Atom | Atom | Atom | Angle/°   |
|------|------|------|------------|------|------|------|-----------|
| C3   | Fe1  | C6   | 113.96(12) | C4   | C5   | C1   | 108.7(3)  |
| C3   | Fe1  | C10  | 147.74(13) | N1   | C6   | Fe1  | 131.9(2)  |
| C4   | Fe1  | C1   | 68.43(11)  | N1   | C6   | C7   | 126.5(3)  |
| C4   | Fe1  | C3   | 40.44(13)  | N1   | C6   | C10  | 126.5(3)  |
| C4   | Fe1  | C6   | 145.18(12) | C7   | C6   | Fe1  | 67.24(17) |
| C4   | Fe1  | C10  | 171.80(12) | C7   | C6   | C10  | 106.9(3)  |
| C5   | Fe1  | C1   | 40.75(12)  | C10  | C6   | Fe1  | 67.94(16) |
| C5   | Fe1  | C3   | 68.19(12)  | C6   | C7   | Fe1  | 72.88(17) |
| C5   | Fe1  | C4   | 40.55(11)  | C6   | C7   | C8   | 108.7(3)  |
| C5   | Fe1  | C6   | 172.92(11) | C8   | C7   | Fe1  | 69.03(17) |
| C5   | Fe1  | C7   | 147.09(12) | C7   | C8   | Fe1  | 69.86(17) |
| C5   | Fe1  | C9   | 111.82(12) | C9   | C8   | Fe1  | 69.87(18) |
| C5   | Fe1  | C10  | 135.34(11) | C9   | C8   | C7   | 107.6(3)  |
| C7   | Fe1  | C1   | 167.81(13) | C8   | C9   | Fe1  | 69.25(18) |
| C7   | Fe1  | C3   | 104.24(12) | C10  | C9   | Fe1  | 70.52(18) |
| C7   | Fe1  | C4   | 112.83(12) | C10  | C9   | C8   | 107.6(3)  |
| C7   | Fe1  | C6   | 39.87(12)  | C6   | C10  | Fe1  | 72.26(17) |
| C7   | Fe1  | C10  | 67.63(12)  | C9   | C10  | Fe1  | 69.00(18) |
| C8   | Fe1  | C1   | 151.06(13) | C9   | C10  | C6   | 109.2(3)  |
| C8   | Fe1  | C2   | 165.94(13) | C12  | C11  | P1   | 115.4(2)  |
| C8   | Fe1  | C3   | 127.14(13) | C16  | C11  | P1   | 125.5(2)  |
| C8   | Fe1  | C4   | 106.50(13) | C16  | C11  | C12  | 119.1(3)  |
| C8   | Fe1  | C5   | 116.76(13) | C11  | C12  | C17  | 122.6(3)  |
| C8   | Fe1  | C6   | 67.84(12)  | C13  | C12  | C11  | 119.2(3)  |
| C8   | Fe1  | C7   | 41.11(13)  | C13  | C12  | C17  | 118.2(3)  |
| C8   | Fe1  | C9   | 40.88(13)  | C14  | C13  | C12  | 122.5(3)  |
| C8   | Fe1  | C10  | 68.14(13)  | C13  | C14  | C15  | 117.8(3)  |
| C9   | Fe1  | C1   | 120.34(12) | C13  | C14  | C18  | 121.5(3)  |
| C9   | Fe1  | C3   | 167.49(13) | C15  | C14  | C18  | 120.7(3)  |
| C9   | Fe1  | C4   | 131.48(13) | C16  | C15  | C14  | 122.2(3)  |
| C9   | Fe1  | C6   | 67.66(12)  | C11  | C16  | C19  | 123.6(3)  |
| C9   | Fe1  | C7   | 68.62(13)  | C15  | C16  | C11  | 119.1(3)  |
| C9   | Fe1  | C10  | 40.48(13)  | C15  | C16  | C19  | 117.2(3)  |
| C10  | Fe1  | C1   | 112.99(11) | C21  | C20  | P1   | 114.5(2)  |
| C10  | Fe1  | C6   | 39.80(11)  | C25  | C20  | P1   | 127.0(2)  |
| C1   | P1   | C11  | 101.72(13) | C25  | C20  | C21  | 117.9(3)  |
| C1   | P1   | C20  | 109.10(13) | C20  | C21  | C26  | 122.4(3)  |
| C11  | P1   | C20  | 105.18(13) | C22  | C21  | C20  | 119.8(3)  |
| C6   | N1   | C29  | 115.4(3)   | C22  | C21  | C26  | 117.8(3)  |
| C6   | N1   | C30  | 116.0(2)   | C23  | C22  | C21  | 122.7(3)  |
| C29  | N1   | C30  | 112.8(3)   | C22  | C23  | C24  | 117.1(3)  |
| P1   | C1   | Fe1  | 129.47(15) | C22  | C23  | C27  | 122.0(3)  |
| C2   | C1   | Fe1  | 68.34(16)  | C24  | C23  | C27  | 120.9(3)  |
| C2   | C1   | P1   | 133.0(2)   | C23  | C24  | C25  | 123.1(3)  |
| C5   | C1   | Fe1  | 68.49(16)  | C20  | C25  | C28  | 124.8(3)  |
| C5   | C1   | P1   | 120.3(2)   | C24  | C25  | C20  | 119.4(3)  |
| C5   | C1   | C2   | 106.7(2)   | C24  | C25  | C28  | 115.8(3)  |

| Atom | Atom | Atom | Angle/°   | Atom | Atom | Atom | Angle/° |
|------|------|------|-----------|------|------|------|---------|
| C1   | C2   | Fe1  | 70.75(17) |      |      |      |         |

**Table S9:** Bond lengths and angles for compound **4a**

|     |     |           |     |     |          |
|-----|-----|-----------|-----|-----|----------|
| Se1 | P1  | 2.1076(8) | C3  | C4  | 1.427(4) |
| N1  | C6  | 1.389(4)  | C4  | C5  | 1.425(4) |
| N1  | C11 | 1.456(4)  | C6  | C7  | 1.433(4) |
| N1  | C12 | 1.459(4)  | C6  | C10 | 1.432(4) |
| Fe1 | C1  | 2.028(3)  | C7  | C8  | 1.424(5) |
| Fe1 | C2  | 2.056(3)  | C8  | C9  | 1.407(5) |
| Fe1 | C3  | 2.063(3)  | C9  | C10 | 1.427(4) |
| Fe1 | C4  | 2.051(3)  | C13 | C14 | 1.396(4) |
| Fe1 | C5  | 2.023(3)  | C13 | C18 | 1.393(4) |
| Fe1 | C6  | 2.135(3)  | C14 | C15 | 1.383(4) |
| Fe1 | C7  | 2.069(3)  | C15 | C16 | 1.385(4) |
| Fe1 | C8  | 2.023(3)  | C16 | C17 | 1.391(4) |
| Fe1 | C9  | 2.023(3)  | C17 | C18 | 1.387(4) |
| Fe1 | C10 | 2.048(3)  | C19 | C20 | 1.394(4) |
| P1  | C1  | 1.788(3)  | C19 | C24 | 1.405(4) |
| P1  | C13 | 1.816(3)  | C20 | C21 | 1.393(4) |
| P1  | C19 | 1.806(3)  | C21 | C22 | 1.391(4) |
| C1  | C2  | 1.440(4)  | C22 | C23 | 1.378(4) |
| C1  | C5  | 1.436(4)  | C23 | C24 | 1.389(4) |
| C2  | C3  | 1.417(4)  |     |     |          |

| Atom | Atom | Atom | Angle/°    | Atom | Atom | Atom | Angle/°    |
|------|------|------|------------|------|------|------|------------|
| C6   | N1   | C11  | 115.9(3)   | C19  | P1   | C13  | 104.42(12) |
| C6   | N1   | C12  | 116.7(3)   | P1   | C1   | Fe1  | 129.33(15) |
| C11  | N1   | C12  | 114.2(3)   | C2   | C1   | Fe1  | 70.41(15)  |
| C1   | Fe1  | C2   | 41.28(11)  | C2   | C1   | P1   | 125.7(2)   |
| C1   | Fe1  | C3   | 68.80(11)  | C5   | C1   | Fe1  | 69.09(15)  |
| C1   | Fe1  | C4   | 69.08(11)  | C5   | C1   | P1   | 126.6(2)   |
| C1   | Fe1  | C6   | 139.10(11) | C5   | C1   | C2   | 107.5(2)   |
| C1   | Fe1  | C7   | 178.88(12) | C1   | C2   | Fe1  | 68.32(15)  |
| C1   | Fe1  | C10  | 111.07(11) | C3   | C2   | Fe1  | 70.14(17)  |
| C2   | Fe1  | C3   | 40.25(11)  | C3   | C2   | C1   | 108.0(3)   |
| C2   | Fe1  | C6   | 113.48(11) | C2   | C3   | Fe1  | 69.61(16)  |
| C2   | Fe1  | C7   | 138.05(12) | C2   | C3   | C4   | 108.4(3)   |
| C3   | Fe1  | C6   | 114.79(12) | C4   | C3   | Fe1  | 69.28(17)  |
| C3   | Fe1  | C7   | 111.21(12) | C3   | C4   | Fe1  | 70.14(17)  |
| C4   | Fe1  | C2   | 68.34(12)  | C5   | C4   | Fe1  | 68.47(16)  |
| C4   | Fe1  | C3   | 40.58(13)  | C5   | C4   | C3   | 108.2(2)   |
| C4   | Fe1  | C6   | 141.76(12) | C1   | C5   | Fe1  | 69.40(15)  |
| C4   | Fe1  | C7   | 111.71(12) | C4   | C5   | Fe1  | 70.59(17)  |
| C5   | Fe1  | C1   | 41.51(11)  | C4   | C5   | C1   | 107.9(2)   |
| C5   | Fe1  | C2   | 69.29(12)  | N1   | C6   | Fe1  | 132.8(2)   |
| C5   | Fe1  | C3   | 68.84(12)  | N1   | C6   | C7   | 126.1(3)   |
| C5   | Fe1  | C4   | 40.94(12)  | N1   | C6   | C10  | 126.5(3)   |

| Atom | Atom | Atom | Angle/°    | Atom | Atom | Atom | Angle/°   |
|------|------|------|------------|------|------|------|-----------|
| C5   | Fe1  | C6   | 176.37(11) | C7   | C6   | Fe1  | 67.63(16) |
| C5   | Fe1  | C7   | 139.60(12) | C10  | C6   | Fe1  | 66.76(16) |
| C5   | Fe1  | C10  | 137.16(12) | C10  | C6   | C7   | 107.4(3)  |
| C7   | Fe1  | C6   | 39.80(12)  | C6   | C7   | Fe1  | 72.57(16) |
| C8   | Fe1  | C1   | 140.04(12) | C8   | C7   | Fe1  | 67.90(17) |
| C8   | Fe1  | C2   | 177.02(12) | C8   | C7   | C6   | 107.6(3)  |
| C8   | Fe1  | C3   | 136.78(13) | C7   | C8   | Fe1  | 71.40(17) |
| C8   | Fe1  | C4   | 109.22(13) | C9   | C8   | Fe1  | 69.64(17) |
| C8   | Fe1  | C5   | 110.13(13) | C9   | C8   | C7   | 108.9(3)  |
| C8   | Fe1  | C6   | 67.24(12)  | C8   | C9   | Fe1  | 69.64(18) |
| C8   | Fe1  | C7   | 40.70(13)  | C8   | C9   | C10  | 107.9(3)  |
| C8   | Fe1  | C10  | 68.51(13)  | C10  | C9   | Fe1  | 70.44(16) |
| C9   | Fe1  | C1   | 111.54(12) | C6   | C10  | Fe1  | 73.26(17) |
| C9   | Fe1  | C2   | 142.25(12) | C9   | C10  | Fe1  | 68.52(17) |
| C9   | Fe1  | C3   | 176.29(13) | C9   | C10  | C6   | 108.0(3)  |
| C9   | Fe1  | C4   | 135.81(13) | C14  | C13  | P1   | 118.5(2)  |
| C9   | Fe1  | C5   | 108.82(13) | C18  | C13  | P1   | 122.4(2)  |
| C9   | Fe1  | C6   | 67.56(12)  | C18  | C13  | C14  | 119.2(3)  |
| C9   | Fe1  | C7   | 68.52(12)  | C15  | C14  | C13  | 120.6(3)  |
| C9   | Fe1  | C8   | 40.71(13)  | C14  | C15  | C16  | 120.1(3)  |
| C9   | Fe1  | C10  | 41.03(13)  | C15  | C16  | C17  | 119.7(3)  |
| C10  | Fe1  | C2   | 114.00(12) | C18  | C17  | C16  | 120.4(3)  |
| C10  | Fe1  | C3   | 142.59(13) | C17  | C18  | C13  | 120.1(3)  |
| C10  | Fe1  | C4   | 176.82(12) | C20  | C19  | P1   | 120.4(2)  |
| C10  | Fe1  | C6   | 39.98(11)  | C20  | C19  | C24  | 119.5(2)  |
| C10  | Fe1  | C7   | 68.20(12)  | C24  | C19  | P1   | 120.0(2)  |
| C1   | P1   | Se1  | 116.28(9)  | C21  | C20  | C19  | 120.1(3)  |
| C1   | P1   | C13  | 104.87(12) | C22  | C21  | C20  | 119.8(3)  |
| C1   | P1   | C19  | 104.00(13) | C23  | C22  | C21  | 120.5(3)  |
| C13  | P1   | Se1  | 111.30(9)  | C22  | C23  | C24  | 120.2(3)  |
| C19  | P1   | Se1  | 114.79(9)  | C23  | C24  | C19  | 119.9(3)  |

**Table S10:** Bond lengths and angles for compound **7**

| Atom | Atom | Length/Å  | Atom | Atom | Length/Å |
|------|------|-----------|------|------|----------|
| Pd1  | Cl1  | 2.3599(6) | C11  | C16  | 1.413(3) |
| Pd1  | P1   | 2.3470(6) | C12  | C13  | 1.390(3) |
| Pd1  | Cl2  | 2.3461(6) | C12  | C17  | 1.511(3) |
| Pd1  | P2   | 2.2899(6) | C13  | C14  | 1.379(4) |
| Fe1  | C1   | 2.033(2)  | C14  | C15  | 1.381(4) |
| Fe1  | C2   | 2.039(2)  | C14  | C18  | 1.511(4) |
| Fe1  | C3   | 2.047(2)  | C15  | C16  | 1.391(4) |
| Fe1  | C4   | 2.043(3)  | C16  | C19  | 1.497(4) |
| Fe1  | C5   | 2.013(2)  | C20  | C21  | 1.411(3) |
| Fe1  | C6   | 1.996(2)  | C20  | C25  | 1.424(3) |
| Fe1  | C7   | 2.030(2)  | C21  | C22  | 1.394(3) |
| Fe1  | C8   | 2.066(2)  | C21  | C26  | 1.499(3) |

| Atom | Atom | Length/Å | Atom | Atom | Length/Å |
|------|------|----------|------|------|----------|
| Fe1  | C9   | 2.071(3) | C22  | C23  | 1.384(4) |
| Fe1  | C10  | 2.032(3) | C23  | C24  | 1.388(4) |
| P1   | C1   | 1.812(2) | C23  | C27  | 1.494(3) |
| P1   | C11  | 1.852(2) | C24  | C25  | 1.388(4) |
| P1   | C20  | 1.853(2) | C25  | C28  | 1.515(3) |
| C1   | C2   | 1.454(3) | C29  | C30  | 1.392(3) |
| C1   | C5   | 1.437(3) | C29  | C34  | 1.408(3) |
| P2   | C6   | 1.804(2) | C30  | C31  | 1.381(3) |
| P2   | C29  | 1.828(2) | C31  | C32  | 1.378(4) |
| P2   | C35  | 1.825(2) | C32  | C33  | 1.379(4) |
| C2   | C3   | 1.408(4) | C33  | C34  | 1.386(4) |
| C3   | C4   | 1.422(4) | C35  | C36  | 1.389(3) |
| C4   | C5   | 1.414(3) | C35  | C40  | 1.394(3) |
| C6   | C7   | 1.443(3) | C36  | C37  | 1.384(4) |
| C6   | C10  | 1.431(3) | C37  | C38  | 1.376(4) |
| C7   | C8   | 1.419(4) | C38  | C39  | 1.379(4) |
| C8   | C9   | 1.403(4) | C39  | C40  | 1.386(4) |
| C9   | C10  | 1.416(3) | Cl3  | C41  | 1.749(3) |
| C11  | C12  | 1.413(3) | Cl4  | C41  | 1.741(3) |

| Atom | Atom | Atom | Angle/°    | Atom | Atom | Atom | Angle/°    |
|------|------|------|------------|------|------|------|------------|
| P1   | Pd1  | Cl1  | 177.77(2)  | C2   | C3   | Fe1  | 69.52(14)  |
| Cl2  | Pd1  | Cl1  | 86.11(2)   | C2   | C3   | C4   | 108.4(2)   |
| Cl2  | Pd1  | P1   | 91.68(2)   | C4   | C3   | Fe1  | 69.50(14)  |
| P2   | Pd1  | Cl1  | 80.49(2)   | C3   | C4   | Fe1  | 69.81(14)  |
| P2   | Pd1  | P1   | 101.73(2)  | C5   | C4   | Fe1  | 68.46(14)  |
| P2   | Pd1  | Cl2  | 165.68(2)  | C5   | C4   | C3   | 108.4(2)   |
| C1   | Fe1  | C2   | 41.84(9)   | C1   | C5   | Fe1  | 69.96(13)  |
| C1   | Fe1  | C3   | 69.29(10)  | C4   | C5   | Fe1  | 70.76(14)  |
| C1   | Fe1  | C4   | 69.16(10)  | C4   | C5   | C1   | 108.5(2)   |
| C1   | Fe1  | C8   | 142.05(10) | P2   | C6   | Fe1  | 123.99(13) |
| C1   | Fe1  | C9   | 177.93(10) | C7   | C6   | Fe1  | 70.26(13)  |
| C2   | Fe1  | C3   | 40.32(10)  | C7   | C6   | P2   | 127.23(19) |
| C2   | Fe1  | C4   | 68.44(10)  | C10  | C6   | Fe1  | 70.54(14)  |
| C2   | Fe1  | C8   | 113.38(10) | C10  | C6   | P2   | 125.79(19) |
| C2   | Fe1  | C9   | 140.01(10) | C10  | C6   | C7   | 107.0(2)   |
| C3   | Fe1  | C8   | 111.76(10) | C6   | C7   | Fe1  | 67.75(13)  |
| C3   | Fe1  | C9   | 111.62(10) | C8   | C7   | Fe1  | 71.09(15)  |
| C4   | Fe1  | C3   | 40.69(11)  | C8   | C7   | C6   | 107.4(2)   |
| C4   | Fe1  | C8   | 137.63(10) | C7   | C8   | Fe1  | 68.39(13)  |
| C4   | Fe1  | C9   | 110.22(11) | C9   | C8   | Fe1  | 70.37(15)  |
| C5   | Fe1  | C1   | 41.59(10)  | C9   | C8   | C7   | 109.0(2)   |
| C5   | Fe1  | C2   | 69.64(10)  | C8   | C9   | Fe1  | 69.98(15)  |
| C5   | Fe1  | C3   | 69.02(10)  | C8   | C9   | C10  | 108.3(2)   |
| C5   | Fe1  | C4   | 40.78(10)  | C10  | C9   | Fe1  | 68.35(14)  |
| C5   | Fe1  | C7   | 141.04(10) | C6   | C10  | Fe1  | 67.86(13)  |
| C5   | Fe1  | C8   | 176.35(11) | C9   | C10  | Fe1  | 71.29(15)  |

| Atom | Atom | Atom | Angle/°    | Atom | Atom | Atom | Angle/°    |
|------|------|------|------------|------|------|------|------------|
| C5   | Fe1  | C9   | 136.70(11) | C9   | C10  | C6   | 108.3(2)   |
| C5   | Fe1  | C10  | 109.18(10) | C12  | C11  | P1   | 116.63(17) |
| C6   | Fe1  | C1   | 109.95(9)  | C12  | C11  | C16  | 118.3(2)   |
| C6   | Fe1  | C2   | 139.41(10) | C16  | C11  | P1   | 125.01(19) |
| C6   | Fe1  | C3   | 179.07(10) | C11  | C12  | C17  | 125.0(2)   |
| C6   | Fe1  | C4   | 138.67(10) | C13  | C12  | C11  | 119.7(2)   |
| C6   | Fe1  | C5   | 110.07(10) | C13  | C12  | C17  | 115.3(2)   |
| C6   | Fe1  | C7   | 41.99(10)  | C14  | C13  | C12  | 122.6(2)   |
| C6   | Fe1  | C8   | 69.16(10)  | C13  | C14  | C15  | 117.2(2)   |
| C6   | Fe1  | C9   | 69.12(10)  | C13  | C14  | C18  | 121.2(3)   |
| C6   | Fe1  | C10  | 41.61(10)  | C15  | C14  | C18  | 121.6(2)   |
| C7   | Fe1  | C1   | 112.51(10) | C14  | C15  | C16  | 123.1(2)   |
| C7   | Fe1  | C2   | 112.14(10) | C11  | C16  | C19  | 125.0(2)   |
| C7   | Fe1  | C3   | 138.68(10) | C15  | C16  | C11  | 119.0(2)   |
| C7   | Fe1  | C4   | 178.14(10) | C15  | C16  | C19  | 116.0(2)   |
| C7   | Fe1  | C8   | 40.52(10)  | C21  | C20  | P1   | 122.65(17) |
| C7   | Fe1  | C9   | 68.14(11)  | C21  | C20  | C25  | 118.5(2)   |
| C7   | Fe1  | C10  | 69.31(10)  | C25  | C20  | P1   | 118.75(17) |
| C8   | Fe1  | C9   | 39.65(11)  | C20  | C21  | C26  | 123.9(2)   |
| C10  | Fe1  | C1   | 137.76(10) | C22  | C21  | C20  | 119.7(2)   |
| C10  | Fe1  | C2   | 178.55(10) | C22  | C21  | C26  | 116.4(2)   |
| C10  | Fe1  | C3   | 138.65(11) | C23  | C22  | C21  | 122.3(2)   |
| C10  | Fe1  | C4   | 110.12(11) | C22  | C23  | C24  | 117.6(2)   |
| C10  | Fe1  | C8   | 67.76(10)  | C22  | C23  | C27  | 121.8(2)   |
| C10  | Fe1  | C9   | 40.36(10)  | C24  | C23  | C27  | 120.6(2)   |
| C1   | P1   | Pd1  | 111.86(8)  | C25  | C24  | C23  | 122.9(2)   |
| C1   | P1   | C11  | 111.22(11) | C20  | C25  | C28  | 126.3(2)   |
| C1   | P1   | C20  | 100.62(10) | C24  | C25  | C20  | 119.0(2)   |
| C11  | P1   | Pd1  | 109.08(7)  | C24  | C25  | C28  | 114.6(2)   |
| C11  | P1   | C20  | 101.61(11) | C30  | C29  | P2   | 122.21(18) |
| C20  | P1   | Pd1  | 121.78(8)  | C30  | C29  | C34  | 118.4(2)   |
| P1   | C1   | Fe1  | 126.62(12) | C34  | C29  | P2   | 119.09(18) |
| C2   | C1   | Fe1  | 69.29(13)  | C31  | C30  | C29  | 120.5(2)   |
| C2   | C1   | P1   | 127.03(19) | C32  | C31  | C30  | 120.6(2)   |
| C5   | C1   | Fe1  | 68.44(13)  | C31  | C32  | C33  | 120.0(2)   |
| C5   | C1   | P1   | 126.63(18) | C32  | C33  | C34  | 120.2(2)   |
| C5   | C1   | C2   | 106.3(2)   | C33  | C34  | C29  | 120.3(2)   |
| C6   | P2   | Pd1  | 124.22(8)  | C36  | C35  | P2   | 122.71(19) |
| C6   | P2   | C29  | 99.73(11)  | C36  | C35  | C40  | 119.0(2)   |
| C6   | P2   | C35  | 100.18(11) | C40  | C35  | P2   | 118.06(18) |
| C29  | P2   | Pd1  | 115.02(8)  | C37  | C36  | C35  | 119.8(2)   |
| C35  | P2   | Pd1  | 106.86(8)  | C38  | C37  | C36  | 120.8(2)   |
| C35  | P2   | C29  | 109.43(11) | C37  | C38  | C39  | 119.9(3)   |
| C1   | C2   | Fe1  | 68.87(13)  | C38  | C39  | C40  | 119.8(2)   |
| C3   | C2   | Fe1  | 70.16(14)  | C39  | C40  | C35  | 120.6(2)   |
| C3   | C2   | C1   | 108.3(2)   | Cl4  | C41  | Cl3  | 113.83(18) |

**Table S11: Bond lengths and angles for compound 8**

| Atom | Atom | Length/Å   | Atom | Atom | Length/Å |
|------|------|------------|------|------|----------|
| Pd1  | Cl1  | 2.3792(12) | C9   | C10  | 1.428(7) |
| Pd1  | P1   | 2.3167(13) | C11  | C12  | 1.414(7) |
| Pd1  | Cl2  | 2.3285(13) | C11  | C16  | 1.409(7) |
| Pd1  | P2   | 2.3518(13) | C12  | C13  | 1.403(7) |
| Fe1  | C1   | 2.023(5)   | C12  | C17  | 1.494(7) |
| Fe1  | C2   | 2.053(5)   | C13  | C14  | 1.379(8) |
| Fe1  | C3   | 2.069(5)   | C14  | C15  | 1.380(8) |
| Fe1  | C4   | 2.047(5)   | C14  | C18  | 1.508(7) |
| Fe1  | C5   | 2.007(5)   | C15  | C16  | 1.394(7) |
| Fe1  | C6   | 2.019(5)   | C16  | C19  | 1.502(8) |
| Fe1  | C7   | 2.019(5)   | C20  | C21  | 1.425(7) |
| Fe1  | C8   | 2.060(6)   | C20  | C25  | 1.422(7) |
| Fe1  | C9   | 2.063(5)   | C21  | C22  | 1.382(8) |
| Fe1  | C10  | 2.032(5)   | C21  | C26  | 1.501(7) |
| P1   | C1   | 1.835(5)   | C22  | C23  | 1.394(8) |
| P1   | C11  | 1.861(5)   | C23  | C24  | 1.361(8) |
| P1   | C20  | 1.851(5)   | C23  | C27  | 1.510(8) |
| C1   | C2   | 1.435(7)   | C24  | C25  | 1.393(8) |
| C1   | C5   | 1.419(7)   | C25  | C28  | 1.517(7) |
| P2   | C6   | 1.818(5)   | C29  | C30  | 1.529(8) |
| P2   | C29  | 1.888(5)   | C29  | C31  | 1.539(7) |
| P2   | C33  | 1.913(6)   | C29  | C32  | 1.539(7) |
| C2   | C3   | 1.424(7)   | C33  | C34  | 1.537(7) |
| C3   | C4   | 1.407(8)   | C33  | C35  | 1.552(7) |
| C4   | C5   | 1.433(7)   | C33  | C36  | 1.534(7) |
| C6   | C7   | 1.439(7)   | Cl5  | C38  | 1.752(7) |
| C6   | C10  | 1.449(7)   | Cl6  | C38  | 1.750(6) |
| C7   | C8   | 1.423(7)   | Cl3  | C37  | 1.761(6) |
| C8   | C9   | 1.413(8)   | Cl4  | C37  | 1.756(6) |

| Atom | Atom | Atom | Angle/°   | Atom | Atom | Atom | Angle/°  |
|------|------|------|-----------|------|------|------|----------|
| P1   | Pd1  | Cl1  | 81.99(5)  | C3   | C2   | C1   | 108.0(5) |
| P1   | Pd1  | Cl2  | 167.48(5) | C2   | C3   | Fe1  | 69.2(3)  |
| P1   | Pd1  | P2   | 103.37(5) | C4   | C3   | Fe1  | 69.2(3)  |
| Cl2  | Pd1  | Cl1  | 85.62(5)  | C4   | C3   | C2   | 108.4(5) |
| Cl2  | Pd1  | P2   | 88.94(5)  | C3   | C4   | Fe1  | 70.9(3)  |
| P2   | Pd1  | Cl1  | 174.17(5) | C3   | C4   | C5   | 108.1(5) |
| C1   | Fe1  | C2   | 41.2(2)   | C5   | C4   | Fe1  | 67.8(3)  |
| C1   | Fe1  | C3   | 68.8(2)   | C1   | C5   | Fe1  | 70.0(3)  |
| C1   | Fe1  | C4   | 69.2(2)   | C1   | C5   | C4   | 108.2(5) |
| C1   | Fe1  | C8   | 148.7(2)  | C4   | C5   | Fe1  | 70.8(3)  |
| C1   | Fe1  | C9   | 170.3(2)  | P2   | C6   | Fe1  | 133.1(3) |
| C1   | Fe1  | C10  | 131.1(2)  | C7   | C6   | Fe1  | 69.1(3)  |
| C2   | Fe1  | C3   | 40.4(2)   | C7   | C6   | P2   | 123.6(4) |
| C2   | Fe1  | C8   | 116.2(2)  | C7   | C6   | C10  | 106.3(4) |
| C2   | Fe1  | C9   | 147.4(2)  | C10  | C6   | Fe1  | 69.5(3)  |

| Atom | Atom | Atom | Angle/°    | Atom | Atom | Atom | Angle/°  |
|------|------|------|------------|------|------|------|----------|
| C4   | Fe1  | C2   | 68.1(2)    | C10  | C6   | P2   | 129.4(4) |
| C4   | Fe1  | C3   | 40.0(2)    | C6   | C7   | Fe1  | 69.1(3)  |
| C4   | Fe1  | C8   | 130.0(2)   | C8   | C7   | Fe1  | 71.1(3)  |
| C4   | Fe1  | C9   | 107.9(2)   | C8   | C7   | C6   | 109.0(5) |
| C5   | Fe1  | C1   | 41.2(2)    | C7   | C8   | Fe1  | 68.0(3)  |
| C5   | Fe1  | C2   | 69.0(2)    | C9   | C8   | Fe1  | 70.1(3)  |
| C5   | Fe1  | C3   | 68.6(2)    | C9   | C8   | C7   | 107.9(5) |
| C5   | Fe1  | C4   | 41.4(2)    | C8   | C9   | Fe1  | 69.9(3)  |
| C5   | Fe1  | C6   | 114.8(2)   | C8   | C9   | C10  | 108.8(5) |
| C5   | Fe1  | C7   | 148.6(2)   | C10  | C9   | Fe1  | 68.4(3)  |
| C5   | Fe1  | C8   | 169.1(2)   | C6   | C10  | Fe1  | 68.6(3)  |
| C5   | Fe1  | C9   | 130.6(2)   | C9   | C10  | Fe1  | 70.7(3)  |
| C5   | Fe1  | C10  | 107.4(2)   | C9   | C10  | C6   | 107.9(5) |
| C6   | Fe1  | C1   | 107.7(2)   | C12  | C11  | P1   | 124.6(4) |
| C6   | Fe1  | C2   | 131.6(2)   | C16  | C11  | P1   | 116.8(4) |
| C6   | Fe1  | C3   | 170.9(2)   | C16  | C11  | C12  | 118.6(4) |
| C6   | Fe1  | C4   | 147.8(2)   | C11  | C12  | C17  | 125.9(5) |
| C6   | Fe1  | C8   | 69.7(2)    | C13  | C12  | C11  | 118.4(5) |
| C6   | Fe1  | C9   | 69.5(2)    | C13  | C12  | C17  | 115.6(5) |
| C6   | Fe1  | C10  | 41.9(2)    | C14  | C13  | C12  | 122.7(5) |
| C7   | Fe1  | C1   | 116.2(2)   | C13  | C14  | C15  | 117.6(5) |
| C7   | Fe1  | C2   | 109.1(2)   | C13  | C14  | C18  | 120.4(5) |
| C7   | Fe1  | C3   | 131.3(2)   | C15  | C14  | C18  | 121.9(5) |
| C7   | Fe1  | C4   | 169.2(2)   | C14  | C15  | C16  | 122.4(5) |
| C7   | Fe1  | C6   | 41.7(2)    | C11  | C16  | C19  | 123.4(4) |
| C7   | Fe1  | C8   | 40.8(2)    | C15  | C16  | C11  | 119.2(5) |
| C7   | Fe1  | C9   | 68.4(2)    | C15  | C16  | C19  | 117.2(5) |
| C7   | Fe1  | C10  | 69.6(2)    | C21  | C20  | P1   | 118.3(4) |
| C8   | Fe1  | C3   | 108.6(2)   | C25  | C20  | P1   | 123.5(4) |
| C8   | Fe1  | C9   | 40.1(2)    | C25  | C20  | C21  | 118.0(5) |
| C9   | Fe1  | C3   | 115.4(2)   | C20  | C21  | C26  | 125.8(5) |
| C10  | Fe1  | C2   | 171.4(2)   | C22  | C21  | C20  | 119.2(5) |
| C10  | Fe1  | C3   | 146.6(2)   | C22  | C21  | C26  | 115.0(5) |
| C10  | Fe1  | C4   | 114.8(2)   | C21  | C22  | C23  | 122.8(5) |
| C10  | Fe1  | C8   | 68.7(2)    | C22  | C23  | C27  | 121.0(5) |
| C10  | Fe1  | C9   | 40.8(2)    | C24  | C23  | C22  | 117.4(5) |
| C1   | P1   | Pd1  | 120.90(17) | C24  | C23  | C27  | 121.6(5) |
| C1   | P1   | C11  | 101.9(2)   | C23  | C24  | C25  | 123.3(5) |
| C1   | P1   | C20  | 97.5(2)    | C20  | C25  | C28  | 125.0(5) |
| C11  | P1   | Pd1  | 108.18(16) | C24  | C25  | C20  | 119.1(5) |
| C20  | P1   | Pd1  | 116.54(16) | C24  | C25  | C28  | 115.7(5) |
| C20  | P1   | C11  | 110.6(2)   | C30  | C29  | P2   | 107.5(3) |
| P1   | C1   | Fe1  | 130.6(3)   | C30  | C29  | C31  | 108.4(5) |
| C2   | C1   | Fe1  | 70.5(3)    | C30  | C29  | C32  | 108.9(4) |
| C2   | C1   | P1   | 128.7(4)   | C31  | C29  | P2   | 108.9(4) |
| C5   | C1   | Fe1  | 68.8(3)    | C31  | C29  | C32  | 108.0(4) |
| C5   | C1   | P1   | 123.7(4)   | C32  | C29  | P2   | 115.0(4) |



| Atom | Atom | Atom | Angle/°    | Atom | Atom | Atom | Angle/°  |
|------|------|------|------------|------|------|------|----------|
| C5   | C1   | C2   | 107.4(4)   | C34  | C33  | P2   | 114.3(4) |
| C6   | P2   | Pd1  | 115.91(17) | C34  | C33  | C35  | 106.8(4) |
| C6   | P2   | C29  | 107.2(2)   | C35  | C33  | P2   | 110.2(4) |
| C6   | P2   | C33  | 98.4(2)    | C36  | C33  | P2   | 108.4(4) |
| C29  | P2   | Pd1  | 108.12(17) | C36  | C33  | C34  | 108.6(4) |
| C29  | P2   | C33  | 109.3(2)   | C36  | C33  | C35  | 108.3(5) |
| C33  | P2   | Pd1  | 117.20(17) | Cl6  | C38  | Cl5  | 110.3(3) |
| C1   | C2   | Fe1  | 68.3(3)    | Cl4  | C37  | Cl3  | 111.8(3) |
| C3   | C2   | Fe1  | 70.4(3)    |      |      |      |          |

**Table S12:** Bond lengths and angles for compound **9**

| Atom | Atom             | Length/Å   | Atom | Atom | Length/Å |
|------|------------------|------------|------|------|----------|
| Pd1  | Cl1 <sup>1</sup> | 2.2933(18) | C1   | C5   | 1.437(8) |
| Pd1  | Cl1              | 2.2933(18) | C2   | C3   | 1.397(8) |
| Pd1  | P1               | 2.3361(17) | C3   | C4   | 1.425(9) |
| Pd1  | P1 <sup>1</sup>  | 2.3361(17) | C4   | C5   | 1.426(8) |
| Fe1  | C1               | 2.052(6)   | C6   | C7   | 1.437(8) |
| Fe1  | C2               | 2.034(6)   | C6   | C10  | 1.432(8) |
| Fe1  | C3               | 2.044(6)   | C7   | C8   | 1.418(9) |
| Fe1  | C4               | 2.060(6)   | C8   | C9   | 1.432(9) |
| Fe1  | C5               | 2.048(6)   | C9   | C10  | 1.453(9) |
| Fe1  | C6               | 2.103(6)   | C11  | C12  | 1.387(8) |
| Fe1  | C7               | 2.055(6)   | C11  | C16  | 1.388(8) |
| Fe1  | C8               | 2.045(6)   | C12  | C13  | 1.389(8) |
| Fe1  | C9               | 2.053(6)   | C13  | C14  | 1.387(9) |
| Fe1  | C10              | 2.067(6)   | C14  | C15  | 1.373(9) |
| P1   | C1               | 1.789(6)   | C15  | C16  | 1.390(8) |
| P1   | C11              | 1.826(6)   | C17  | C18  | 1.386(8) |
| P1   | C17              | 1.829(6)   | C17  | C22  | 1.410(8) |
| N1   | C6               | 1.393(8)   | C18  | C19  | 1.381(8) |
| N1   | C23              | 1.446(8)   | C19  | C20  | 1.383(9) |
| N1   | C24              | 1.465(8)   | C20  | C21  | 1.374(9) |
| C1   | C2               | 1.445(8)   | C21  | C22  | 1.394(9) |

| Atom             | Atom | Atom            | Angle/°  | Atom | Atom | Atom | Angle/°    |
|------------------|------|-----------------|----------|------|------|------|------------|
| Cl1 <sup>1</sup> | Pd1  | Cl1             | 180.0    | C17  | P1   | Pd1  | 120.09(19) |
| Cl1 <sup>1</sup> | Pd1  | P1 <sup>1</sup> | 93.06(7) | C6   | N1   | C23  | 115.9(5)   |
| Cl1 <sup>1</sup> | Pd1  | P1              | 86.94(7) | C6   | N1   | C24  | 115.6(5)   |
| Cl1              | Pd1  | P1              | 93.06(7) | C23  | N1   | C24  | 113.5(5)   |
| Cl1              | Pd1  | P1 <sup>1</sup> | 86.94(7) | P1   | C1   | Fe1  | 131.2(3)   |
| P1               | Pd1  | P1 <sup>1</sup> | 180.0    | C2   | C1   | Fe1  | 68.6(3)    |
| C1               | Fe1  | C4              | 68.5(2)  | C2   | C1   | P1   | 126.3(4)   |
| C1               | Fe1  | C6              | 155.9(2) | C5   | C1   | Fe1  | 69.3(3)    |
| C1               | Fe1  | C7              | 163.5(2) | C5   | C1   | P1   | 126.5(5)   |
| C1               | Fe1  | C9              | 111.2(2) | C5   | C1   | C2   | 107.0(5)   |
| C1               | Fe1  | C10             | 123.2(2) | C1   | C2   | Fe1  | 70.0(3)    |
| C2               | Fe1  | C1              | 41.4(2)  | C3   | C2   | Fe1  | 70.3(3)    |

| Atom | Atom | Atom | Angle/°    | Atom | Atom | Atom | Angle/°  |
|------|------|------|------------|------|------|------|----------|
| C2   | Fe1  | C3   | 40.1(2)    | C3   | C2   | C1   | 108.2(5) |
| C2   | Fe1  | C4   | 68.3(2)    | C2   | C3   | Fe1  | 69.6(3)  |
| C2   | Fe1  | C5   | 69.2(2)    | C2   | C3   | C4   | 109.1(5) |
| C2   | Fe1  | C6   | 160.0(2)   | C4   | C3   | Fe1  | 70.3(3)  |
| C2   | Fe1  | C7   | 123.7(2)   | C3   | C4   | Fe1  | 69.0(3)  |
| C2   | Fe1  | C8   | 107.6(2)   | C3   | C4   | C5   | 107.7(5) |
| C2   | Fe1  | C9   | 122.0(2)   | C5   | C4   | Fe1  | 69.2(3)  |
| C2   | Fe1  | C10  | 158.4(2)   | C1   | C5   | Fe1  | 69.6(3)  |
| C3   | Fe1  | C1   | 68.4(2)    | C4   | C5   | Fe1  | 70.2(3)  |
| C3   | Fe1  | C4   | 40.6(2)    | C4   | C5   | C1   | 107.9(5) |
| C3   | Fe1  | C5   | 68.5(3)    | N1   | C6   | Fe1  | 131.3(4) |
| C3   | Fe1  | C6   | 123.1(2)   | N1   | C6   | C7   | 126.5(5) |
| C3   | Fe1  | C7   | 104.3(2)   | N1   | C6   | C10  | 126.1(5) |
| C3   | Fe1  | C8   | 117.6(3)   | C7   | C6   | Fe1  | 68.0(3)  |
| C3   | Fe1  | C9   | 154.1(3)   | C10  | C6   | Fe1  | 68.6(3)  |
| C3   | Fe1  | C10  | 161.0(2)   | C10  | C6   | C7   | 107.3(5) |
| C4   | Fe1  | C6   | 105.5(2)   | C6   | C7   | Fe1  | 71.6(3)  |
| C4   | Fe1  | C10  | 125.5(2)   | C8   | C7   | Fe1  | 69.4(3)  |
| C5   | Fe1  | C1   | 41.0(2)    | C8   | C7   | C6   | 108.9(5) |
| C5   | Fe1  | C4   | 40.6(2)    | C7   | C8   | Fe1  | 70.1(3)  |
| C5   | Fe1  | C6   | 119.3(2)   | C7   | C8   | C9   | 108.3(5) |
| C5   | Fe1  | C7   | 151.8(2)   | C9   | C8   | Fe1  | 69.9(3)  |
| C5   | Fe1  | C9   | 129.4(3)   | C8   | C9   | Fe1  | 69.2(3)  |
| C5   | Fe1  | C10  | 109.4(2)   | C8   | C9   | C10  | 107.3(5) |
| C7   | Fe1  | C4   | 116.3(2)   | C10  | C9   | Fe1  | 69.9(3)  |
| C7   | Fe1  | C6   | 40.4(2)    | C6   | C10  | Fe1  | 71.3(3)  |
| C7   | Fe1  | C10  | 68.2(2)    | C6   | C10  | C9   | 108.0(5) |
| C8   | Fe1  | C1   | 128.4(2)   | C9   | C10  | Fe1  | 68.8(3)  |
| C8   | Fe1  | C4   | 151.0(3)   | C12  | C11  | P1   | 118.3(4) |
| C8   | Fe1  | C5   | 167.1(2)   | C12  | C11  | C16  | 120.3(5) |
| C8   | Fe1  | C6   | 68.1(2)    | C16  | C11  | P1   | 121.5(4) |
| C8   | Fe1  | C7   | 40.5(2)    | C11  | C12  | C13  | 119.8(6) |
| C8   | Fe1  | C9   | 40.9(3)    | C14  | C13  | C12  | 119.6(6) |
| C8   | Fe1  | C10  | 68.8(2)    | C15  | C14  | C13  | 120.7(6) |
| C9   | Fe1  | C4   | 165.1(3)   | C14  | C15  | C16  | 120.0(6) |
| C9   | Fe1  | C6   | 68.3(2)    | C11  | C16  | C15  | 119.6(5) |
| C9   | Fe1  | C7   | 68.5(2)    | C18  | C17  | P1   | 120.8(5) |
| C9   | Fe1  | C10  | 41.3(2)    | C18  | C17  | C22  | 117.9(6) |
| C10  | Fe1  | C6   | 40.2(2)    | C22  | C17  | P1   | 121.2(5) |
| C1   | P1   | Pd1  | 111.7(2)   | C19  | C18  | C17  | 121.1(6) |
| C1   | P1   | C11  | 105.8(3)   | C18  | C19  | C20  | 120.4(6) |
| C1   | P1   | C17  | 104.9(3)   | C21  | C20  | C19  | 120.0(6) |
| C11  | P1   | Pd1  | 109.95(19) | C20  | C21  | C22  | 120.0(6) |
| C11  | P1   | C17  | 103.3(3)   | C21  | C22  | C17  | 120.6(6) |

**Table S13: Bond lengths and angles for compound 10**

| Atom | Atom | Length/Å   | Atom | Atom | Length/Å   |
|------|------|------------|------|------|------------|
| Cl1  | Pd1  | 2.3278(13) | Fe2  | C42  | 2.110(5)   |
| P1   | Pd1  | 2.3404(14) | Fe2  | C43  | 2.071(5)   |
| P1   | C1   | 1.785(5)   | Fe2  | C44  | 2.092(5)   |
| P1   | C11  | 1.829(5)   | Fe2  | C45  | 2.074(5)   |
| P1   | C20  | 1.828(5)   | Fe2  | C46  | 2.077(5)   |
| Fe1  | Pd1  | 2.8369(10) | Cl2  | Pd2  | 2.3278(13) |
| Fe1  | C1   | 2.133(5)   | Pd2  | P3   | 2.3289(15) |
| Fe1  | C2   | 2.079(5)   | Pd2  | P4   | 2.2931(15) |
| Fe1  | C3   | 2.054(5)   | P3   | C37  | 1.790(5)   |
| Fe1  | C4   | 2.074(5)   | P3   | C47  | 1.828(5)   |
| Fe1  | C5   | 2.088(5)   | P3   | C56  | 1.832(5)   |
| Fe1  | C6   | 2.109(5)   | P4   | C42  | 1.797(5)   |
| Fe1  | C7   | 2.067(5)   | P4   | C65  | 1.887(5)   |
| Fe1  | C8   | 2.071(6)   | P4   | C69  | 1.873(5)   |
| Fe1  | C9   | 2.077(6)   | C37  | C38  | 1.414(7)   |
| Fe1  | C10  | 2.084(6)   | C37  | C41  | 1.459(7)   |
| Pd1  | P2   | 2.2751(16) | C38  | C39  | 1.416(7)   |
| C1   | C2   | 1.407(7)   | C39  | C40  | 1.430(7)   |
| C1   | C5   | 1.457(7)   | C40  | C41  | 1.410(7)   |
| C2   | C3   | 1.424(7)   | C42  | C43  | 1.460(7)   |
| P2   | C6   | 1.792(5)   | C42  | C46  | 1.423(7)   |
| P2   | C29  | 1.888(6)   | C43  | C44  | 1.398(7)   |
| P2   | C33  | 1.868(6)   | C44  | C45  | 1.419(7)   |
| C3   | C4   | 1.418(8)   | C45  | C46  | 1.417(7)   |
| C4   | C5   | 1.396(7)   | C47  | C48  | 1.415(7)   |
| C6   | C7   | 1.459(7)   | C47  | C52  | 1.416(6)   |
| C6   | C10  | 1.416(7)   | C48  | C49  | 1.397(7)   |
| C7   | C8   | 1.415(8)   | C48  | C53  | 1.503(7)   |
| C8   | C9   | 1.391(9)   | C49  | C50  | 1.377(7)   |
| C9   | C10  | 1.393(9)   | C50  | C51  | 1.379(7)   |
| C11  | C12  | 1.417(7)   | C50  | C54  | 1.512(7)   |
| C11  | C16  | 1.411(7)   | C51  | C52  | 1.389(7)   |
| C12  | C13  | 1.392(7)   | C52  | C55  | 1.506(7)   |
| C12  | C17  | 1.502(6)   | C56  | C57  | 1.421(7)   |
| C13  | C14  | 1.392(7)   | C56  | C61  | 1.418(7)   |
| C14  | C15  | 1.384(7)   | C57  | C58  | 1.392(7)   |
| C14  | C18  | 1.503(7)   | C57  | C62  | 1.511(7)   |
| C15  | C16  | 1.386(7)   | C58  | C59  | 1.387(7)   |
| C16  | C19  | 1.516(7)   | C59  | C60  | 1.385(7)   |
| C20  | C21  | 1.411(7)   | C59  | C63  | 1.518(7)   |
| C20  | C25  | 1.424(7)   | C60  | C61  | 1.394(7)   |
| C21  | C22  | 1.387(7)   | C61  | C64  | 1.505(7)   |
| C21  | C26  | 1.521(7)   | C65  | C66  | 1.533(7)   |
| C22  | C23  | 1.390(8)   | C65  | C67  | 1.534(7)   |
| C23  | C24  | 1.385(8)   | C65  | C68  | 1.542(7)   |
| C23  | C27  | 1.512(7)   | C69  | C70  | 1.537(7)   |
| C24  | C25  | 1.390(7)   | C69  | C71  | 1.556(7)   |
| C25  | C28  | 1.505(7)   | C69  | C72  | 1.535(7)   |
| C29  | C30  | 1.541(9)   | Sb2  | F7   | 1.861(3)   |
| C29  | C31  | 1.528(8)   | Sb2  | F8   | 1.871(3)   |
| C29  | C32  | 1.533(9)   | Sb2  | F9   | 1.876(3)   |
| C33  | C34  | 1.547(8)   | Sb2  | F10  | 1.874(3)   |
| C33  | C35  | 1.564(9)   | Sb2  | F11  | 1.869(3)   |
| C33  | C36  | 1.505(9)   | Sb2  | F12  | 1.873(3)   |

| Atom | Atom | Length/Å   | Atom | Atom | Length/Å |
|------|------|------------|------|------|----------|
| Fe2  | Pd2  | 2.7974(10) | F1   | Sb1  | 1.861(3) |
| Fe2  | C37  | 2.128(5)   | Sb1  | F2   | 1.870(3) |
| Fe2  | C38  | 2.076(5)   | Sb1  | F3   | 1.868(3) |
| Fe2  | C39  | 2.056(5)   | Sb1  | F4   | 1.878(4) |
| Fe2  | C40  | 2.079(5)   | Sb1  | F5   | 1.871(3) |
| Fe2  | C41  | 2.093(5)   | Sb1  | F6   | 1.869(3) |

| Atom | Atom | Atom | Angle/°    | Atom | Atom | Atom | Angle/°    |
|------|------|------|------------|------|------|------|------------|
| C1   | P1   | Pd1  | 82.94(17)  | C39  | Fe2  | C44  | 101.5(2)   |
| C1   | P1   | C11  | 105.0(2)   | C39  | Fe2  | C45  | 90.4(2)    |
| C1   | P1   | C20  | 111.3(2)   | C39  | Fe2  | C46  | 116.5(2)   |
| C11  | P1   | Pd1  | 120.16(16) | C40  | Fe2  | Pd2  | 113.05(14) |
| C20  | P1   | Pd1  | 118.34(17) | C40  | Fe2  | C37  | 66.88(18)  |
| C20  | P1   | C11  | 113.2(2)   | C40  | Fe2  | C41  | 39.52(18)  |
| C1   | Fe1  | Pd1  | 65.80(14)  | C40  | Fe2  | C42  | 132.21(19) |
| C2   | Fe1  | Pd1  | 99.46(14)  | C40  | Fe2  | C44  | 132.2(2)   |
| C2   | Fe1  | C1   | 39.00(19)  | C41  | Fe2  | Pd2  | 74.39(14)  |
| C2   | Fe1  | C5   | 67.2(2)    | C41  | Fe2  | C37  | 40.45(18)  |
| C2   | Fe1  | C6   | 157.5(2)   | C41  | Fe2  | C42  | 123.87(19) |
| C2   | Fe1  | C10  | 157.4(2)   | C42  | Fe2  | Pd2  | 69.06(13)  |
| C3   | Fe1  | Pd1  | 131.71(15) | C42  | Fe2  | C37  | 136.91(18) |
| C3   | Fe1  | C1   | 66.3(2)    | C43  | Fe2  | Pd2  | 76.36(14)  |
| C3   | Fe1  | C2   | 40.3(2)    | C43  | Fe2  | C37  | 126.09(19) |
| C3   | Fe1  | C4   | 40.2(2)    | C43  | Fe2  | C38  | 120.7(2)   |
| C3   | Fe1  | C5   | 66.8(2)    | C43  | Fe2  | C40  | 167.0(2)   |
| C3   | Fe1  | C6   | 157.5(2)   | C43  | Fe2  | C41  | 150.7(2)   |
| C3   | Fe1  | C7   | 136.8(2)   | C43  | Fe2  | C42  | 40.86(18)  |
| C3   | Fe1  | C8   | 100.0(2)   | C43  | Fe2  | C44  | 39.26(19)  |
| C3   | Fe1  | C9   | 91.9(2)    | C43  | Fe2  | C45  | 66.7(2)    |
| C3   | Fe1  | C10  | 119.1(2)   | C43  | Fe2  | C46  | 67.4(2)    |
| C4   | Fe1  | Pd1  | 111.99(15) | C44  | Fe2  | Pd2  | 114.74(14) |
| C4   | Fe1  | C1   | 66.5(2)    | C44  | Fe2  | C37  | 134.62(19) |
| C4   | Fe1  | C2   | 67.5(2)    | C44  | Fe2  | C41  | 168.6(2)   |
| C4   | Fe1  | C5   | 39.20(19)  | C44  | Fe2  | C42  | 67.21(19)  |
| C4   | Fe1  | C6   | 134.5(2)   | C45  | Fe2  | Pd2  | 135.60(15) |
| C4   | Fe1  | C9   | 100.0(2)   | C45  | Fe2  | C37  | 155.8(2)   |
| C4   | Fe1  | C10  | 102.3(2)   | C45  | Fe2  | C38  | 117.5(2)   |
| C5   | Fe1  | Pd1  | 73.36(14)  | C45  | Fe2  | C40  | 100.8(2)   |
| C5   | Fe1  | C1   | 40.36(19)  | C45  | Fe2  | C41  | 138.0(2)   |
| C5   | Fe1  | C6   | 124.8(2)   | C45  | Fe2  | C42  | 67.0(2)    |
| C6   | Fe1  | Pd1  | 70.00(14)  | C45  | Fe2  | C44  | 39.84(19)  |
| C6   | Fe1  | C1   | 135.80(19) | C45  | Fe2  | C46  | 39.9(2)    |
| C7   | Fe1  | Pd1  | 79.28(16)  | C46  | Fe2  | Pd2  | 103.60(14) |
| C7   | Fe1  | C1   | 126.3(2)   | C46  | Fe2  | C37  | 158.3(2)   |
| C7   | Fe1  | C2   | 119.1(2)   | C46  | Fe2  | C40  | 100.9(2)   |
| C7   | Fe1  | C4   | 166.6(2)   | C46  | Fe2  | C41  | 118.9(2)   |
| C7   | Fe1  | C5   | 152.6(2)   | C46  | Fe2  | C42  | 39.73(18)  |
| C7   | Fe1  | C6   | 40.9(2)    | C46  | Fe2  | C44  | 67.0(2)    |
| C7   | Fe1  | C8   | 40.0(2)    | Cl2  | Pd2  | Fe2  | 166.94(4)  |
| C7   | Fe1  | C9   | 66.7(3)    | Cl2  | Pd2  | P3   | 100.02(5)  |
| C7   | Fe1  | C10  | 67.1(2)    | P3   | Pd2  | Fe2  | 80.83(4)   |
| C8   | Fe1  | Pd1  | 118.77(19) | P4   | Pd2  | Fe2  | 80.66(4)   |
| C8   | Fe1  | C1   | 136.8(2)   | P4   | Pd2  | Cl2  | 98.26(5)   |
| C8   | Fe1  | C2   | 103.8(2)   | P4   | Pd2  | P3   | 161.46(5)  |
| C8   | Fe1  | C4   | 129.2(2)   | C37  | P3   | Pd2  | 84.75(16)  |

| Atom | Atom | Atom | Angle/°    | Atom | Atom | Atom | Angle/°    |
|------|------|------|------------|------|------|------|------------|
| C8   | Fe1  | C5   | 166.8(2)   | C37  | P3   | C47  | 115.3(2)   |
| C8   | Fe1  | C6   | 67.2(2)    | C37  | P3   | C56  | 104.2(2)   |
| C8   | Fe1  | C9   | 39.2(3)    | C47  | P3   | Pd2  | 117.18(16) |
| C8   | Fe1  | C10  | 66.1(3)    | C47  | P3   | C56  | 108.7(2)   |
| C9   | Fe1  | Pd1  | 136.29(17) | C56  | P3   | Pd2  | 123.59(16) |
| C9   | Fe1  | C1   | 157.8(2)   | C42  | P4   | Pd2  | 87.02(16)  |
| C9   | Fe1  | C2   | 120.5(2)   | C42  | P4   | C65  | 109.6(2)   |
| C9   | Fe1  | C5   | 136.0(2)   | C42  | P4   | C69  | 109.7(2)   |
| C9   | Fe1  | C6   | 66.3(2)    | C65  | P4   | Pd2  | 117.66(16) |
| C9   | Fe1  | C10  | 39.1(2)    | C69  | P4   | Pd2  | 117.96(16) |
| C10  | Fe1  | Pd1  | 103.10(16) | C69  | P4   | C65  | 111.7(2)   |
| C10  | Fe1  | C1   | 156.9(2)   | P3   | C37  | Fe2  | 116.8(2)   |
| C10  | Fe1  | C5   | 118.4(2)   | C38  | C37  | Fe2  | 68.4(3)    |
| C10  | Fe1  | C6   | 39.5(2)    | C38  | C37  | P3   | 127.0(4)   |
| Cl1  | Pd1  | P1   | 102.25(5)  | C38  | C37  | C41  | 107.2(4)   |
| Cl1  | Pd1  | Fe1  | 166.91(4)  | C41  | C37  | Fe2  | 68.5(3)    |
| P1   | Pd1  | Fe1  | 82.29(4)   | C41  | C37  | P3   | 124.2(4)   |
| P2   | Pd1  | Cl1  | 96.02(5)   | C37  | C38  | Fe2  | 72.3(3)    |
| P2   | Pd1  | P1   | 161.60(5)  | C37  | C38  | C39  | 108.6(5)   |
| P2   | Pd1  | Fe1  | 79.39(4)   | C39  | C38  | Fe2  | 69.2(3)    |
| P1   | C1   | Fe1  | 121.7(3)   | C38  | C39  | Fe2  | 70.7(3)    |
| C2   | C1   | P1   | 128.7(4)   | C38  | C39  | C40  | 108.4(5)   |
| C2   | C1   | Fe1  | 68.4(3)    | C40  | C39  | Fe2  | 70.6(3)    |
| C2   | C1   | C5   | 107.3(4)   | C39  | C40  | Fe2  | 68.9(3)    |
| C5   | C1   | P1   | 123.4(4)   | C41  | C40  | Fe2  | 70.8(3)    |
| C5   | C1   | Fe1  | 68.1(3)    | C41  | C40  | C39  | 108.0(4)   |
| C1   | C2   | Fe1  | 72.6(3)    | C37  | C41  | Fe2  | 71.1(3)    |
| C1   | C2   | C3   | 107.9(5)   | C40  | C41  | Fe2  | 69.7(3)    |
| C3   | C2   | Fe1  | 68.9(3)    | C40  | C41  | C37  | 107.8(4)   |
| C6   | P2   | Pd1  | 90.11(17)  | P4   | C42  | Fe2  | 116.0(2)   |
| C6   | P2   | C29  | 108.6(3)   | C43  | C42  | Fe2  | 68.1(3)    |
| C6   | P2   | C33  | 110.3(3)   | C43  | C42  | P4   | 122.0(4)   |
| C29  | P2   | Pd1  | 117.84(19) | C46  | C42  | Fe2  | 68.9(3)    |
| C33  | P2   | Pd1  | 115.7(2)   | C46  | C42  | P4   | 130.4(4)   |
| C33  | P2   | C29  | 111.8(3)   | C46  | C42  | C43  | 105.8(4)   |
| C2   | C3   | Fe1  | 70.8(3)    | C42  | C43  | Fe2  | 71.0(3)    |
| C4   | C3   | Fe1  | 70.7(3)    | C44  | C43  | Fe2  | 71.2(3)    |
| C4   | C3   | C2   | 108.5(5)   | C44  | C43  | C42  | 108.9(4)   |
| C3   | C4   | Fe1  | 69.1(3)    | C43  | C44  | Fe2  | 69.6(3)    |
| C5   | C4   | Fe1  | 71.0(3)    | C43  | C44  | C45  | 107.9(5)   |
| C5   | C4   | C3   | 108.2(5)   | C45  | C44  | Fe2  | 69.4(3)    |
| C1   | C5   | Fe1  | 71.5(3)    | C44  | C45  | Fe2  | 70.7(3)    |
| C4   | C5   | Fe1  | 69.8(3)    | C46  | C45  | Fe2  | 70.1(3)    |
| C4   | C5   | C1   | 107.9(5)   | C46  | C45  | C44  | 108.5(5)   |
| P2   | C6   | Fe1  | 114.9(3)   | C42  | C46  | Fe2  | 71.4(3)    |
| C7   | C6   | Fe1  | 68.0(3)    | C45  | C46  | Fe2  | 70.0(3)    |
| C7   | C6   | P2   | 122.2(4)   | C45  | C46  | C42  | 108.8(4)   |
| C10  | C6   | Fe1  | 69.3(3)    | C48  | C47  | P3   | 125.8(4)   |
| C10  | C6   | P2   | 130.0(4)   | C48  | C47  | C52  | 119.5(4)   |
| C10  | C6   | C7   | 105.9(5)   | C52  | C47  | P3   | 114.6(3)   |
| C6   | C7   | Fe1  | 71.1(3)    | C47  | C48  | C53  | 125.6(4)   |
| C8   | C7   | Fe1  | 70.2(3)    | C49  | C48  | C47  | 117.7(5)   |
| C8   | C7   | C6   | 107.3(5)   | C49  | C48  | C53  | 116.7(4)   |
| C7   | C8   | Fe1  | 69.8(3)    | C50  | C49  | C48  | 123.5(5)   |
| C9   | C8   | Fe1  | 70.7(4)    | C49  | C50  | C51  | 117.7(5)   |

| Atom | Atom | Atom | Angle/°    | Atom | Atom | Atom | Angle/°    |
|------|------|------|------------|------|------|------|------------|
| C9   | C8   | C7   | 108.6(5)   | C49  | C50  | C54  | 121.3(5)   |
| C8   | C9   | Fe1  | 70.2(3)    | C51  | C50  | C54  | 121.1(5)   |
| C8   | C9   | C10  | 109.0(5)   | C50  | C51  | C52  | 122.4(5)   |
| C10  | C9   | Fe1  | 70.7(3)    | C47  | C52  | C55  | 122.2(4)   |
| C6   | C10  | Fe1  | 71.2(3)    | C51  | C52  | C47  | 119.1(4)   |
| C9   | C10  | Fe1  | 70.2(3)    | C51  | C52  | C55  | 118.7(4)   |
| C9   | C10  | C6   | 109.3(6)   | C57  | C56  | P3   | 120.5(4)   |
| C12  | C11  | P1   | 118.9(4)   | C61  | C56  | P3   | 120.4(4)   |
| C16  | C11  | P1   | 121.7(4)   | C61  | C56  | C57  | 119.2(5)   |
| C16  | C11  | C12  | 119.3(4)   | C56  | C57  | C62  | 123.8(4)   |
| C11  | C12  | C17  | 125.4(4)   | C58  | C57  | C56  | 118.9(4)   |
| C13  | C12  | C11  | 118.8(4)   | C58  | C57  | C62  | 117.3(4)   |
| C13  | C12  | C17  | 115.8(4)   | C59  | C58  | C57  | 122.7(5)   |
| C14  | C13  | C12  | 122.3(5)   | C58  | C59  | C63  | 121.6(5)   |
| C13  | C14  | C18  | 120.2(5)   | C60  | C59  | C58  | 117.7(5)   |
| C15  | C14  | C13  | 117.6(5)   | C60  | C59  | C63  | 120.7(5)   |
| C15  | C14  | C18  | 122.2(5)   | C59  | C60  | C61  | 122.7(5)   |
| C14  | C15  | C16  | 122.7(5)   | C56  | C61  | C64  | 124.1(5)   |
| C11  | C16  | C19  | 123.2(4)   | C60  | C61  | C56  | 118.8(5)   |
| C15  | C16  | C11  | 119.1(4)   | C60  | C61  | C64  | 117.0(4)   |
| C15  | C16  | C19  | 117.7(4)   | C66  | C65  | P4   | 108.4(3)   |
| C21  | C20  | P1   | 126.0(4)   | C66  | C65  | C67  | 107.8(4)   |
| C21  | C20  | C25  | 118.8(5)   | C66  | C65  | C68  | 109.4(4)   |
| C25  | C20  | P1   | 114.6(4)   | C67  | C65  | P4   | 108.8(3)   |
| C20  | C21  | C26  | 125.8(5)   | C67  | C65  | C68  | 110.0(4)   |
| C22  | C21  | C20  | 118.3(5)   | C68  | C65  | P4   | 112.3(3)   |
| C22  | C21  | C26  | 115.8(5)   | C70  | C69  | P4   | 115.8(3)   |
| C21  | C22  | C23  | 123.3(5)   | C70  | C69  | C71  | 109.5(4)   |
| C22  | C23  | C27  | 121.0(5)   | C71  | C69  | P4   | 107.0(3)   |
| C24  | C23  | C22  | 117.9(5)   | C72  | C69  | P4   | 108.6(3)   |
| C24  | C23  | C27  | 121.1(5)   | C72  | C69  | C70  | 108.7(4)   |
| C23  | C24  | C25  | 121.3(5)   | C72  | C69  | C71  | 106.8(4)   |
| C20  | C25  | C28  | 121.1(5)   | F7   | Sb2  | F8   | 179.46(17) |
| C24  | C25  | C20  | 119.9(5)   | F7   | Sb2  | F9   | 90.77(18)  |
| C24  | C25  | C28  | 118.9(5)   | F7   | Sb2  | F10  | 90.88(18)  |
| C30  | C29  | P2   | 110.4(4)   | F7   | Sb2  | F11  | 89.13(19)  |
| C31  | C29  | P2   | 114.3(5)   | F7   | Sb2  | F12  | 90.43(17)  |
| C31  | C29  | C30  | 104.7(5)   | F8   | Sb2  | F9   | 88.80(17)  |
| C31  | C29  | C32  | 111.5(6)   | F8   | Sb2  | F10  | 89.53(17)  |
| C32  | C29  | P2   | 111.9(4)   | F8   | Sb2  | F12  | 89.24(16)  |
| C32  | C29  | C30  | 103.2(6)   | F10  | Sb2  | F9   | 177.97(16) |
| C34  | C33  | P2   | 114.1(4)   | F11  | Sb2  | F8   | 91.21(18)  |
| C34  | C33  | C35  | 107.1(5)   | F11  | Sb2  | F9   | 90.49(16)  |
| C35  | C33  | P2   | 107.7(4)   | F11  | Sb2  | F10  | 90.70(16)  |
| C36  | C33  | P2   | 107.7(4)   | F11  | Sb2  | F12  | 179.55(19) |
| C36  | C33  | C34  | 110.5(5)   | F12  | Sb2  | F9   | 89.46(15)  |
| C36  | C33  | C35  | 109.8(6)   | F12  | Sb2  | F10  | 89.36(16)  |
| C37  | Fe2  | Pd2  | 67.86(13)  | F1   | Sb1  | F2   | 179.23(19) |
| C38  | Fe2  | Pd2  | 102.03(14) | F1   | Sb1  | F3   | 91.52(19)  |
| C38  | Fe2  | C37  | 39.28(18)  | F1   | Sb1  | F4   | 90.56(19)  |
| C38  | Fe2  | C40  | 67.5(2)    | F1   | Sb1  | F5   | 89.48(17)  |
| C38  | Fe2  | C41  | 67.4(2)    | F1   | Sb1  | F6   | 90.25(16)  |
| C38  | Fe2  | C42  | 160.02(19) | F2   | Sb1  | F4   | 88.72(19)  |
| C38  | Fe2  | C44  | 103.0(2)   | F2   | Sb1  | F5   | 90.28(16)  |
| C38  | Fe2  | C46  | 154.3(2)   | F3   | Sb1  | F2   | 89.21(18)  |

| Atom | Atom | Atom | Angle/°    | Atom | Atom | Atom | Angle/°    |
|------|------|------|------------|------|------|------|------------|
| C39  | Fe2  | Pd2  | 134.03(14) | F3   | Sb1  | F4   | 177.74(19) |
| C39  | Fe2  | C37  | 66.61(19)  | F3   | Sb1  | F5   | 89.79(17)  |
| C39  | Fe2  | C38  | 40.06(19)  | F3   | Sb1  | F6   | 89.26(15)  |
| C39  | Fe2  | C40  | 40.5(2)    | F5   | Sb1  | F4   | 91.11(18)  |
| C39  | Fe2  | C41  | 67.2(2)    | F6   | Sb1  | F2   | 90.00(16)  |
| C39  | Fe2  | C42  | 155.63(19) | F6   | Sb1  | F4   | 89.84(17)  |
| C39  | Fe2  | C43  | 138.7(2)   | F6   | Sb1  | F5   | 179.01(17) |

**Table S14:** Bond lengths and angles for compound **11**

| Atom | Atom | Length/Å   | Atom | Atom | Length/Å  |
|------|------|------------|------|------|-----------|
| P1   | Pd1  | 2.190(3)   | C4   | C5   | 1.433(14) |
| P1   | C1   | 1.783(11)  | C6   | C7   | 1.431(15) |
| P1   | C11  | 1.798(10)  | C6   | C10  | 1.451(14) |
| P1   | C17  | 1.803(10)  | C7   | C8   | 1.425(17) |
| Pd1  | Cl1  | 2.315(3)   | C8   | C9   | 1.412(17) |
| Pd1  | Fe1  | 2.7384(18) | C9   | C10  | 1.407(16) |
| Pd1  | N1   | 2.118(8)   | C11  | C12  | 1.396(14) |
| Pd1  | C6   | 2.459(10)  | C11  | C16  | 1.420(14) |
| Fe1  | C1   | 2.124(10)  | C12  | C13  | 1.384(14) |
| Fe1  | C2   | 2.100(10)  | C13  | C14  | 1.414(16) |
| Fe1  | C3   | 2.062(11)  | C14  | C15  | 1.365(16) |
| Fe1  | C4   | 2.067(10)  | C15  | C16  | 1.363(16) |
| Fe1  | C5   | 2.072(10)  | C17  | C18  | 1.400(13) |
| Fe1  | C6   | 2.169(10)  | C17  | C22  | 1.387(14) |
| Fe1  | C7   | 2.117(11)  | C18  | C19  | 1.411(14) |
| Fe1  | C8   | 2.052(11)  | C19  | C20  | 1.361(16) |
| Fe1  | C9   | 2.040(11)  | C20  | C21  | 1.387(15) |
| Fe1  | C10  | 2.086(10)  | C21  | C22  | 1.418(14) |
| N1   | C6   | 1.394(15)  | F1   | Sb1  | 1.868(6)  |
| N1   | C23  | 1.510(13)  | Sb1  | F2   | 1.882(6)  |
| N1   | C24  | 1.506(14)  | Sb1  | F3   | 1.878(6)  |
| C1   | C2   | 1.423(14)  | Sb1  | F4   | 1.870(6)  |
| C1   | C5   | 1.424(14)  | Sb1  | F5   | 1.874(7)  |
| C2   | C3   | 1.417(16)  | Sb1  | F6   | 1.884(6)  |
| C3   | C4   | 1.403(15)  |      |      |           |

| Atom | Atom | Atom | Angle/°   | Atom | Atom | Atom | Angle/°   |
|------|------|------|-----------|------|------|------|-----------|
| C1   | P1   | Pd1  | 92.6(3)   | C23  | N1   | Pd1  | 115.9(6)  |
| C1   | P1   | C11  | 108.8(5)  | C24  | N1   | Pd1  | 108.8(6)  |
| C1   | P1   | C17  | 108.3(5)  | C24  | N1   | C23  | 109.1(8)  |
| C11  | P1   | Pd1  | 113.5(3)  | P1   | C1   | Fe1  | 113.4(6)  |
| C11  | P1   | C17  | 108.9(4)  | C2   | C1   | P1   | 126.5(7)  |
| C17  | P1   | Pd1  | 122.8(3)  | C2   | C1   | Fe1  | 69.4(6)   |
| P1   | Pd1  | Cl1  | 98.15(10) | C2   | C1   | C5   | 108.8(9)  |
| P1   | Pd1  | Fe1  | 82.35(8)  | C5   | C1   | P1   | 121.9(7)  |
| P1   | Pd1  | C6   | 131.1(3)  | C5   | C1   | Fe1  | 68.2(5)   |
| Cl1  | Pd1  | Fe1  | 176.03(8) | C1   | C2   | Fe1  | 71.2(6)   |
| Cl1  | Pd1  | C6   | 130.8(3)  | C3   | C2   | Fe1  | 68.7(6)   |
| N1   | Pd1  | P1   | 163.9(2)  | C3   | C2   | C1   | 106.6(9)  |
| N1   | Pd1  | Cl1  | 96.6(3)   | C2   | C3   | Fe1  | 71.5(6)   |
| N1   | Pd1  | Fe1  | 83.4(3)   | C4   | C3   | Fe1  | 70.3(6)   |
| N1   | Pd1  | C6   | 34.5(4)   | C4   | C3   | C2   | 109.8(10) |

| Atom | Atom | Atom | Angle/°      | Atom | Atom | Atom      | Angle/°   |
|------|------|------|--------------|------|------|-----------|-----------|
| C6   | Pd1  | Fe1  | 49.0(3)      | C3   | C4   | Fe1       | 70.0(6)   |
| C1   | Fe1  | Pd1  | 71.6(3)      | C3   | C4   | C5        | 107.6(9)  |
| C1   | Fe1  | C6   | 130.2(4) C5  | C4   | Fe1  | 69.9(6)   |           |
| C2   | Fe1  | Pd1  | 95.4(3)      | C1   | C5   | Fe1       | 72.2(6)   |
| C2   | Fe1  | C1   | 39.4(4)      | C1   | C5   | C4        | 107.1(9)  |
| C2   | Fe1  | C6   | 137.8(4) C4  | C5   | Fe1  | 69.6(6)   |           |
| C2   | Fe1  | C7   | 112.7(4) Fe1 | C6   | Pd1  | 72.2(3)   |           |
| C3   | Fe1  | Pd1  | 134.2(3) N1  | C6   | Pd1  | 59.2(5)   |           |
| C3   | Fe1  | C1   | 65.9(4)      | N1   | C6   | Fe1       | 131.4(7)  |
| C3   | Fe1  | C2   | 39.8(4)      | N1   | C6   | C7        | 125.3(9)  |
| C3   | Fe1  | C4   | 39.7(4)      | N1   | C6   | C10       | 125.9(9)  |
| C3   | Fe1  | C5   | 67.2(4)      | C7   | C6   | Pd1       | 111.6(7)  |
| C3   | Fe1  | C6   | 155.9(4) C7  | C6   | Fe1  | 68.5(6)   |           |
| C3   | Fe1  | C7   | 117.0(5) C7  | C6   | C10  | 108.8(10) |           |
| C3   | Fe1  | C10  | 144.6(5) C10 | C6   | Pd1  | 103.9(6)  |           |
| C4   | Fe1  | Pd1  | 130.8(3) C10 | C6   | Fe1  | 67.0(6)   |           |
| C4   | Fe1  | C1   | 66.5(4)      | C6   | C7   | Fe1       | 72.5(6)   |
| C4   | Fe1  | C2   | 67.2(4)      | C8   | C7   | Fe1       | 67.6(6)   |
| C4   | Fe1  | C5   | 40.5(4)      | C8   | C7   | C6        | 105.9(10) |
| C4   | Fe1  | C6   | 155.0(4) C7  | C8   | Fe1  | 72.5(6)   |           |
| C4   | Fe1  | C7   | 145.5(4) C9  | C8   | Fe1  | 69.3(6)   |           |
| C4   | Fe1  | C10  | 115.2(4) C9  | C8   | C7   | 109.6(10) |           |
| C5   | Fe1  | Pd1  | 90.3(3)      | C8   | C9   | Fe1       | 70.3(6)   |
| C5   | Fe1  | C1   | 39.6(4)      | C10  | C9   | Fe1       | 71.9(6)   |
| C5   | Fe1  | C2   | 67.4(4)      | C10  | C9   | C8        | 108.8(10) |
| C5   | Fe1  | C6   | 136.9(4) C6  | C10  | Fe1  | 73.2(6)   |           |
| C5   | Fe1  | C7   | 174.0(4) C9  | C10  | Fe1  | 68.3(6)   |           |
| C5   | Fe1  | C10  | 111.6(4) C9  | C10  | C6   | 106.6(10) |           |
| C6   | Fe1  | Pd1  | 58.8(3)      | C12  | C11  | P1        | 119.4(7)  |
| C7   | Fe1  | Pd1  | 83.6(3)      | C12  | C11  | C16       | 118.7(9)  |
| C7   | Fe1  | C1   | 136.8(4) C16 | C11  | P1   | 121.7(8)  |           |
| C7   | Fe1  | C6   | 39.0(4)      | C13  | C12  | C11       | 120.4(9)  |
| C8   | Fe1  | Pd1  | 121.5(3) C12 | C13  | C14  | 119.8(9)  |           |
| C8   | Fe1  | C1   | 155.6(4) C15 | C14  | C13  | 119.0(10) |           |
| C8   | Fe1  | C2   | 116.3(5) C16 | C15  | C14  | 122.4(10) |           |
| C8   | Fe1  | C3   | 93.9(5)      | C15  | C16  | C11       | 119.5(10) |
| C8   | Fe1  | C4   | 107.1(4) C18 | C17  | P1   | 119.5(8)  |           |
| C8   | Fe1  | C5   | 145.9(4) C22 | C17  | P1   | 118.4(7)  |           |
| C8   | Fe1  | C6   | 65.3(4)      | C22  | C17  | C18       | 122.0(9)  |
| C8   | Fe1  | C7   | 39.9(5)      | C17  | C18  | C19       | 118.0(9)  |
| C8   | Fe1  | C10  | 67.3(5)      | C20  | C19  | C18       | 120.5(10) |
| C9   | Fe1  | Pd1  | 119.1(3) C19 | C20  | C21  | 121.5(10) |           |
| C9   | Fe1  | C1   | 155.5(4) C20 | C21  | C22  | 119.5(10) |           |
| C9   | Fe1  | C2   | 144.8(5) C17 | C22  | C21  | 118.4(9)  |           |
| C9   | Fe1  | C3   | 106.7(5) F1  | Sb1  | F2   | 177.5(3)  |           |
| C9   | Fe1  | C4   | 92.6(4)      | F1   | Sb1  | F3        | 89.7(3)   |
| C9   | Fe1  | C5   | 115.9(4) F1  | Sb1  | F4   | 89.3(3)   |           |
| C9   | Fe1  | C6   | 65.9(4)      | F1   | Sb1  | F5        | 90.7(3)   |
| C9   | Fe1  | C7   | 67.8(5)      | F1   | Sb1  | F6        | 89.2(3)   |
| C9   | Fe1  | C8   | 40.4(5)      | F2   | Sb1  | F6        | 89.2(3)   |
| C9   | Fe1  | C10  | 39.9(5)      | F3   | Sb1  | F2        | 92.2(3)   |
| C10  | Fe1  | Pd1  | 80.0(3)      | F3   | Sb1  | F6        | 89.2(3)   |
| C10  | Fe1  | C1   | 137.1(4) F4  | Sb1  | F2   | 88.8(3)   |           |
| C10  | Fe1  | C2   | 175.3(4) F4  | Sb1  | F3   | 179.0(3)  |           |
| C10  | Fe1  | C6   | 39.8(4)      | F4   | Sb1  | F5        | 90.8(3)   |



| Atom | Atom | Atom | Angle/°  | Atom | Atom | Atom | Angle/°  |
|------|------|------|----------|------|------|------|----------|
| C10  | Fe1  | C7   | 67.8(4)  | F4   | Sb1  | F6   | 90.9(3)  |
| C6   | N1   | Pd1  | 86.3(6)  | F5   | Sb1  | F2   | 90.9(3)  |
| C6   | N1   | C23  | 117.3(8) | F5   | Sb1  | F3   | 89.2(3)  |
| C6   | N1   | C24  | 117.6(8) | F5   | Sb1  | F6   | 178.3(3) |

**Table S15:** Bond lengths and angles for compound **12**

| Atom | Atom | Length/Å  | Atom | Atom | Length/Å  |
|------|------|-----------|------|------|-----------|
| C1   | Fe1  | 2.103(7)  | C16  | C17  | 1.390(12) |
| C1   | P2   | 1.766(8)  | C17  | C18  | 1.376(11) |
| C1   | C2   | 1.447(10) | C19  | C20  | 1.376(12) |
| C1   | C5   | 1.439(11) | C19  | C24  | 1.378(12) |
| Fe1  | Pd1  | 2.811(3)  | C20  | C21  | 1.417(12) |
| Fe1  | C2   | 2.059(7)  | C21  | C22  | 1.358(13) |
| Fe1  | C3   | 2.062(8)  | C22  | C23  | 1.355(14) |
| Fe1  | C4   | 2.062(8)  | C23  | C24  | 1.399(12) |
| Fe1  | C5   | 2.086(8)  | C25  | C26  | 1.419(12) |
| Fe1  | C6   | 2.143(8)  | C25  | C30  | 1.398(12) |
| Fe1  | C7   | 2.078(7)  | C26  | C27  | 1.346(12) |
| Fe1  | C8   | 2.051(7)  | C27  | C28  | 1.394(13) |
| Fe1  | C9   | 2.045(8)  | C28  | C29  | 1.341(14) |
| Fe1  | C10  | 2.092(7)  | C29  | C30  | 1.373(12) |
| P1   | Pd1  | 2.310(3)  | C31  | C32  | 1.412(11) |
| P1   | C25  | 1.795(8)  | C31  | C35  | 1.375(11) |
| P1   | C31  | 1.811(8)  | C32  | C33  | 1.383(12) |
| P1   | C36  | 1.800(9)  | C33  | C41  | 1.347(13) |
| Pd1  | N1   | 2.140(6)  | C34  | C35  | 1.392(12) |
| Pd1  | P2   | 2.236(3)  | C34  | C41  | 1.364(13) |
| Pd1  | C6   | 2.522(9)  | C36  | C37  | 1.334(11) |
| N1   | C6   | 1.388(10) | C36  | C40  | 1.482(12) |
| N1   | C11  | 1.491(10) | C37  | C38  | 1.484(15) |
| N1   | C12  | 1.480(10) | C38  | C39  | 1.375(15) |
| P2   | C13  | 1.802(8)  | C39  | C40  | 1.482(13) |
| P2   | C19  | 1.816(8)  | Sb2  | F7   | 1.876(5)  |
| C2   | C3   | 1.409(11) | Sb2  | F8   | 1.877(5)  |
| C3   | C4   | 1.426(11) | Sb2  | F9   | 1.884(5)  |
| C4   | C5   | 1.416(12) | Sb2  | F10  | 1.874(5)  |
| C6   | C7   | 1.448(11) | Sb2  | F11  | 1.866(5)  |
| C6   | C10  | 1.431(11) | Sb2  | F12  | 1.860(5)  |
| C7   | C8   | 1.415(12) | Sb1  | F1   | 1.893(5)  |
| C8   | C9   | 1.407(12) | Sb1  | F2   | 1.864(6)  |
| C9   | C10  | 1.424(11) | Sb1  | F3   | 1.874(5)  |
| C13  | C14  | 1.373(11) | Sb1  | F4   | 1.854(5)  |
| C13  | C18  | 1.376(11) | Sb1  | F5   | 1.864(6)  |
| C14  | C15  | 1.396(11) | Sb1  | F6   | 1.879(5)  |
| C15  | C16  | 1.386(12) |      |      |           |

| Atom | Atom | Atom | Angle/°  | Atom | Atom | Atom | Angle/°   |
|------|------|------|----------|------|------|------|-----------|
| P2   | C1   | Fe1  | 114.4(4) | C5   | C4   | Fe1  | 71.0(5)   |
| C2   | C1   | Fe1  | 68.0(4)  | C5   | C4   | C3   | 108.4(8)  |
| C2   | C1   | P2   | 125.4(6) | C1   | C5   | Fe1  | 70.5(4)   |
| C5   | C1   | Fe1  | 69.3(4)  | C4   | C5   | C1   | 107.5(7)  |
| C5   | C1   | P2   | 124.3(6) | C4   | C5   | Fe1  | 69.1(5)   |
| C5   | C1   | C2   | 107.9(7) | Fe1  | C6   | Pd1  | 73.6(2)   |
| C1   | Fe1  | Pd1  | 70.8(2)  | N1   | C6   | Fe1  | 130.8(6)  |
| C1   | Fe1  | C6   | 130.2(3) | N1   | C6   | Pd1  | 58.0(4)   |
| C2   | Fe1  | C1   | 40.7(3)  | N1   | C6   | C7   | 125.8(7)  |
| C2   | Fe1  | Pd1  | 85.5(2)  | N1   | C6   | C10  | 126.8(7)  |
| C2   | Fe1  | C3   | 40.0(3)  | C7   | C6   | Fe1  | 67.5(4)   |
| C2   | Fe1  | C4   | 68.2(3)  | C7   | C6   | Pd1  | 99.8(5)   |
| C2   | Fe1  | C5   | 68.5(3)  | C10  | C6   | Fe1  | 68.4(4)   |
| C2   | Fe1  | C6   | 128.4(3) | C10  | C6   | Pd1  | 118.8(5)  |
| C2   | Fe1  | C7   | 163.1(3) | C10  | C6   | C7   | 107.3(7)  |
| C2   | Fe1  | C10  | 111.5(3) | C6   | C7   | Fe1  | 72.4(4)   |
| C3   | Fe1  | C1   | 66.9(3)  | C8   | C7   | Fe1  | 68.9(4)   |
| C3   | Fe1  | Pd1  | 125.5(2) | C8   | C7   | C6   | 107.8(7)  |
| C3   | Fe1  | C4   | 40.5(3)  | C7   | C8   | Fe1  | 71.0(4)   |
| C3   | Fe1  | C5   | 67.5(3)  | C9   | C8   | Fe1  | 69.7(4)   |
| C3   | Fe1  | C6   | 145.1(3) | C9   | C8   | C7   | 108.2(7)  |
| C3   | Fe1  | C7   | 156.8(3) | C8   | C9   | Fe1  | 70.2(5)   |
| C3   | Fe1  | C10  | 107.2(3) | C8   | C9   | C10  | 109.2(8)  |
| C4   | Fe1  | C1   | 67.1(3)  | C10  | C9   | Fe1  | 71.7(4)   |
| C4   | Fe1  | Pd1  | 137.0(2) | C6   | C10  | Fe1  | 72.2(4)   |
| C4   | Fe1  | C5   | 39.9(3)  | C9   | C10  | Fe1  | 68.1(4)   |
| C4   | Fe1  | C6   | 161.4(3) | C9   | C10  | C6   | 107.3(7)  |
| C4   | Fe1  | C7   | 125.9(3) | C14  | C13  | P2   | 119.8(6)  |
| C4   | Fe1  | C10  | 132.4(3) | C14  | C13  | C18  | 119.4(8)  |
| C5   | Fe1  | C1   | 40.2(3)  | C18  | C13  | P2   | 120.8(6)  |
| C5   | Fe1  | Pd1  | 99.7(3)  | C13  | C14  | C15  | 121.0(8)  |
| C5   | Fe1  | C6   | 146.8(3) | C16  | C15  | C14  | 119.5(8)  |
| C5   | Fe1  | C10  | 172.2(3) | C15  | C16  | C17  | 118.8(8)  |
| C6   | Fe1  | Pd1  | 59.4(2)  | C18  | C17  | C16  | 121.1(8)  |
| C7   | Fe1  | C1   | 131.0(3) | C13  | C18  | C17  | 120.2(8)  |
| C7   | Fe1  | Pd1  | 77.5(2)  | C20  | C19  | P2   | 118.7(6)  |
| C7   | Fe1  | C5   | 114.9(3) | C20  | C19  | C24  | 120.4(8)  |
| C7   | Fe1  | C6   | 40.1(3)  | C24  | C19  | P2   | 120.8(7)  |
| C7   | Fe1  | C10  | 67.6(3)  | C19  | C20  | C21  | 119.2(8)  |
| C8   | Fe1  | C1   | 147.7(3) | C22  | C21  | C20  | 120.2(10) |
| C8   | Fe1  | Pd1  | 117.5(3) | C23  | C22  | C21  | 119.7(9)  |
| C8   | Fe1  | C2   | 156.6(3) | C22  | C23  | C24  | 121.8(9)  |
| C8   | Fe1  | C3   | 116.7(3) | C19  | C24  | C23  | 118.5(9)  |
| C8   | Fe1  | C4   | 94.7(3)  | C26  | C25  | P1   | 122.9(7)  |
| C8   | Fe1  | C5   | 109.1(3) | C30  | C25  | P1   | 119.7(6)  |
| C8   | Fe1  | C6   | 66.9(3)  | C30  | C25  | C26  | 117.4(7)  |
| C8   | Fe1  | C7   | 40.1(3)  | C27  | C26  | C25  | 121.1(9)  |
| C8   | Fe1  | C10  | 67.7(3)  | C26  | C27  | C28  | 119.3(9)  |
| C9   | Fe1  | C1   | 160.7(3) | C29  | C28  | C27  | 121.5(9)  |
| C9   | Fe1  | Pd1  | 125.0(3) | C28  | C29  | C30  | 120.0(10) |
| C9   | Fe1  | C2   | 123.7(3) | C29  | C30  | C25  | 120.7(9)  |
| C9   | Fe1  | C3   | 93.8(4)  | C32  | C31  | P1   | 118.5(6)  |
| C9   | Fe1  | C4   | 97.9(3)  | C35  | C31  | P1   | 121.9(7)  |

| Atom | Atom | Atom | Angle/°    | Atom | Atom | Atom | Angle/°  |
|------|------|------|------------|------|------|------|----------|
| C9   | Fe1  | C5   | 132.8(3)   | C35  | C31  | C32  | 119.6(8) |
| C9   | Fe1  | C6   | 66.6(3)    | C33  | C32  | C31  | 118.6(8) |
| C9   | Fe1  | C7   | 67.4(3)    | C41  | C33  | C32  | 120.4(9) |
| C9   | Fe1  | C8   | 40.2(3)    | C41  | C34  | C35  | 118.9(9) |
| C9   | Fe1  | C10  | 40.2(3)    | C31  | C35  | C34  | 120.3(9) |
| C10  | Fe1  | C1   | 144.2(3)   | C37  | C36  | P1   | 125.4(7) |
| C10  | Fe1  | Pd1  | 88.0(2)    | C37  | C36  | C40  | 109.0(8) |
| C10  | Fe1  | C6   | 39.5(3)    | C40  | C36  | P1   | 125.6(7) |
| C25  | P1   | Pd1  | 108.3(3)   | C36  | C37  | C38  | 109.5(9) |
| C25  | P1   | C31  | 105.2(4)   | C39  | C38  | C37  | 108.2(9) |
| C25  | P1   | C36  | 108.0(4)   | C38  | C39  | C40  | 107.9(9) |
| C31  | P1   | Pd1  | 115.6(3)   | C36  | C40  | C39  | 105.5(8) |
| C36  | P1   | Pd1  | 115.5(3)   | C33  | C41  | C34  | 122.2(9) |
| C36  | P1   | C31  | 103.7(4)   | F7   | Sb2  | F8   | 179.4(2) |
| P1   | Pd1  | Fe1  | 169.81(6)  | F7   | Sb2  | F9   | 89.5(2)  |
| P1   | Pd1  | C6   | 137.3(2)   | F8   | Sb2  | F9   | 90.0(2)  |
| N1   | Pd1  | Fe1  | 80.08(19)  | F10  | Sb2  | F7   | 91.2(2)  |
| N1   | Pd1  | P1   | 104.0(2)   | F10  | Sb2  | F8   | 89.3(2)  |
| N1   | Pd1  | P2   | 159.11(19) | F10  | Sb2  | F9   | 178.7(2) |
| N1   | Pd1  | C6   | 33.4(2)    | F11  | Sb2  | F7   | 88.9(2)  |
| P2   | Pd1  | Fe1  | 79.49(9)   | F11  | Sb2  | F8   | 90.8(2)  |
| P2   | Pd1  | P1   | 96.88(10)  | F11  | Sb2  | F9   | 89.6(3)  |
| P2   | Pd1  | C6   | 125.8(2)   | F11  | Sb2  | F10  | 89.3(2)  |
| C6   | Pd1  | Fe1  | 46.99(19)  | F12  | Sb2  | F7   | 89.4(2)  |
| C6   | N1   | Pd1  | 88.6(4)    | F12  | Sb2  | F8   | 90.9(2)  |
| C6   | N1   | C11  | 114.4(6)   | F12  | Sb2  | F9   | 90.3(2)  |
| C6   | N1   | C12  | 113.6(6)   | F12  | Sb2  | F10  | 90.8(2)  |
| C11  | N1   | Pd1  | 114.8(5)   | F12  | Sb2  | F11  | 178.3(2) |
| C12  | N1   | Pd1  | 114.9(5)   | F2   | Sb1  | F1   | 176.2(3) |
| C12  | N1   | C11  | 109.4(6)   | F2   | Sb1  | F3   | 89.0(2)  |
| C1   | P2   | Pd1  | 92.4(3)    | F2   | Sb1  | F5   | 92.3(3)  |
| C1   | P2   | C13  | 106.4(4)   | F2   | Sb1  | F6   | 89.5(3)  |
| C1   | P2   | C19  | 111.3(4)   | F3   | Sb1  | F1   | 87.8(2)  |
| C13  | P2   | Pd1  | 114.1(3)   | F3   | Sb1  | F6   | 89.0(2)  |
| C13  | P2   | C19  | 108.0(4)   | F4   | Sb1  | F1   | 90.8(3)  |
| C19  | P2   | Pd1  | 122.7(3)   | F4   | Sb1  | F2   | 92.4(3)  |
| C1   | C2   | Fe1  | 71.3(4)    | F4   | Sb1  | F3   | 178.0(2) |
| C3   | C2   | C1   | 107.1(7)   | F4   | Sb1  | F5   | 92.2(3)  |
| C3   | C2   | Fe1  | 70.1(4)    | F4   | Sb1  | F6   | 89.5(2)  |
| C2   | C3   | Fe1  | 69.9(4)    | F5   | Sb1  | F1   | 89.7(3)  |
| C2   | C3   | C4   | 109.1(7)   | F5   | Sb1  | F3   | 89.3(2)  |
| C4   | C3   | Fe1  | 69.8(4)    | F5   | Sb1  | F6   | 177.5(3) |
| C3   | C4   | Fe1  | 69.7(4)    | F6   | Sb1  | F1   | 88.4(3)  |

**Table S16:** Bond lengths and angles for compound **13**

| Atom | Atom | Length/Å   | Atom | Atom | Length/Å  |
|------|------|------------|------|------|-----------|
| Pd1  | N1   | 2.123(8)   | C15  | C16  | 1.398(17) |
| Pd1  | Fe1  | 2.8289(19) | C16  | C17  | 1.363(16) |
| Pd1  | P1   | 2.305(2)   | C17  | C18  | 1.408(14) |
| Pd1  | P2   | 2.252(2)   | C19  | C20  | 1.386(13) |
| Pd1  | C6   | 2.526(9)   | C19  | C24  | 1.422(14) |
| N1   | C6   | 1.415(12)  | C20  | C21  | 1.384(15) |
| N1   | C11  | 1.482(13)  | C21  | C22  | 1.376(15) |

|     |     |           |     |     |           |
|-----|-----|-----------|-----|-----|-----------|
| N1  | C12 | 1.499(12) | C22 | C23 | 1.379(14) |
| Fe1 | C1  | 2.114(10) | C23 | C24 | 1.399(14) |
| Fe1 | C2  | 2.071(10) | C25 | C26 | 1.366(15) |
| Fe1 | C3  | 2.057(10) | C25 | C30 | 1.410(14) |
| Fe1 | C4  | 2.068(10) | C26 | C27 | 1.425(17) |
| Fe1 | C5  | 2.086(11) | C27 | C28 | 1.39(2)   |
| Fe1 | C6  | 2.124(10) | C28 | C29 | 1.341(19) |
| Fe1 | C7  | 2.058(11) | C29 | C30 | 1.403(15) |
| Fe1 | C8  | 2.063(10) | C31 | C32 | 1.394(14) |
| Fe1 | C9  | 2.072(11) | C31 | C36 | 1.398(14) |
| Fe1 | C10 | 2.075(11) | C32 | C33 | 1.383(15) |
| P1  | C13 | 1.818(10) | C33 | C34 | 1.387(17) |
| P1  | C19 | 1.805(10) | C34 | C35 | 1.362(17) |
| P1  | C25 | 1.802(10) | C35 | C36 | 1.384(15) |
| C1  | P2  | 1.758(10) | C37 | C38 | 1.400(13) |
| C1  | C2  | 1.441(13) | C37 | C42 | 1.389(13) |
| C1  | C5  | 1.436(13) | C38 | C39 | 1.400(14) |
| P2  | C31 | 1.811(10) | C39 | C40 | 1.381(16) |
| P2  | C37 | 1.791(10) | C40 | C41 | 1.383(16) |
| C2  | C3  | 1.399(14) | C41 | C42 | 1.392(15) |
| C3  | C4  | 1.402(16) | B2  | F5  | 1.276(17) |
| C4  | C5  | 1.396(14) | B2  | F6  | 1.335(18) |
| C6  | C7  | 1.413(14) | B2  | F7  | 1.294(17) |
| C6  | C10 | 1.426(15) | B2  | F8  | 1.49(2)   |
| C7  | C8  | 1.400(16) | F1  | B1  | 1.386(14) |
| C8  | C9  | 1.436(18) | B1  | F2  | 1.375(15) |
| C9  | C10 | 1.388(16) | B1  | F3  | 1.367(14) |
| C13 | C14 | 1.386(14) | B1  | F4  | 1.405(13) |
| C13 | C18 | 1.409(13) | Cl1 | C43 | 1.786(16) |
| C14 | C15 | 1.397(14) | Cl2 | C43 | 1.787(15) |

| Atom | Atom | Atom | Angle/°   | Atom | Atom | Atom | Angle/°   |
|------|------|------|-----------|------|------|------|-----------|
| N1   | Pd1  | Fe1  | 79.8(2)   | C37  | P2   | C31  | 107.7(4)  |
| N1   | Pd1  | P1   | 99.5(2)   | C1   | C2   | Fe1  | 71.4(6)   |
| N1   | Pd1  | P2   | 158.9(2)  | C3   | C2   | Fe1  | 69.7(6)   |
| N1   | Pd1  | C6   | 34.0(3)   | C3   | C2   | C1   | 108.2(9)  |
| P1   | Pd1  | Fe1  | 177.64(7) | C2   | C3   | Fe1  | 70.7(6)   |
| P1   | Pd1  | C6   | 133.3(2)  | C2   | C3   | C4   | 108.1(9)  |
| P2   | Pd1  | Fe1  | 79.47(7)  | C4   | C3   | Fe1  | 70.6(6)   |
| P2   | Pd1  | P1   | 100.98(9) | C3   | C4   | Fe1  | 69.7(6)   |
| P2   | Pd1  | C6   | 125.7(2)  | C5   | C4   | Fe1  | 71.0(6)   |
| C6   | Pd1  | Fe1  | 46.3(2)   | C5   | C4   | C3   | 109.7(9)  |
| C6   | N1   | Pd1  | 88.8(5)   | C1   | C5   | Fe1  | 71.1(6)   |
| C6   | N1   | C11  | 112.9(8)  | C4   | C5   | Fe1  | 69.7(6)   |
| C6   | N1   | C12  | 110.7(7)  | C4   | C5   | C1   | 107.4(9)  |
| C11  | N1   | Pd1  | 112.4(6)  | N1   | C6   | Pd1  | 57.2(4)   |
| C11  | N1   | C12  | 109.3(8)  | N1   | C6   | Fe1  | 130.2(6)  |
| C12  | N1   | Pd1  | 121.4(6)  | N1   | C6   | C10  | 125.6(9)  |
| C1   | Fe1  | Pd1  | 70.9(3)   | Fe1  | C6   | Pd1  | 74.4(3)   |
| C1   | Fe1  | C6   | 130.1(4)  | C7   | C6   | Pd1  | 120.6(7)  |
| C2   | Fe1  | Pd1  | 87.8(3)   | C7   | C6   | N1   | 126.8(9)  |
| C2   | Fe1  | C1   | 40.3(4)   | C7   | C6   | Fe1  | 67.7(6)   |
| C2   | Fe1  | C5   | 67.4(4)   | C7   | C6   | C10  | 107.6(9)  |
| C2   | Fe1  | C6   | 128.6(4)  | C10  | C6   | Pd1  | 98.2(6)   |
| C2   | Fe1  | C9   | 156.8(4)  | C10  | C6   | Fe1  | 68.3(6)   |
| C2   | Fe1  | C10  | 163.6(4)  | C6   | C7   | Fe1  | 72.8(6)   |
| C3   | Fe1  | Pd1  | 127.4(3)  | C8   | C7   | Fe1  | 70.3(6)   |
| C3   | Fe1  | C1   | 66.9(4)   | C8   | C7   | C6   | 107.9(10) |
| C3   | Fe1  | C2   | 39.6(4)   | C7   | C8   | Fe1  | 69.9(6)   |
| C3   | Fe1  | C4   | 39.7(4)   | C7   | C8   | C9   | 108.2(10) |

|     |     |     |          |     |     |     |           |
|-----|-----|-----|----------|-----|-----|-----|-----------|
| C3  | Fe1 | C5  | 67.0(4)  | C9  | C8  | Fe1 | 70.0(6)   |
| C3  | Fe1 | C6  | 144.6(4) | C8  | C9  | Fe1 | 69.3(6)   |
| C3  | Fe1 | C7  | 106.6(4) | C10 | C9  | Fe1 | 70.5(6)   |
| C3  | Fe1 | C8  | 93.7(5)  | C10 | C9  | C8  | 107.5(10) |
| C3  | Fe1 | C9  | 117.4(5) | C6  | C10 | Fe1 | 72.0(6)   |
| C3  | Fe1 | C10 | 156.5(4) | C9  | C10 | Fe1 | 70.3(6)   |
| C4  | Fe1 | Pd1 | 135.7(3) | C9  | C10 | C6  | 108.6(10) |
| C4  | Fe1 | C1  | 66.2(4)  | C14 | C13 | P1  | 122.0(8)  |
| C4  | Fe1 | C2  | 66.4(4)  | C14 | C13 | C18 | 118.7(9)  |
| C4  | Fe1 | C5  | 39.3(4)  | C18 | C13 | P1  | 119.2(7)  |
| C4  | Fe1 | C6  | 162.9(4) | C13 | C14 | C15 | 121.3(10) |
| C4  | Fe1 | C9  | 97.2(5)  | C14 | C15 | C16 | 119.2(10) |
| C4  | Fe1 | C10 | 127.6(5) | C17 | C16 | C15 | 120.4(10) |
| C5  | Fe1 | Pd1 | 98.5(3)  | C16 | C17 | C18 | 120.7(10) |
| C5  | Fe1 | C1  | 40.0(4)  | C17 | C18 | C13 | 119.6(9)  |
| C5  | Fe1 | C6  | 147.6(4) | C20 | C19 | P1  | 124.3(8)  |
| C6  | Fe1 | Pd1 | 59.3(2)  | C20 | C19 | C24 | 118.6(9)  |
| C7  | Fe1 | Pd1 | 88.9(3)  | C24 | C19 | P1  | 117.0(7)  |
| C7  | Fe1 | C1  | 142.9(4) | C21 | C20 | C19 | 121.2(10) |
| C7  | Fe1 | C2  | 110.8(4) | C22 | C21 | C20 | 119.4(10) |
| C7  | Fe1 | C4  | 133.0(4) | C21 | C22 | C23 | 121.8(10) |
| C7  | Fe1 | C5  | 172.3(4) | C22 | C23 | C24 | 119.0(10) |
| C7  | Fe1 | C6  | 39.5(4)  | C23 | C24 | C19 | 120.0(9)  |
| C7  | Fe1 | C8  | 39.7(5)  | C26 | C25 | P1  | 120.8(8)  |
| C7  | Fe1 | C9  | 67.6(5)  | C26 | C25 | C30 | 120.7(10) |
| C7  | Fe1 | C10 | 67.3(4)  | C30 | C25 | P1  | 118.4(8)  |
| C8  | Fe1 | Pd1 | 124.6(4) | C25 | C26 | C27 | 118.6(11) |
| C8  | Fe1 | C1  | 160.6(4) | C28 | C27 | C26 | 119.4(12) |
| C8  | Fe1 | C2  | 123.1(5) | C29 | C28 | C27 | 122.1(11) |
| C8  | Fe1 | C4  | 99.7(5)  | C28 | C29 | C30 | 119.4(11) |
| C8  | Fe1 | C5  | 134.3(5) | C29 | C30 | C25 | 119.8(10) |
| C8  | Fe1 | C6  | 65.8(4)  | C32 | C31 | P2  | 119.5(7)  |
| C8  | Fe1 | C9  | 40.6(5)  | C32 | C31 | C36 | 119.7(9)  |
| C8  | Fe1 | C10 | 66.8(5)  | C36 | C31 | P2  | 120.8(7)  |
| C9  | Fe1 | Pd1 | 115.0(3) | C33 | C32 | C31 | 120.3(10) |
| C9  | Fe1 | C1  | 149.1(5) | C32 | C33 | C34 | 119.7(11) |
| C9  | Fe1 | C5  | 110.8(5) | C35 | C34 | C33 | 119.9(10) |
| C9  | Fe1 | C6  | 66.0(4)  | C34 | C35 | C36 | 122.0(11) |
| C9  | Fe1 | C10 | 39.1(4)  | C35 | C36 | C31 | 118.5(10) |
| C10 | Fe1 | Pd1 | 75.9(3)  | C38 | C37 | P2  | 121.1(7)  |
| C10 | Fe1 | C1  | 132.1(4) | C42 | C37 | P2  | 120.6(7)  |
| C10 | Fe1 | C5  | 116.6(4) | C42 | C37 | C38 | 118.1(9)  |
| C10 | Fe1 | C6  | 39.7(4)  | C37 | C38 | C39 | 120.7(9)  |
| C13 | P1  | Pd1 | 116.4(3) | C40 | C39 | C38 | 119.8(10) |
| C19 | P1  | Pd1 | 114.9(3) | C39 | C40 | C41 | 120.0(10) |
| C19 | P1  | C13 | 102.9(4) | C40 | C41 | C42 | 120.0(10) |
| C25 | P1  | Pd1 | 109.4(3) | C37 | C42 | C41 | 121.2(10) |
| C25 | P1  | C13 | 104.0(5) | F5  | B2  | F6  | 119.3(13) |
| C25 | P1  | C19 | 108.4(5) | F5  | B2  | F7  | 119.4(15) |
| P2  | C1  | Fe1 | 115.4(5) | F5  | B2  | F8  | 96.5(14)  |
| C2  | C1  | Fe1 | 68.3(6)  | F6  | B2  | F8  | 99.0(14)  |
| C2  | C1  | P2  | 125.2(7) | F7  | B2  | F6  | 118.2(13) |
| C5  | C1  | Fe1 | 68.9(6)  | F7  | B2  | F8  | 92.4(13)  |
| C5  | C1  | P2  | 126.3(7) | F1  | B1  | F4  | 109.2(9)  |
| C5  | C1  | C2  | 106.6(9) | F2  | B1  | F1  | 109.0(10) |
| C1  | P2  | Pd1 | 92.9(3)  | F2  | B1  | F4  | 109.7(10) |
| C1  | P2  | C31 | 107.5(4) | F3  | B1  | F1  | 111.6(10) |
| C1  | P2  | C37 | 105.4(4) | F3  | B1  | F2  | 109.6(10) |
| C31 | P2  | Pd1 | 122.2(3) | F3  | B1  | F4  | 107.7(10) |
| C37 | P2  | Pd1 | 118.1(3) | C11 | C43 | C12 | 107.6(8)  |

**Table S17: Bond lengths and angles for compound 14**

| Atom | Atom | Length/Å   | Atom | Atom | Length/Å  |
|------|------|------------|------|------|-----------|
| Pd1  | Fe1  | 2.8184(9)  | C22  | C17  | 1.401(8)  |
| Pd1  | P2   | 2.2297(15) | C22  | C21  | 1.365(9)  |
| Pd1  | P1   | 2.3022(14) | C5   | C4   | 1.402(10) |
| Pd1  | N1   | 2.138(5)   | N2   | C40  | 1.485(8)  |
| Pd1  | C6   | 2.514(5)   | N2   | C48  | 1.501(8)  |
| Fe1  | C1   | 2.118(6)   | N2   | C47  | 1.493(9)  |
| Fe1  | C5   | 2.052(7)   | C38  | C37  | 1.406(10) |
| Fe1  | C9   | 2.044(6)   | C38  | C39  | 1.424(9)  |
| Fe1  | C8   | 2.067(6)   | C9   | C8   | 1.430(8)  |
| Fe1  | C7   | 2.084(6)   | C9   | C10  | 1.399(9)  |
| Fe1  | C10  | 2.080(6)   | C35  | C36  | 1.423(8)  |
| Fe1  | C6   | 2.103(6)   | C35  | C39  | 1.435(9)  |
| Fe1  | C2   | 2.088(6)   | C36  | C37  | 1.442(9)  |
| Fe1  | C4   | 2.056(6)   | C8   | C7   | 1.410(8)  |
| Fe1  | C3   | 2.069(7)   | C23  | C28  | 1.379(8)  |
| Fe2  | C38  | 2.040(6)   | C23  | C24  | 1.383(9)  |
| Fe2  | C35  | 2.061(6)   | C7   | C6   | 1.428(9)  |
| Fe2  | C36  | 2.064(5)   | C10  | C6   | 1.426(7)  |
| Fe2  | C37  | 2.054(6)   | C17  | C18  | 1.401(8)  |
| Fe2  | C40  | 2.001(6)   | C21  | C20  | 1.365(9)  |
| Fe2  | C44  | 2.065(7)   | F7   | B2   | 1.356(10) |
| Fe2  | C39  | 2.035(6)   | C30  | C31  | 1.377(9)  |
| Fe2  | C41  | 2.054(6)   | C2   | C3   | 1.422(8)  |
| Fe2  | C42  | 2.062(6)   | C34  | C33  | 1.394(10) |
| Fe2  | C43  | 2.053(6)   | C28  | C27  | 1.385(8)  |
| P2   | C1   | 1.766(6)   | C11  | C16  | 1.399(8)  |
| P2   | C29  | 1.802(6)   | C11  | C12  | 1.399(10) |
| P2   | C23  | 1.804(6)   | C40  | C44  | 1.424(9)  |
| P1   | C35  | 1.795(6)   | C40  | C41  | 1.414(9)  |
| P1   | C17  | 1.813(6)   | C27  | C26  | 1.382(10) |
| P1   | C11  | 1.810(5)   | C32  | C33  | 1.388(11) |
| F1   | B1   | 1.391(8)   | C32  | C31  | 1.386(10) |
| F4   | B1   | 1.405(8)   | C44  | C43  | 1.420(10) |
| F2   | B1   | 1.378(8)   | C16  | C15  | 1.380(9)  |
| F3   | B1   | 1.393(7)   | C18  | C19  | 1.356(9)  |
| F8   | B2   | 1.372(10)  | C41  | C42  | 1.436(10) |
| N1   | C6   | 1.427(7)   | C20  | C19  | 1.383(10) |
| N1   | C45  | 1.477(8)   | C12  | C13  | 1.385(8)  |
| N1   | C46  | 1.495(8)   | C42  | C43  | 1.413(11) |
| C1   | C5   | 1.462(8)   | C24  | C25  | 1.381(9)  |
| C1   | C2   | 1.444(10)  | C4   | C3   | 1.378(11) |
| F5   | B2   | 1.361(8)   | C26  | C25  | 1.396(10) |
| F6   | B2   | 1.358(10)  | C14  | C13  | 1.389(11) |
| C29  | C30  | 1.405(8)   | C14  | C15  | 1.393(11) |
| C29  | C34  | 1.398(9)   |      |      |           |

| Atom | Atom | Atom | Angle/°    | Atom | Atom | Atom | Angle/°  |
|------|------|------|------------|------|------|------|----------|
| P2   | Pd1  | Fe1  | 79.74(4)   | C45  | N1   | C46  | 110.7(5) |
| P2   | Pd1  | P1   | 98.14(5)   | C46  | N1   | Pd1  | 110.7(4) |
| P2   | Pd1  | C6   | 125.53(14) | P2   | C1   | Fe1  | 114.3(3) |
| P1   | Pd1  | Fe1  | 176.43(5)  | C5   | C1   | Fe1  | 67.1(3)  |
| P1   | Pd1  | C6   | 136.30(14) | C5   | C1   | P2   | 127.8(5) |
| N1   | Pd1  | Fe1  | 79.50(13)  | C2   | C1   | Fe1  | 68.8(3)  |
| N1   | Pd1  | P2   | 158.79(13) | C2   | C1   | P2   | 123.8(4) |
| N1   | Pd1  | P1   | 102.37(13) | C2   | C1   | C5   | 105.8(5) |
| N1   | Pd1  | C6   | 34.54(18)  | C30  | C29  | P2   | 119.1(5) |
| C6   | Pd1  | Fe1  | 46.02(14)  | C34  | C29  | P2   | 121.4(5) |
| C1   | Fe1  | Pd1  | 70.28(17)  | C34  | C29  | C30  | 119.0(6) |
| C5   | Fe1  | Pd1  | 86.01(19)  | C21  | C22  | C17  | 120.1(6) |
| C5   | Fe1  | C1   | 41.0(2)    | C1   | C5   | Fe1  | 71.9(4)  |
| C5   | Fe1  | C8   | 161.7(2)   | C4   | C5   | Fe1  | 70.2(4)  |
| C5   | Fe1  | C7   | 158.3(3)   | C4   | C5   | C1   | 107.8(7) |
| C5   | Fe1  | C10  | 111.3(3)   | C40  | N2   | C48  | 109.8(5) |
| C5   | Fe1  | C6   | 125.2(3)   | C40  | N2   | C47  | 112.4(5) |
| C5   | Fe1  | C2   | 68.1(3)    | C47  | N2   | C48  | 113.1(5) |
| C5   | Fe1  | C4   | 39.9(3)    | C37  | C38  | Fe2  | 70.5(4)  |
| C5   | Fe1  | C3   | 66.8(3)    | C37  | C38  | C39  | 107.6(6) |
| C9   | Fe1  | Pd1  | 125.63(18) | C39  | C38  | Fe2  | 69.4(4)  |
| C9   | Fe1  | C1   | 162.8(2)   | C8   | C9   | Fe1  | 70.5(3)  |
| C9   | Fe1  | C5   | 126.9(2)   | C10  | C9   | Fe1  | 71.5(3)  |
| C9   | Fe1  | C8   | 40.7(2)    | C10  | C9   | C8   | 109.8(5) |
| C9   | Fe1  | C7   | 67.1(2)    | P1   | C35  | Fe2  | 133.9(3) |
| C9   | Fe1  | C10  | 39.7(3)    | C36  | C35  | Fe2  | 69.9(3)  |
| C9   | Fe1  | C6   | 66.3(2)    | C36  | C35  | P1   | 126.9(5) |
| C9   | Fe1  | C2   | 131.0(3)   | C36  | C35  | C39  | 107.4(5) |
| C9   | Fe1  | C4   | 95.8(2)    | C39  | C35  | Fe2  | 68.5(3)  |
| C9   | Fe1  | C3   | 97.8(3)    | C39  | C35  | P1   | 125.0(4) |
| C8   | Fe1  | Pd1  | 112.23(17) | C35  | C36  | Fe2  | 69.7(3)  |
| C8   | Fe1  | C1   | 145.5(2)   | C35  | C36  | C37  | 107.5(6) |
| C8   | Fe1  | C7   | 39.7(2)    | C37  | C36  | Fe2  | 69.1(3)  |
| C8   | Fe1  | C10  | 67.8(3)    | C9   | C8   | Fe1  | 68.8(3)  |
| C8   | Fe1  | C6   | 66.8(3)    | C7   | C8   | Fe1  | 70.8(3)  |
| C8   | Fe1  | C2   | 108.9(3)   | C7   | C8   | C9   | 107.0(6) |
| C8   | Fe1  | C3   | 98.9(3)    | C38  | C37  | Fe2  | 69.4(3)  |
| C7   | Fe1  | Pd1  | 72.53(16)  | C38  | C37  | C36  | 108.9(6) |
| C7   | Fe1  | C1   | 128.8(2)   | C36  | C37  | Fe2  | 69.9(3)  |
| C7   | Fe1  | C6   | 39.9(2)    | C28  | C23  | P2   | 120.7(4) |
| C7   | Fe1  | C2   | 117.5(3)   | C28  | C23  | C24  | 120.4(6) |
| C10  | Fe1  | Pd1  | 91.87(17)  | C24  | C23  | P2   | 118.5(4) |
| C10  | Fe1  | C1   | 145.8(3)   | C8   | C7   | Fe1  | 69.5(3)  |
| C10  | Fe1  | C7   | 67.6(2)    | C8   | C7   | C6   | 108.0(5) |
| C10  | Fe1  | C6   | 39.9(2)    | C6   | C7   | Fe1  | 70.8(3)  |
| C10  | Fe1  | C2   | 168.6(2)   | C9   | C10  | Fe1  | 68.8(3)  |
| C6   | Fe1  | Pd1  | 59.34(14)  | C9   | C10  | C6   | 106.9(5) |

| Atom | Atom | Atom | Angle/°    | Atom | Atom | Atom | Angle/°   |
|------|------|------|------------|------|------|------|-----------|
| C6   | Fe1  | C1   | 129.3(2)   | C6   | C10  | Fe1  | 71.0(3)   |
| C2   | Fe1  | Pd1  | 99.38(17)  | C22  | C17  | P1   | 118.6(5)  |
| C2   | Fe1  | C1   | 40.2(3)    | C18  | C17  | P1   | 123.7(5)  |
| C2   | Fe1  | C6   | 150.2(2)   | C18  | C17  | C22  | 117.8(6)  |
| C4   | Fe1  | Pd1  | 125.9(2)   | Fe1  | C6   | Pd1  | 74.64(16) |
| C4   | Fe1  | C1   | 67.4(2)    | N1   | C6   | Pd1  | 58.1(3)   |
| C4   | Fe1  | C8   | 121.8(3)   | N1   | C6   | Fe1  | 130.0(4)  |
| C4   | Fe1  | C7   | 161.2(2)   | N1   | C6   | C7   | 124.8(5)  |
| C4   | Fe1  | C10  | 104.9(3)   | C7   | C6   | Pd1  | 93.2(3)   |
| C4   | Fe1  | C6   | 141.7(3)   | C7   | C6   | Fe1  | 69.3(3)   |
| C4   | Fe1  | C2   | 66.9(3)    | C10  | C6   | Pd1  | 126.8(4)  |
| C4   | Fe1  | C3   | 39.0(3)    | C10  | C6   | Fe1  | 69.2(3)   |
| C3   | Fe1  | Pd1  | 136.56(18) | C10  | C6   | N1   | 126.8(6)  |
| C3   | Fe1  | C1   | 67.0(3)    | C10  | C6   | C7   | 108.4(5)  |
| C3   | Fe1  | C7   | 131.9(3)   | C20  | C21  | C22  | 121.3(6)  |
| C3   | Fe1  | C10  | 128.7(2)   | C31  | C30  | C29  | 121.3(7)  |
| C3   | Fe1  | C6   | 163.6(3)   | C1   | C2   | Fe1  | 71.0(4)   |
| C3   | Fe1  | C2   | 40.0(2)    | C3   | C2   | Fe1  | 69.3(4)   |
| C38  | Fe2  | C35  | 69.0(2)    | C3   | C2   | C1   | 107.5(7)  |
| C38  | Fe2  | C36  | 68.7(3)    | C33  | C34  | C29  | 119.0(7)  |
| C38  | Fe2  | C37  | 40.2(3)    | C23  | C28  | C27  | 120.1(6)  |
| C38  | Fe2  | C44  | 158.8(3)   | C16  | C11  | P1   | 123.7(5)  |
| C38  | Fe2  | C41  | 103.7(3)   | C16  | C11  | C12  | 118.9(5)  |
| C38  | Fe2  | C42  | 120.3(3)   | C12  | C11  | P1   | 117.4(5)  |
| C38  | Fe2  | C43  | 157.3(3)   | N2   | C40  | Fe2  | 126.6(4)  |
| C35  | Fe2  | C36  | 40.4(2)    | C44  | C40  | Fe2  | 71.9(3)   |
| C35  | Fe2  | C44  | 123.6(3)   | C44  | C40  | N2   | 121.5(6)  |
| C35  | Fe2  | C42  | 126.2(3)   | C41  | C40  | Fe2  | 71.6(3)   |
| C36  | Fe2  | C44  | 108.8(3)   | C41  | C40  | N2   | 127.0(6)  |
| C37  | Fe2  | C35  | 68.3(2)    | C41  | C40  | C44  | 111.4(6)  |
| C37  | Fe2  | C36  | 41.0(2)    | C26  | C27  | C28  | 119.3(6)  |
| C37  | Fe2  | C44  | 124.3(3)   | C31  | C32  | C33  | 119.7(7)  |
| C37  | Fe2  | C42  | 154.7(3)   | C40  | C44  | Fe2  | 67.1(3)   |
| C40  | Fe2  | C38  | 121.1(3)   | C43  | C44  | Fe2  | 69.4(4)   |
| C40  | Fe2  | C35  | 158.3(3)   | C43  | C44  | C40  | 105.1(6)  |
| C40  | Fe2  | C36  | 121.8(2)   | C38  | C39  | Fe2  | 69.7(3)   |
| C40  | Fe2  | C37  | 106.1(2)   | C38  | C39  | C35  | 108.7(6)  |
| C40  | Fe2  | C44  | 41.0(3)    | C35  | C39  | Fe2  | 70.5(3)   |
| C40  | Fe2  | C39  | 158.2(3)   | C32  | C33  | C34  | 121.3(7)  |
| C40  | Fe2  | C41  | 40.8(3)    | C15  | C16  | C11  | 119.5(7)  |
| C40  | Fe2  | C42  | 67.8(3)    | C30  | C31  | C32  | 119.6(7)  |
| C40  | Fe2  | C43  | 67.7(3)    | C19  | C18  | C17  | 121.1(6)  |
| C39  | Fe2  | C38  | 40.9(2)    | C40  | C41  | Fe2  | 67.6(3)   |
| C39  | Fe2  | C35  | 41.0(2)    | C40  | C41  | C42  | 105.3(7)  |
| C39  | Fe2  | C36  | 68.4(2)    | C42  | C41  | Fe2  | 69.9(4)   |
| C39  | Fe2  | C37  | 67.9(3)    | C21  | C20  | C19  | 119.6(6)  |
| C39  | Fe2  | C44  | 159.4(3)   | C13  | C12  | C11  | 121.2(7)  |



| Atom | Atom | Atom | Angle/°    | Atom | Atom | Atom | Angle/°  |
|------|------|------|------------|------|------|------|----------|
| C39  | Fe2  | C41  | 122.0(3)   | C41  | C42  | Fe2  | 69.3(3)  |
| C39  | Fe2  | C42  | 108.1(3)   | C43  | C42  | Fe2  | 69.6(3)  |
| C39  | Fe2  | C43  | 123.9(3)   | C43  | C42  | C41  | 108.5(6) |
| C41  | Fe2  | C35  | 160.6(3)   | C25  | C24  | C23  | 120.4(6) |
| C41  | Fe2  | C36  | 155.4(3)   | C5   | C4   | Fe1  | 69.9(4)  |
| C41  | Fe2  | C37  | 118.4(3)   | C3   | C4   | Fe1  | 71.0(4)  |
| C41  | Fe2  | C44  | 69.4(3)    | C3   | C4   | C5   | 109.4(6) |
| C41  | Fe2  | C42  | 40.8(3)    | C18  | C19  | C20  | 120.2(6) |
| C42  | Fe2  | C36  | 163.0(3)   | C27  | C26  | C25  | 121.0(6) |
| C42  | Fe2  | C44  | 68.2(3)    | C44  | C43  | Fe2  | 70.3(3)  |
| C43  | Fe2  | C35  | 111.0(3)   | C42  | C43  | Fe2  | 70.3(4)  |
| C43  | Fe2  | C36  | 127.0(3)   | C42  | C43  | C44  | 109.6(6) |
| C43  | Fe2  | C37  | 162.4(3)   | C2   | C3   | Fe1  | 70.7(4)  |
| C43  | Fe2  | C44  | 40.3(3)    | C4   | C3   | Fe1  | 70.0(4)  |
| C43  | Fe2  | C41  | 68.5(3)    | C4   | C3   | C2   | 109.4(7) |
| C43  | Fe2  | C42  | 40.2(3)    | C13  | C14  | C15  | 119.3(6) |
| C1   | P2   | Pd1  | 92.3(2)    | C12  | C13  | C14  | 119.6(7) |
| C1   | P2   | C29  | 110.5(3)   | C16  | C15  | C14  | 121.4(7) |
| C1   | P2   | C23  | 103.7(3)   | C24  | C25  | C26  | 118.8(7) |
| C29  | P2   | Pd1  | 119.4(2)   | F1   | B1   | F4   | 109.1(5) |
| C29  | P2   | C23  | 109.0(3)   | F1   | B1   | F3   | 109.1(5) |
| C23  | P2   | Pd1  | 119.0(2)   | F2   | B1   | F1   | 110.7(6) |
| C35  | P1   | Pd1  | 112.11(19) | F2   | B1   | F4   | 108.5(5) |
| C35  | P1   | C17  | 106.3(3)   | F2   | B1   | F3   | 109.3(6) |
| C35  | P1   | C11  | 104.4(3)   | F3   | B1   | F4   | 110.0(6) |
| C17  | P1   | Pd1  | 110.47(19) | F5   | B2   | F8   | 109.9(6) |
| C11  | P1   | Pd1  | 113.6(2)   | F6   | B2   | F8   | 112.0(7) |
| C11  | P1   | C17  | 109.5(3)   | F6   | B2   | F5   | 107.1(8) |
| C6   | N1   | Pd1  | 87.3(3)    | F7   | B2   | F8   | 111.8(8) |
| C6   | N1   | C45  | 111.1(5)   | F7   | B2   | F5   | 108.3(7) |
| C6   | N1   | C46  | 113.6(5)   | F7   | B2   | F6   | 107.4(7) |
| C45  | N1   | Pd1  | 121.6(3)   |      |      |      |          |

**Table S18:** Bond lengths and angles for compound 15

| Atom | Atom | Length/Å   | Atom | Atom | Length/Å  |
|------|------|------------|------|------|-----------|
| Pd1  | Fe1  | 2.8349(11) | C11  | C16  | 1.381(9)  |
| Pd1  | P1   | 2.2996(17) | C12  | C13  | 1.381(9)  |
| Pd1  | P2   | 2.2468(14) | C13  | C14  | 1.390(10) |
| Pd1  | N1   | 2.146(5)   | C14  | C15  | 1.375(10) |
| Pd1  | C6   | 2.528(6)   | C15  | C16  | 1.387(9)  |
| Fe1  | C1   | 2.104(6)   | C18  | C19  | 1.389(10) |
| Fe1  | C2   | 2.087(7)   | C18  | C23  | 1.383(10) |
| Fe1  | C3   | 2.053(7)   | C19  | C20  | 1.387(10) |
| Fe1  | C4   | 2.055(7)   | C20  | C21  | 1.407(10) |
| Fe1  | C5   | 2.069(7)   | C21  | C22  | 1.385(10) |
| Fe1  | C6   | 2.132(6)   | C22  | C23  | 1.384(10) |
| Fe1  | C7   | 2.078(7)   | C25  | C26  | 1.390(10) |

| Atom | Atom | Length/Å  | Atom | Atom            | Length/Å  |
|------|------|-----------|------|-----------------|-----------|
| Fe1  | C8   | 2.045(7)  | C25  | C30             | 1.395(9)  |
| Fe1  | C9   | 2.043(7)  | C26  | C27             | 1.375(9)  |
| Fe1  | C10  | 2.082(7)  | C27  | C28             | 1.409(10) |
| P1   | C11  | 1.821(6)  | C28  | C29             | 1.377(11) |
| P1   | C18  | 1.814(7)  | C29  | C30             | 1.384(9)  |
| P1   | C25  | 1.823(7)  | C32  | C33             | 1.379(9)  |
| P2   | C1   | 1.770(7)  | C32  | C37             | 1.399(9)  |
| P2   | C32  | 1.800(7)  | C33  | C34             | 1.395(10) |
| P2   | C38  | 1.815(6)  | C34  | C35             | 1.379(11) |
| O1   | C14  | 1.359(8)  | C35  | C36             | 1.380(12) |
| O1   | C17  | 1.441(9)  | C36  | C37             | 1.377(10) |
| O2   | C21  | 1.349(8)  | C38  | C39             | 1.372(9)  |
| O2   | C24  | 1.434(9)  | C38  | C43             | 1.396(9)  |
| O3   | C28  | 1.370(8)  | C39  | C40             | 1.387(10) |
| O3   | C31  | 1.443(9)  | C40  | C41             | 1.367(12) |
| N1   | C6   | 1.408(9)  | C41  | C42             | 1.378(12) |
| N1   | C44  | 1.491(9)  | C42  | C43             | 1.400(10) |
| N1   | C45  | 1.496(8)  | F6   | B2              | 1.356(9)  |
| C1   | C2   | 1.424(9)  | F5   | B2              | 1.373(10) |
| C1   | C5   | 1.446(9)  | B2   | F6 <sup>1</sup> | 1.356(9)  |
| C2   | C3   | 1.414(10) | B2   | F5 <sup>1</sup> | 1.373(10) |
| C3   | C4   | 1.422(11) | F3   | B1              | 1.376(10) |
| C4   | C5   | 1.425(10) | F4   | B1              | 1.387(10) |
| C6   | C7   | 1.427(11) | F1   | B1              | 1.376(12) |
| C6   | C10  | 1.429(10) | F2   | B1              | 1.383(12) |
| C7   | C8   | 1.435(11) | F7   | B3              | 1.306(13) |
| C8   | C9   | 1.413(13) | F8   | B3              | 1.306(11) |
| C9   | C10  | 1.422(12) | B3   | F7 <sup>2</sup> | 1.306(13) |
| C11  | C12  | 1.405(9)  | B3   | F8 <sup>2</sup> | 1.306(11) |

| Atom | Atom | Atom | Angle/°    | Atom | Atom | Atom | Angle/°   |
|------|------|------|------------|------|------|------|-----------|
| P1   | Pd1  | Fe1  | 173.55(5)  | C2   | C3   | Fe1  | 71.3(4)   |
| P1   | Pd1  | C6   | 132.98(15) | C2   | C3   | C4   | 108.9(6)  |
| P2   | Pd1  | Fe1  | 80.39(5)   | C4   | C3   | Fe1  | 69.8(4)   |
| P2   | Pd1  | P1   | 100.13(6)  | C3   | C4   | Fe1  | 69.7(4)   |
| P2   | Pd1  | C6   | 126.74(15) | C3   | C4   | C5   | 108.1(6)  |
| N1   | Pd1  | Fe1  | 80.08(16)  | C5   | C4   | Fe1  | 70.3(4)   |
| N1   | Pd1  | P1   | 99.19(16)  | C1   | C5   | Fe1  | 71.0(4)   |
| N1   | Pd1  | P2   | 160.45(16) | C4   | C5   | Fe1  | 69.3(4)   |
| N1   | Pd1  | C6   | 33.8(2)    | C4   | C5   | C1   | 107.0(6)  |
| C6   | Pd1  | Fe1  | 46.41(15)  | Fe1  | C6   | Pd1  | 74.39(17) |
| C1   | Fe1  | Pd1  | 70.24(17)  | N1   | C6   | Pd1  | 58.0(3)   |
| C1   | Fe1  | C6   | 129.4(2)   | N1   | C6   | Fe1  | 132.0(4)  |
| C2   | Fe1  | Pd1  | 96.57(18)  | N1   | C6   | C7   | 126.1(6)  |
| C2   | Fe1  | C1   | 39.7(3)    | N1   | C6   | C10  | 125.9(7)  |
| C2   | Fe1  | C6   | 143.4(3)   | C7   | C6   | Pd1  | 103.9(4)  |
| C3   | Fe1  | Pd1  | 135.1(2)   | C7   | C6   | Fe1  | 68.2(4)   |

| Atom | Atom | Atom | Angle/°   | Atom | Atom | Atom | Angle/°  |
|------|------|------|-----------|------|------|------|----------|
| C3   | Fe1  | C1   | 66.9(3)   | C7   | C6   | C10  | 107.9(6) |
| C3   | Fe1  | C2   | 39.9(3)   | C10  | C6   | Pd1  | 115.8(5) |
| C3   | Fe1  | C4   | 40.5(3)   | C10  | C6   | Fe1  | 68.3(4)  |
| C3   | Fe1  | C5   | 68.0(3)   | C6   | C7   | Fe1  | 72.2(4)  |
| C3   | Fe1  | C6   | 160.5(3)  | C6   | C7   | C8   | 107.6(7) |
| C3   | Fe1  | C7   | 122.7(3)  | C8   | C7   | Fe1  | 68.4(4)  |
| C3   | Fe1  | C10  | 137.0(3)  | C7   | C8   | Fe1  | 70.9(4)  |
| C4   | Fe1  | Pd1  | 128.3(2)  | C9   | C8   | Fe1  | 69.7(4)  |
| C4   | Fe1  | C1   | 67.4(3)   | C9   | C8   | C7   | 108.1(7) |
| C4   | Fe1  | C2   | 67.7(3)   | C8   | C9   | Fe1  | 69.9(4)  |
| C4   | Fe1  | C5   | 40.4(3)   | C8   | C9   | C10  | 108.5(7) |
| C4   | Fe1  | C6   | 148.5(3)  | C10  | C9   | Fe1  | 71.3(4)  |
| C4   | Fe1  | C7   | 152.4(3)  | C6   | C10  | Fe1  | 72.1(4)  |
| C4   | Fe1  | C10  | 109.3(3)  | C9   | C10  | Fe1  | 68.4(4)  |
| C5   | Fe1  | Pd1  | 87.9(2)   | C9   | C10  | C6   | 107.9(7) |
| C5   | Fe1  | C1   | 40.5(3)   | C12  | C11  | P1   | 118.0(5) |
| C5   | Fe1  | C2   | 68.0(3)   | C16  | C11  | P1   | 123.7(5) |
| C5   | Fe1  | C6   | 130.8(3)  | C16  | C11  | C12  | 118.3(6) |
| C5   | Fe1  | C7   | 167.1(3)  | C13  | C12  | C11  | 120.8(6) |
| C5   | Fe1  | C10  | 110.6(3)  | C12  | C13  | C14  | 119.6(6) |
| C6   | Fe1  | Pd1  | 59.20(17) | O1   | C14  | C13  | 115.2(6) |
| C7   | Fe1  | Pd1  | 79.3(2)   | O1   | C14  | C15  | 124.6(7) |
| C7   | Fe1  | C1   | 133.3(3)  | C15  | C14  | C13  | 120.2(6) |
| C7   | Fe1  | C2   | 114.6(3)  | C14  | C15  | C16  | 119.9(7) |
| C7   | Fe1  | C6   | 39.6(3)   | C11  | C16  | C15  | 121.2(7) |
| C7   | Fe1  | C10  | 67.4(3)   | C19  | C18  | P1   | 120.3(5) |
| C8   | Fe1  | Pd1  | 119.5(2)  | C23  | C18  | P1   | 121.2(5) |
| C8   | Fe1  | C1   | 151.3(3)  | C23  | C18  | C19  | 118.5(6) |
| C8   | Fe1  | C2   | 112.1(3)  | C20  | C19  | C18  | 120.2(7) |
| C8   | Fe1  | C3   | 93.6(3)   | C19  | C20  | C21  | 120.7(7) |
| C8   | Fe1  | C4   | 111.8(3)  | O2   | C21  | C20  | 115.5(6) |
| C8   | Fe1  | C5   | 151.6(3)  | O2   | C21  | C22  | 125.5(6) |
| C8   | Fe1  | C6   | 67.1(3)   | C22  | C21  | C20  | 119.0(6) |
| C8   | Fe1  | C7   | 40.7(3)   | C23  | C22  | C21  | 119.4(6) |
| C8   | Fe1  | C10  | 67.7(4)   | C18  | C23  | C22  | 122.3(6) |
| C9   | Fe1  | Pd1  | 124.2(2)  | C26  | C25  | P1   | 121.6(5) |
| C9   | Fe1  | C1   | 158.5(3)  | C26  | C25  | C30  | 117.6(6) |
| C9   | Fe1  | C2   | 137.6(3)  | C30  | C25  | P1   | 120.6(5) |
| C9   | Fe1  | C3   | 100.7(3)  | C27  | C26  | C25  | 121.3(6) |
| C9   | Fe1  | C4   | 91.6(3)   | C26  | C27  | C28  | 119.8(7) |
| C9   | Fe1  | C5   | 119.4(3)  | O3   | C28  | C27  | 116.1(6) |
| C9   | Fe1  | C6   | 67.0(3)   | O3   | C28  | C29  | 123.9(6) |
| C9   | Fe1  | C7   | 68.0(3)   | C29  | C28  | C27  | 119.9(6) |
| C9   | Fe1  | C8   | 40.4(4)   | C28  | C29  | C30  | 119.0(6) |
| C9   | Fe1  | C10  | 40.3(3)   | C29  | C30  | C25  | 122.3(7) |
| C10  | Fe1  | Pd1  | 86.1(2)   | C33  | C32  | P2   | 123.2(5) |
| C10  | Fe1  | C1   | 140.8(3)  | C33  | C32  | C37  | 118.5(6) |

| Atom | Atom | Atom | Angle/°   | Atom            | Atom | Atom            | Angle/°   |
|------|------|------|-----------|-----------------|------|-----------------|-----------|
| C10  | Fe1  | C2   | 176.9(3)  | C37             | C32  | P2              | 118.3(5)  |
| C10  | Fe1  | C6   | 39.6(3)   | C32             | C33  | C34             | 120.9(7)  |
| C11  | P1   | Pd1  | 114.7(2)  | C35             | C34  | C33             | 119.5(7)  |
| C11  | P1   | C25  | 105.4(3)  | C34             | C35  | C36             | 120.4(7)  |
| C18  | P1   | Pd1  | 109.9(2)  | C37             | C36  | C35             | 119.7(7)  |
| C18  | P1   | C11  | 107.4(3)  | C36             | C37  | C32             | 121.0(7)  |
| C18  | P1   | C25  | 104.9(3)  | C39             | C38  | P2              | 121.7(5)  |
| C25  | P1   | Pd1  | 113.8(2)  | C39             | C38  | C43             | 120.0(6)  |
| C1   | P2   | Pd1  | 91.80(19) | C43             | C38  | P2              | 118.3(5)  |
| C1   | P2   | C32  | 104.3(3)  | C38             | C39  | C40             | 120.4(7)  |
| C1   | P2   | C38  | 106.5(3)  | C41             | C40  | C39             | 119.5(7)  |
| C32  | P2   | Pd1  | 123.4(2)  | C40             | C41  | C42             | 121.6(7)  |
| C32  | P2   | C38  | 107.3(3)  | C41             | C42  | C43             | 118.9(7)  |
| C38  | P2   | Pd1  | 119.5(2)  | C38             | C43  | C42             | 119.5(7)  |
| C14  | O1   | C17  | 117.4(6)  | F6 <sup>1</sup> | B2   | F6              | 112.4(11) |
| C21  | O2   | C24  | 117.0(6)  | F6 <sup>1</sup> | B2   | F5              | 108.2(3)  |
| C28  | O3   | C31  | 116.5(6)  | F6              | B2   | F5              | 111.3(5)  |
| C6   | N1   | Pd1  | 88.2(3)   | F6              | B2   | F5 <sup>1</sup> | 108.2(3)  |
| C6   | N1   | C44  | 113.3(6)  | F6 <sup>1</sup> | B2   | F5 <sup>1</sup> | 111.3(5)  |
| C6   | N1   | C45  | 112.5(5)  | F5 <sup>1</sup> | B2   | F5              | 105.4(12) |
| C44  | N1   | Pd1  | 111.6(4)  | F3              | B1   | F4              | 108.8(7)  |
| C44  | N1   | C45  | 110.8(5)  | F3              | B1   | F1              | 109.2(8)  |
| C45  | N1   | Pd1  | 118.7(4)  | F3              | B1   | F2              | 110.1(8)  |
| P2   | C1   | Fe1  | 117.2(3)  | F1              | B1   | F4              | 108.9(8)  |
| C2   | C1   | Fe1  | 69.5(4)   | F1              | B1   | F2              | 109.0(7)  |
| C2   | C1   | P2   | 128.1(5)  | F2              | B1   | F4              | 110.8(7)  |
| C2   | C1   | C5   | 108.2(6)  | F7              | B3   | F7 <sup>2</sup> | 125(2)    |
| C5   | C1   | Fe1  | 68.4(3)   | F8              | B3   | F7              | 103.4(8)  |
| C5   | C1   | P2   | 122.3(5)  | F8 <sup>2</sup> | B3   | F7              | 101.0(7)  |
| C1   | C2   | Fe1  | 70.8(4)   | F8              | B3   | F7 <sup>2</sup> | 101.0(7)  |
| C3   | C2   | Fe1  | 68.7(4)   | F8 <sup>2</sup> | B3   | F7 <sup>2</sup> | 103.4(8)  |
| C3   | C2   | C1   | 107.7(6)  | F8              | B3   | F8 <sup>2</sup> | 125.7(19) |

## Computational details

All the geometry optimizations and DFT computations were carried out with the Gaussian 16 suite of programs.<sup>11</sup> Harmonic vibrational analysis was obtained at the same level, and in the case of minima, all eigenvalues of the Hessian matrix were positive. For the determination of bond critical points and for Wiberg indices, Multiwfn program was used.<sup>12</sup>

**Table S19:** Experimental and DFT calculated Fe-Pd distances (in Å). For C, N, O, H, Cl, P 6-311+G\*\* and for Pd Def2TZVP basis sets were applied

|              | 10    | 11     | 12    | 13     | 14     | 15     |
|--------------|-------|--------|-------|--------|--------|--------|
| experimental | 2.837 | 2.7384 | 2.811 | 2.8289 | 2.8184 | 2.8349 |
| B3LYP        | 2.998 | 2.863  | 2.993 | 3.000  | 3.042  | 3.021  |
| B3LYP-D3     | 3.033 | 2.9    | 2.965 | 2.978  | 3.002  | 3.002  |
| ωB97X-D      | 2.945 | 2.832  | 2.87  | 2.883  | 2.895  | 2.896  |
| M06-2X       | 3.028 | 2.911  | 2.974 | 2.985  | 2.998  | 3.010  |

|          |       |       |       |       |       |       |
|----------|-------|-------|-------|-------|-------|-------|
| BP86     | 2.951 | 2.824 | 2.968 | 2.972 | 3.020 | 3.000 |
| PBEh1PBE | 2.932 | 2.818 | 2.915 | 2.921 | 2.965 | 2.940 |

**Table S20:** Electron density in the bond critical point and Wiberg index for Fe-Pd bond at  $\omega$ B97X-D/6-311+G\*\* (for Pd Def2TZVP)

| Fe-Pd bond                                            | <b>10</b> | <b>11</b> | <b>12</b> | <b>13</b> | <b>14</b> | <b>15</b> |
|-------------------------------------------------------|-----------|-----------|-----------|-----------|-----------|-----------|
| Electron density in the bond critical point<br>[a.u.] | 0.027     | 0.033     | 0.032     | 0.031     | 0.03      | 0.03      |
| Wiberg bond index                                     | 0.243     | 0.313     | 0.267     | 0.264     | 0.256     | 0.252     |

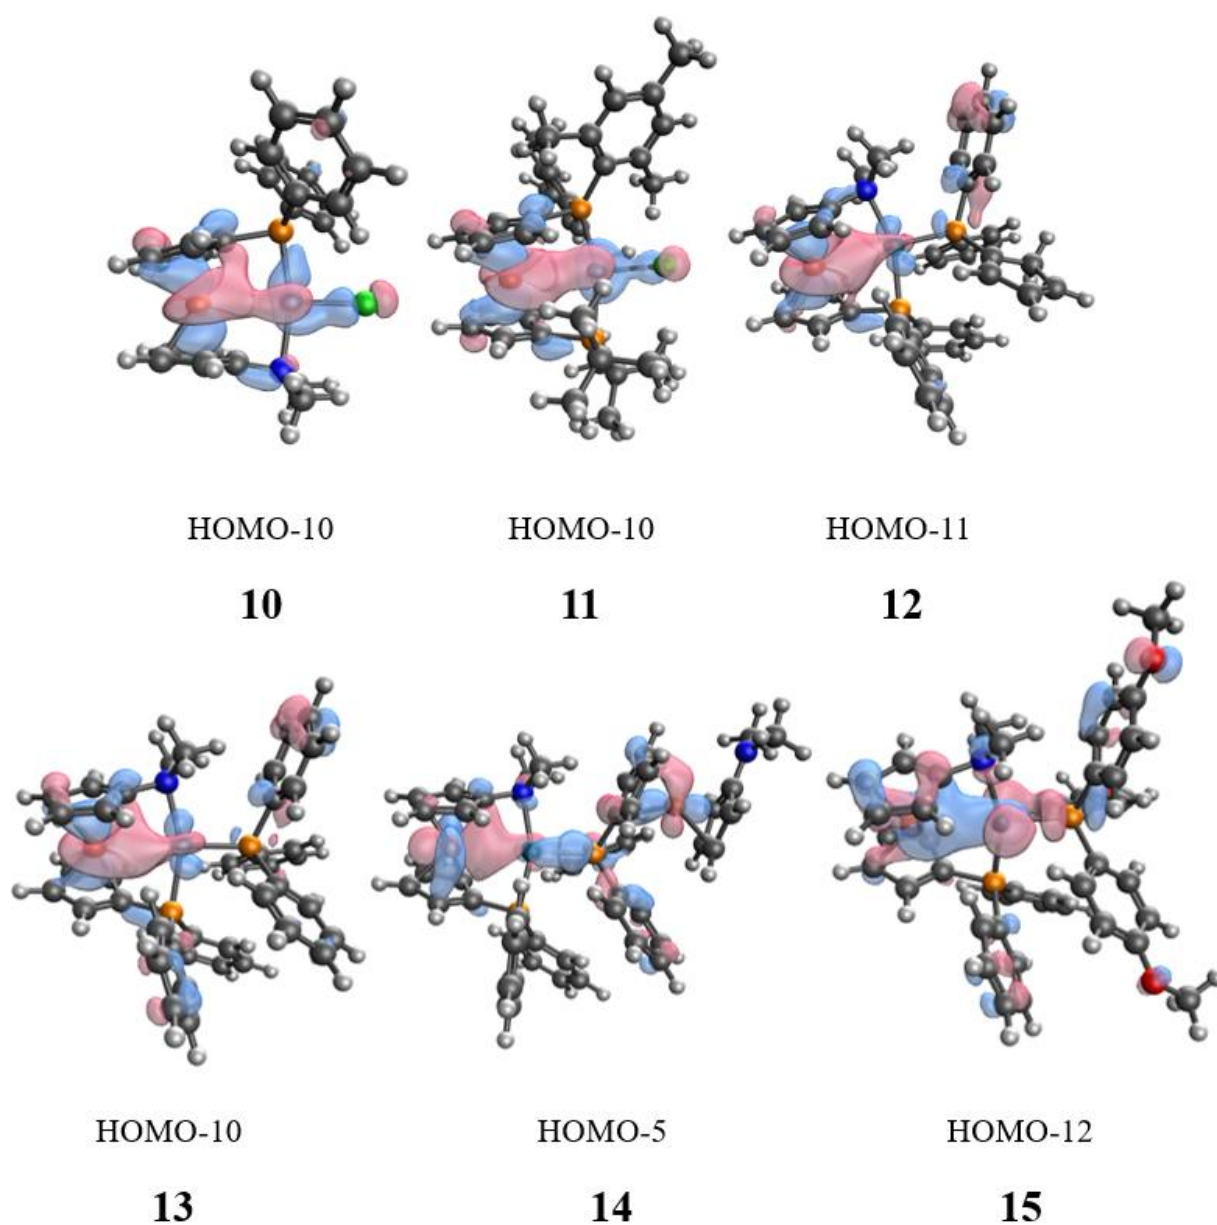

**Fig S63** Selected Kohn-Sham orbitals of the investigated systems. These orbitals can be responsible for the Fe->Pd interaction

**Table S21.** Tabulated data of the PES scans of compounds **10-15**

| <b>10</b>          |                       | <b>11</b>          |                       | <b>12</b>          |                       | <b>13</b>          |                       | <b>14</b>          |                       | <b>15</b>          |                       |
|--------------------|-----------------------|--------------------|-----------------------|--------------------|-----------------------|--------------------|-----------------------|--------------------|-----------------------|--------------------|-----------------------|
| Pd-Fe distance (Å) | relative E (kcal/mol) |
| 2.695              | 2.6                   | 2.582              | 4.5                   | 2.57               | 6.0                   | 2.583              | 5.8                   | 2.595              | 5.6                   | 2.596              | 5.6                   |
| 2.745              | 1.5                   | 2.632              | 2.7                   | 2.67               | 2.4                   | 2.683              | 2.3                   | 2.645              | 3.6                   | 2.696              | 2.2                   |
| 2.795              | 0.7                   | 2.682              | 1.4                   | 2.77               | 0.5                   | 2.783              | 0.5                   | 2.695              | 2.2                   | 2.796              | 0.4                   |
| 2.845              | 0.3                   | 2.732              | 0.6                   | <b>2.87</b>        | <b>0.0</b>            | <b>2.883</b>       | <b>0.0</b>            | 2.745              | 1.1                   | <b>2.896</b>       | <b>0.0</b>            |
| 2.895              | 0.1                   | 2.782              | 0.1                   | 2.97               | 0.6                   | 2.983              | 0.6                   | 2.795              | 0.4                   | 2.996              | 0.6                   |
| <b>2.945</b>       | <b>0.0</b>            | <b>2.832</b>       | <b>0.0</b>            | 3.07               | 2.2                   | 3.083              | 2.2                   | <b>2.845</b>       | <b>0.0</b>            | 3.096              | 2.1                   |
| 2.995              | 0.1                   | 2.882              | 0.2                   | 3.087              | 2.6                   | 3.183              | 4.5                   | <b>2.895</b>       | <b>0.0</b>            | 3.196              | 4.3                   |
| 3.045              | 0.5                   | 2.932              | 0.8                   | 3.187              | 5.1                   | 3.283              | 7.4                   | 2.995              | 0.7                   | 3.296              | 7.1                   |
| 3.095              | 1.1                   | 2.982              | 1.6                   | 3.287              | 8.1                   | 3.383              | 10.8                  | 3.095              | 2.3                   | 3.396              | 10.2                  |
| 3.145              | 1.8                   | 3.032              | 2.7                   | 3.387              | 11.6                  | 3.483              | 14.2                  | 3.195              | 4.7                   | 3.496              | 13.0                  |
| 3.195              | 2.7                   | 3.082              | 4.0                   | 3.487              | 14.9                  | 3.583              | 16.4                  | 3.295              | 7.8                   | 3.596              | 12.6                  |
| 3.245              | 3.9                   | 3.132              | 5.5                   | 3.587              | 16.1                  | 3.683              | 14.9                  | 3.395              | 11.2                  | 3.696              | 10.8                  |
| 3.345              | 6.6                   | 3.232              | 9.1                   | 3.687              | 14.8                  | 3.783              | 13.3                  | 3.495              | 14.5                  | 3.796              | 8.8                   |
| 3.445              | 10.0                  | 3.332              | 13.3                  | 3.787              | 13.2                  | 3.883              | 12.4                  | 3.595              | 15.7                  | 3.896              | 7.9                   |
| 3.545              | 13.9                  | 3.432              | 17.9                  | 3.887              | 12.3                  | 3.983              | 11.8                  | 3.695              | 11.4                  | 3.996              | 7.4                   |
| 3.645              | 12.5                  | 3.532              | 22.4                  | 3.987              | 11.9                  | 4.083              | 12.0                  | 3.795              | 10.2                  | 4.096              | 7.6                   |
| 3.745              | 14.2                  | 3.632              | 25.5                  | 4.087              | 12.2                  | 4.183              | 13.0                  | 3.895              | 9.4                   | 4.196              | 8.6                   |
| 3.845              | 16.2                  | 3.732              | 12.9                  | 4.187              | 13.2                  | 4.283              | 14.8                  | 3.995              | 9.3                   | 4.296              | 10.4                  |
| 3.945              | 18.6                  | 3.832              | 12.0                  | 4.287              | 15.1                  |                    |                       | 4.095              | 9.9                   | 4.396              | 13.0                  |
| 4.045              | 21.3                  | 3.932              | 11.5                  | 4.387              | 17.8                  |                    |                       | 4.195              | 11.2                  |                    |                       |
| 4.145              | 24.2                  | 4.032              | 11.9                  | 4.487              | 21.2                  |                    |                       | 4.295              | 13.2                  |                    |                       |
| 4.245              | 27.2                  | 4.132              | 13.2                  |                    |                       |                    |                       | 4.395              | 15.9                  |                    |                       |
|                    |                       | 4.232              | 15.4                  |                    |                       |                    |                       | 4.495              | 19.3                  |                    |                       |
|                    |                       | 4.332              | 18.4                  |                    |                       |                    |                       |                    |                       |                    |                       |
|                    |                       | 4.432              | 22.3                  |                    |                       |                    |                       |                    |                       |                    |                       |

**Table S22.** Results of the PES scan of **16** and the electron density in the bond critical points and Wiberg bond indices

| Fe-Pd distance [Å] | relative energy at $\omega$ B97X-D/6-311+G**// $\omega$ B97X-D/6-31G* (for Pd Def2TZVP) [kcal/mol] | relative energy at $\omega$ B97X-D/6-31G* (for Pd Def2TZVP) [kcal/mol] | electron density in the bond critical point [a.u.] | Wiberg bond index |
|--------------------|----------------------------------------------------------------------------------------------------|------------------------------------------------------------------------|----------------------------------------------------|-------------------|
| 2.377              | 11.5                                                                                               | 10.3                                                                   | 0.071                                              | 0.555             |
| 2.427              | 7.7                                                                                                | 7.5                                                                    | 0.065                                              | 0.519             |
| 2.477              | 4.8                                                                                                | 4.6                                                                    | 0.060                                              | 0.486             |
| 2.527              | 2.7                                                                                                | 2.5                                                                    | 0.055                                              | 0.454             |
| 2.577              | 1.2                                                                                                | 1.1                                                                    | 0.050                                              | 0.425             |
| 2.627              | 0.3                                                                                                | 0.3                                                                    | 0.046                                              | 0.397             |
| 2.677              | 0.0                                                                                                | 0.0                                                                    | 0.043                                              | 0.371             |
| 2.727              | 0.2                                                                                                | 0.2                                                                    | 0.040                                              | 0.348             |
| 2.777              | 0.8                                                                                                | 0.9                                                                    | 0.037                                              | 0.326             |
| 2.827              | 1.8                                                                                                | 2.0                                                                    | 0.034                                              | 0.305             |
| 2.877              | 3.1                                                                                                | 3.4                                                                    | 0.032                                              | 0.286             |
| 2.927              | 4.8                                                                                                | 5.2                                                                    | 0.029                                              | 0.268             |
| 2.977              | 6.8                                                                                                | 7.2                                                                    | 0.027                                              | 0.251             |

**Table S23.** Results of the PES scan of **17** and the electron density in the bond critical points and Wiberg bond indices

| Fe-Pd distance [Å] | relative energy at $\omega$ B97X-D/6-311+G**// $\omega$ B97X-D/6-31G* (for Pd Def2TZVP) [kcal/mol] | relative energy at $\omega$ B97X-D/6-31G* (for Pd Def2TZVP) [kcal/mol] | electron density in the bond critical point [a.u.] | Wiberg bond index |
|--------------------|----------------------------------------------------------------------------------------------------|------------------------------------------------------------------------|----------------------------------------------------|-------------------|
| 2.506              | 7.7                                                                                                | 7.5                                                                    | 0.056                                              | 0.475             |
| 2.556              | 5.2                                                                                                | 5.0                                                                    | 0.052                                              | 0.445             |
| 2.606              | 3.2                                                                                                | 3.0                                                                    | 0.047                                              | 0.417             |
| 2.656              | 1.7                                                                                                | 1.6                                                                    | 0.044                                              | 0.391             |
| 2.706              | 0.8                                                                                                | 0.7                                                                    | 0.04                                               | 0.367             |
| 2.756              | 0.2                                                                                                | 0.2                                                                    | 0.037                                              | 0.343             |
| 2.806              | 0.0                                                                                                | 0.0                                                                    | 0.035                                              | 0.321             |
| 2.856              | 0.1                                                                                                | 0.2                                                                    | no_bp                                              | 0.301             |
| 2.906              | 0.6                                                                                                | 0.6                                                                    | no_bp                                              | 0.281             |
| 2.956              | 1.3                                                                                                | 1.4                                                                    | no_bp                                              | 0.262             |
| 3.006              | 2.2                                                                                                | 2.4                                                                    | no_bp                                              | 0.245             |
| 3.056              | 3.4                                                                                                | 3.6                                                                    | no_bp                                              | 0.229             |
| 3.106              | 4.8                                                                                                | 5.1                                                                    | no_bp                                              | 0.214             |

**Table S24.** Results of the PES scan of **18** and the electron density in the bond critical points and Wiberg bond indices

| Fe-Pd distance [Å] | relative energy at $\omega$ B97X-D/6-311+G**// $\omega$ B97X-D/6-31G* (for Pd Def2TZVP) [kcal/mol] | relative energy at $\omega$ B97X-D/6-31G* (for Pd Def2TZVP) [kcal/mol] | electron density in the bond critical point (bp) [a.u.] | Wiberg bond index |
|--------------------|----------------------------------------------------------------------------------------------------|------------------------------------------------------------------------|---------------------------------------------------------|-------------------|
| 2.69               | 3.6                                                                                                | 3.8                                                                    | 0.041                                                   | 0.363             |
| 2.74               | 2.4                                                                                                | 2.5                                                                    | 0.038                                                   | 0.341             |

|      |     |     |       |       |
|------|-----|-----|-------|-------|
| 2.79 | 1.5 | 1.5 | 0.034 | 0.320 |
| 2.84 | 0.8 | 0.8 | 0.032 | 0.300 |
| 2.89 | 0.4 | 0.3 | 0.029 | 0.281 |
| 2.94 | 0.1 | 0.1 | 0.027 | 0.265 |
| 2.99 | 0.0 | 0.0 | 0.025 | 0.248 |
| 3.04 | 0.0 | 0.1 | 0.023 | 0.232 |
| 3.09 | 0.3 | 0.4 | 0.021 | 0.217 |
| 3.14 | 0.4 | 0.8 | 0.020 | 0.205 |
| 3.19 | 1.0 | 1.4 | no_bp | 0.191 |
| 3.24 | 1.7 | 2.2 | no_bp | 0.178 |
| 3.29 | 2.5 | 3.2 | no_bp | 0.165 |

## References

1. K. M. Gramigna, J. V. Oria, C. L. Mandell, M. A. Tiedemann, W. G. Dougherty, N. A. Piro, W. S. Kassel, B. C. Chan, P. L. Diaconescu and C. Nataro, Palladium(II) and Platinum(II) Compounds of 1,1'-Bis(phosphino)metallocene (M = Fe, Ru) Ligands with Metal–Metal Interactions, *Organometallics*, 2013, **32**, 5966-5979.
2. M. Sato, H. Shigeta, M. Sekino and S. Akabori, Synthesis, some reactions, and molecular structure of the Pd(BF<sub>4</sub>)<sub>2</sub> complex of 1,1'-bis(diphenylphosphino)ferrocene, *J. Organomet. Chem.*, 1993, **458**, 199-204.
3. K. D. Cabrera, A. T. Rowland, J. M. Szarko, P. L. Diaconescu, M. W. Bezpalko, W. S. Kassel and C. Nataro, Monodentate phosphine substitution in [Pd( $\kappa^3$ -dppf)(PR<sub>3</sub>)](BF<sub>4</sub>)<sub>2</sub> (dppf = 1,1'-bis(diphenylphosphino)ferrocene) compounds, *Dalton Trans.*, 2017, **46**, 5702-5710.
4. B. L. Blass, R. Hernández Sánchez, V. A. Decker, M. J. Robinson, N. A. Piro, W. S. Kassel, P. L. Diaconescu and C. Nataro, Structural, Computational, and Spectroscopic Investigation of [Pd( $\kappa^3$ -1,1'-bis(di-tert-butylphosphino)ferrocenediyl)X]<sup>+</sup> (X = Cl, Br, I) Compounds, *Organometallics*, 2016, **35**, 462-470.
5. G. Mann, Q. Shelby, A. H. Roy and J. F. Hartwig, Electronic and Steric Effects on the Reductive Elimination of Diaryl Ethers from Palladium(II), *Organometallics*, 2003, **22**, 2775-2789.
6. O. Bárta, R. Gyepes, I. Císařová, A. Alemayehu and P. Štěpnička, Synthesis and study of Fe → Pd interactions in unsymmetric Pd(ii) complexes with phosphinoferrocene guanidine ligands, *Dalton Trans.*, 2020, **49**, 4225-4229.
7. M. Navrátil, I. Císařová and P. Štěpnička, Synthesis and coordination of hybrid phosphinoferrocenes with extended donor pendants, *Dalton Trans.*, 2022, **51**, 14618-14629.
8. C. F. Macrae, P. R. Edgington, P. McCabe, E. Pidcock, G. P. Shields, R. Taylor, M. Towler and J. van de Streek, Mercury: visualization and analysis of crystal structures, *J. Appl. Crystallogr.*, 2006, **39**, 453-457.
9. C. F. Macrae, I. J. Bruno, J. A. Chisholm, P. R. Edgington, P. McCabe, E. Pidcock, L. Rodriguez-Monge, R. Taylor, J. van de Streek and P. A. Wood, Mercury CSD 2.0— new features for the visualization and investigation of crystal structures, *J. Appl. Crystallogr.*, 2008, **41**, 466-470.
10. M. A. Bennett, S. K. Bhargava, A. M. Bond, I. M. Burgar, S.-X. Guo, G. Kar, S. H. Privér, J. Wagler, A. C. Willis and A. A. J. Torriero, Synthesis, X-ray structure and electrochemical oxidation of palladium(ii) complexes of ferrocenyldiphenylphosphine, *Dalton Trans.*, 2010, **39**, 9079-9090.
11. M. J. Frisch, G. W. Trucks, H. B. Schlegel, G. E. Scuseria, M. A. Robb, J. R. Cheeseman, G. Scalmani, V. Barone, G. A. Petersson, H. Nakatsuji, X. Li, M. Caricato, A. V. Marenich, J. Bloino, B. G. Janesko, R. Gomperts, B. Mennucci, H. P. Hratchian, J. V. Ortiz, A. F. Izmaylov, J. L. Sonnenberg, Williams, F. Ding, F. Lipparini, F. Egidi, J. Goings, B. Peng, A. Petrone, T. Henderson, D. Ranasinghe, V. G. Zakrzewski, J. Gao, N. Rega, G. Zheng, W. Liang, M. Hada, M. Ehara, K. Toyota, R. Fukuda, J. Hasegawa, M. Ishida, T. Nakajima, Y. Honda, O. Kitao, H. Nakai, T. Vreven, K. Throssell, J. A. Montgomery Jr., J. E. Peralta, F. Ogliaro, M. J. Bearpark, J. J. Heyd, E. N. Brothers, K. N. Kudin, V. N. Staroverov, T. A. Keith, R. Kobayashi, J. Normand, K. Raghavachari, A. P. Rendell, J. C. Burant, S. S. Iyengar, J. Tomasi, M. Cossi, J. M. Millam, M. Klene, C. Adamo, R. Cammi, J. W. Ochterski, R. L. Martin, K. Morokuma, O. Farkas, J. B. Foresman and D. J. Fox, *Gaussian 16 Rev. C.01*, Wallingford, CT, 2016.
12. T. Lu and F. Chen, Multiwfn: A multifunctional wavefunction analyzer, *J. Comput. Chem.*, 2012, **33**, 580-592.
